# Supplementary material for: Combining single source chemical vapour deposition precursors to explore the phase space of titanium oxynitride thin films
Source: Royal Society of Chemistry journal article supplement (doi:10.1039/c7dt04694d), 2018-01-01
Supplement: c7dt04694d1.xlsx [file c7dt04694d1.xlsx]

## Sheet: XRD
			Data Below is GI-XRD, for thin films made with AACVD of TTIP and TDMAT. Labelled by fraction of TDMAT in the precursor
two theta	100% TDMAT	two theta	83% TDMAT	two theta	75% TDMAT	two theta	72% TDMAT	Two theta	69 % TDMAT	Two theta	67% TDMAT	Two theta	64% TDMAT	Two theta	60% TDMAT	Two theta	50% TDMAT
15.06	3798	15.06	3745	15.06	3423	10.02	3006	15.02	1535	15.02	1472	10.01	1207	10	459	5	3978
15.22	3906	15.22	3796	15.22	3647	10.1	2943	15.1	1509	15.1	1464	10.05	1201	10.04	514	5.04	3870
15.38	3857	15.38	3963	15.38	3635	10.18	2989	15.18	1491	15.18	1565	10.09	1245	10.08	497	5.08	3976
15.54	3985	15.54	3893	15.54	3630	10.26	2883	15.26	1523	15.26	1514	10.13	1123	10.12	455	5.12	3797
15.7	3935	15.7	3960	15.7	3592	10.34	2909	15.34	1589	15.34	1462	10.17	1183	10.16	460	5.16	3800
15.86	3973	15.86	3865	15.86	3627	10.42	2902	15.42	1551	15.42	1552	10.21	1235	10.2	480	5.2	3713
16.02	3897	16.02	3987	16.02	3701	10.5	2991	15.5	1543	15.5	1544	10.25	1204	10.24	490	5.24	3654
16.18	4091	16.18	3930	16.18	3683	10.58	2932	15.58	1638	15.58	1616	10.29	1180	10.28	499	5.28	3654
16.34	4007	16.34	3913	16.34	3651	10.66	2922	15.66	1541	15.66	1635	10.33	1171	10.32	515	5.32	3613
16.5	4121	16.5	4045	16.5	3618	10.74	2863	15.74	1677	15.74	1542	10.37	1221	10.36	501	5.36	3579
16.66	4079	16.66	4121	16.66	3790	10.82	2774	15.82	1660	15.82	1534	10.41	1135	10.4	513	5.4	3509
16.82	4206	16.82	4113	16.82	3775	10.9	2847	15.9	1650	15.9	1519	10.45	1206	10.44	498	5.44	3466
16.98	4176	16.98	4155	16.98	3805	10.98	2772	15.98	1682	15.98	1611	10.49	1202	10.48	504	5.48	3509
17.14	4345	17.14	4247	17.14	3769	11.06	2711	16.06	1707	16.06	1556	10.53	1168	10.52	499	5.52	3359
17.3	4226	17.3	4247	17.3	3815	11.14	2804	16.14	1648	16.14	1546	10.57	1117	10.56	502	5.56	3409
17.46	4246	17.46	4237	17.46	3799	11.22	2740	16.22	1601	16.22	1597	10.61	1200	10.6	478	5.6	3338
17.62	4274	17.62	4307	17.62	3894	11.3	2736	16.3	1639	16.3	1519	10.65	1143	10.64	466	5.64	3351
17.78	4454	17.78	4254	17.78	3939	11.38	2687	16.38	1718	16.38	1571	10.69	1152	10.68	512	5.68	3270
17.94	4396	17.94	4405	17.94	4099	11.46	2672	16.46	1733	16.46	1595	10.73	1165	10.72	450	5.72	3273
18.1	4469	18.1	4398	18.1	4009	11.54	2572	16.54	1757	16.54	1637	10.77	1147	10.76	475	5.76	3238
18.26	4546	18.26	4491	18.26	4196	11.62	2706	16.62	1662	16.62	1707	10.81	1145	10.8	493	5.8	3267
18.42	4533	18.42	4469	18.42	4137	11.7	2651	16.7	1752	16.7	1655	10.85	1140	10.84	459	5.84	3127
18.58	4629	18.58	4542	18.58	4151	11.78	2671	16.78	1738	16.78	1643	10.89	1115	10.88	447	5.88	3141
18.74	4709	18.74	4763	18.74	4075	11.86	2612	16.86	1770	16.86	1610	10.93	1163	10.92	450	5.92	3158
18.9	4685	18.9	4723	18.9	4353	11.94	2649	16.94	1699	16.94	1670	10.97	1156	10.96	505	5.96	3062
19.06	4837	19.06	4791	19.06	4339	12.02	2564	17.02	1756	17.02	1753	11.01	1150	11	436	6	3066
19.22	4857	19.22	4776	19.22	4425	12.1	2596	17.1	1848	17.1	1623	11.05	1170	11.04	448	6.04	3057
19.38	4983	19.38	4988	19.38	4360	12.18	2624	17.18	1805	17.18	1660	11.09	1119	11.08	481	6.08	3079
19.54	4963	19.54	5007	19.54	4581	12.26	2599	17.26	1744	17.26	1657	11.13	1130	11.12	466	6.12	3014
19.7	5061	19.7	5027	19.7	4386	12.34	2616	17.34	1772	17.34	1606	11.17	1110	11.16	478	6.16	2943
19.86	5041	19.86	4993	19.86	4604	12.42	2557	17.42	1785	17.42	1758	11.21	1140	11.2	483	6.2	3066
20.02	5240	20.02	5207	20.02	4558	12.5	2594	17.5	1857	17.5	1769	11.25	1140	11.24	443	6.24	2932
20.18	5342	20.18	5090	20.18	4535	12.58	2513	17.58	1834	17.58	1690	11.29	1147	11.28	490	6.28	2923
20.34	5262	20.34	5373	20.34	4581	12.66	2504	17.66	1835	17.66	1781	11.33	1120	11.32	454	6.32	2941
20.5	5243	20.5	5273	20.5	4697	12.74	2539	17.74	1926	17.74	1762	11.37	1080	11.36	481	6.36	2855
20.66	5456	20.66	5356	20.66	4813	12.82	2583	17.82	1938	17.82	1761	11.41	1096	11.4	483	6.4	2753
20.82	5387	20.82	5450	20.82	4817	12.9	2520	17.9	2084	17.9	1919	11.45	1167	11.44	448	6.44	2881
20.98	5342	20.98	5436	20.98	4859	12.98	2461	17.98	2489	17.98	1909	11.49	1102	11.48	487	6.48	2760
21.14	5596	21.14	5509	21.14	4916	13.06	2479	18.06	2994	18.06	2121	11.53	1056	11.52	471	6.52	2693
21.3	5486	21.3	5595	21.3	4876	13.14	2569	18.14	3201	18.14	2359	11.57	1139	11.56	468	6.56	2724
21.46	5729	21.46	5583	21.46	5064	13.22	2468	18.22	3352	18.22	2696	11.61	1090	11.6	445	6.6	2754
21.62	5703	21.62	5697	21.62	5016	13.3	2593	18.3	3339	18.3	3076	11.65	1087	11.64	470	6.64	2737
21.78	5721	21.78	5692	21.78	5027	13.38	2465	18.38	2788	18.38	3052	11.69	1114	11.68	461	6.68	2689
21.94	5773	21.94	5832	21.94	5161	13.46	2474	18.46	2348	18.46	2697	11.73	1100	11.72	463	6.72	2593
22.1	5938	22.1	5802	22.1	5181	13.54	2496	18.54	2132	18.54	2306	11.77	1092	11.76	447	6.76	2642
22.26	5765	22.26	5817	22.26	5190	13.62	2500	18.62	2119	18.62	2052	11.81	1108	11.8	450	6.8	2605
22.42	5913	22.42	5842	22.42	5205	13.7	2496	18.7	2170	18.7	1943	11.85	1126	11.84	439	6.84	2597
22.58	5889	22.58	5869	22.58	5275	13.78	2462	18.78	2099	18.78	1923	11.89	1122	11.88	432	6.88	2616
22.74	5812	22.74	5819	22.74	5335	13.86	2413	18.86	2039	18.86	1942	11.93	1085	11.92	461	6.92	2589
22.9	5883	22.9	5720	22.9	5315	13.94	2427	18.94	2100	18.94	1896	11.97	1145	11.96	462	6.96	2552
23.06	5898	23.06	5792	23.06	5272	14.02	2454	19.02	2149	19.02	2079	12.01	1154	12	454	7	2515
23.22	5969	23.22	5973	23.22	5384	14.1	2434	19.1	2176	19.1	2060	12.05	1113	12.04	430	7.04	2547
23.38	5908	23.38	5916	23.38	5384	14.18	2479	19.18	2120	19.18	2025	12.09	1093	12.08	425	7.08	2399
23.54	5818	23.54	5965	23.54	5379	14.26	2416	19.26	2227	19.26	2065	12.13	1099	12.12	462	7.12	2383
23.7	5900	23.7	5890	23.7	5241	14.34	2466	19.34	2151	19.34	2115	12.17	1127	12.16	401	7.16	2497
23.86	6088	23.86	5981	23.86	5350	14.42	2431	19.42	2249	19.42	2039	12.21	1126	12.2	448	7.2	2471
24.02	5952	24.02	5968	24.02	5339	14.5	2528	19.5	2269	19.5	1998	12.25	1120	12.24	464	7.24	2418
24.18	5961	24.18	5898	24.18	5373	14.58	2502	19.58	2200	19.58	2048	12.29	1074	12.28	451	7.28	2390
24.34	5851	24.34	6091	24.34	5365	14.66	2555	19.66	2245	19.66	2187	12.33	1012	12.32	415	7.32	2456
24.5	5809	24.5	6017	24.5	5327	14.74	2547	19.74	2205	19.74	2067	12.37	1116	12.36	456	7.36	2371
24.66	6033	24.66	6063	24.66	5426	14.82	2407	19.82	2219	19.82	2092	12.41	1157	12.4	406	7.4	2334
24.82	5801	24.82	5981	24.82	5367	14.9	2412	19.9	2345	19.9	2112	12.45	1099	12.44	459	7.44	2388
24.98	5595	24.98	5934	24.98	5373	14.98	2476	19.98	2339	19.98	2167	12.49	1069	12.48	438	7.48	2317
25.14	5791	25.14	5921	25.14	5376	15.06	2521	20.06	2293	20.06	2205	12.53	1080	12.52	491	7.52	2343
25.3	5843	25.3	5983	25.3	5430	15.14	2475	20.14	2311	20.14	2166	12.57	1083	12.56	441	7.56	2328
25.46	5746	25.46	5932	25.46	5249	15.22	2471	20.22	2408	20.22	2242	12.61	1130	12.6	458	7.6	2338
25.62	5588	25.62	6027	25.62	5328	15.3	2572	20.3	2408	20.3	2233	12.65	1133	12.64	449	7.64	2255
25.78	5702	25.78	5753	25.78	5290	15.38	2607	20.38	2403	20.38	2255	12.69	1085	12.68	453	7.68	2263
25.94	5621	25.94	5714	25.94	5343	15.46	2499	20.46	2355	20.46	2303	12.73	1059	12.72	441	7.72	2281
26.1	5618	26.1	5795	26.1	5241	15.54	2508	20.54	2398	20.54	2240	12.77	1077	12.76	449	7.76	2154
26.26	5465	26.26	5697	26.26	5151	15.62	2600	20.62	2544	20.62	2305	12.81	1104	12.8	413	7.8	2256
26.42	5516	26.42	5700	26.42	5130	15.7	2599	20.7	2470	20.7	2308	12.85	1126	12.84	449	7.84	2236
26.58	5422	26.58	5701	26.58	5296	15.78	2610	20.78	2466	20.78	2297	12.89	1134	12.88	425	7.88	2200
26.74	5428	26.74	5682	26.74	5084	15.86	2621	20.86	2459	20.86	2317	12.93	1159	12.92	428	7.92	2185
26.9	5522	26.9	5617	26.9	5160	15.94	2661	20.94	2541	20.94	2228	12.97	1121	12.96	445	7.96	2144
27.06	5455	27.06	5674	27.06	5090	16.02	2595	21.02	2508	21.02	2416	13.01	1116	13	463	8	2236
27.22	5417	27.22	5694	27.22	5034	16.1	2626	21.1	2587	21.1	2435	13.05	1104	13.04	414	8.04	2155
27.38	5448	27.38	5634	27.38	5045	16.18	2656	21.18	2523	21.18	2356	13.09	1057	13.08	485	8.08	2172
27.54	5293	27.54	5587	27.54	4964	16.26	2551	21.26	2483	21.26	2310	13.13	1133	13.12	501	8.12	2119
27.7	5236	27.7	5521	27.7	5185	16.34	2638	21.34	2608	21.34	2522	13.17	1105	13.16	444	8.16	2117
27.86	5172	27.86	5496	27.86	4992	16.42	2637	21.42	2612	21.42	2447	13.21	1108	13.2	466	8.2	2235
28.02	5183	28.02	5610	28.02	5110	16.5	2717	21.5	2547	21.5	2501	13.25	1082	13.24	445	8.24	2137
28.18	5081	28.18	5574	28.18	5036	16.58	2725	21.58	2666	21.58	2408	13.29	1089	13.28	457	8.28	2064
28.34	5220	28.34	5344	28.34	4995	16.66	2675	21.66	2637	21.66	2417	13.33	1116	13.32	488	8.32	2107
28.5	5062	28.5	5454	28.5	4884	16.74	2684	21.74	2615	21.74	2493	13.37	1077	13.36	452	8.36	2097
28.66	5166	28.66	5436	28.66	4936	16.82	2650	21.82	2615	21.82	2494	13.41	1158	13.4	424	8.4	2132
28.82	5054	28.82	5407	28.82	4847	16.9	2665	21.9	2698	21.9	2471	13.45	1085	13.44	429	8.44	2084
28.98	5070	28.98	5444	28.98	4889	16.98	2711	21.98	2744	21.98	2483	13.49	1135	13.48	408	8.48	2026
29.14	5045	29.14	5228	29.14	4937	17.06	2709	22.06	2743	22.06	2510	13.53	1097	13.52	446	8.52	2113
29.3	5112	29.3	5340	29.3	4774	17.14	2724	22.14	2685	22.14	2569	13.57	1147	13.56	470	8.56	2124
29.46	4886	29.46	5236	29.46	4859	17.22	2798	22.22	2770	22.22	2608	13.61	1070	13.6	423	8.6	2039
29.62	5088	29.62	5312	29.62	4843	17.3	2782	22.3	2740	22.3	2574	13.65	1088	13.64	453	8.64	1994
29.78	4756	29.78	5086	29.78	4653	17.38	2732	22.38	2724	22.38	2526	13.69	1062	13.68	426	8.68	2086
29.94	4775	29.94	5123	29.94	4734	17.46	2810	22.46	2858	22.46	2653	13.73	1111	13.72	432	8.72	1983
30.1	4743	30.1	5138	30.1	4682	17.54	2775	22.54	2792	22.54	2626	13.77	1089	13.76	466	8.76	1972
30.26	4824	30.26	5065	30.26	4576	17.62	2868	22.62	2785	22.62	2629	13.81	1152	13.8	455	8.8	2019
30.42	4767	30.42	4982	30.42	4493	17.7	2817	22.7	2793	22.7	2647	13.85	1116	13.84	452	8.84	1956
30.58	4764	30.58	4998	30.58	4668	17.78	2961	22.78	2844	22.78	2605	13.89	1144	13.88	434	8.88	1936
30.74	4673	30.74	4999	30.74	4483	17.86	3010	22.86	2892	22.86	2682	13.93	1101	13.92	385	8.92	1968
30.9	4650	30.9	4945	30.9	4534	17.94	3005	22.94	2852	22.94	2729	13.97	1126	13.96	419	8.96	1890
31.06	4668	31.06	4893	31.06	4363	18.02	3110	23.02	2911	23.02	2741	14.01	1019	14	437	9	1888
31.22	4650	31.22	4725	31.22	4499	18.1	3147	23.1	2822	23.1	2667	14.05	1162	14.04	401	9.04	1977
31.38	4675	31.38	4835	31.38	4280	18.18	3169	23.18	2864	23.18	2768	14.09	1140	14.08	401	9.08	1917
31.54	4559	31.54	4691	31.54	4357	18.26	3049	23.26	2896	23.26	2697	14.13	1151	14.12	436	9.12	1826
31.7	4539	31.7	4824	31.7	4272	18.34	3092	23.34	2775	23.34	2725	14.17	1110	14.16	477	9.16	1962
31.86	4527	31.86	4682	31.86	4217	18.42	3110	23.42	2958	23.42	2766	14.21	1178	14.2	448	9.2	1824
32.02	4462	32.02	4609	32.02	4073	18.5	2969	23.5	2897	23.5	2804	14.25	1158	14.24	417	9.24	1860
32.18	4324	32.18	4607	32.18	4051	18.58	3073	23.58	2885	23.58	2718	14.29	1127	14.28	479	9.28	1861
32.34	4367	32.34	4596	32.34	4183	18.66	3088	23.66	2930	23.66	2762	14.33	1130	14.32	453	9.32	1879
32.5	4417	32.5	4461	32.5	4130	18.74	3032	23.74	2968	23.74	2835	14.37	1150	14.36	462	9.36	1879
32.66	4476	32.66	4398	32.66	4057	18.82	3048	23.82	3097	23.82	2818	14.41	1128	14.4	422	9.4	1845
32.82	4317	32.82	4304	32.82	4041	18.9	3155	23.9	3057	23.9	2852	14.45	1116	14.44	478	9.44	1847
32.98	4262	32.98	4343	32.98	3981	18.98	3064	23.98	3003	23.98	2903	14.49	1171	14.48	455	9.48	1911
33.14	4134	33.14	4263	33.14	3843	19.06	3103	24.06	3069	24.06	2897	14.53	1149	14.52	449	9.52	1854
33.3	4141	33.3	4273	33.3	3860	19.14	3135	24.14	3101	24.14	2795	14.57	1149	14.56	441	9.56	1842
33.46	4102	33.46	4136	33.46	3990	19.22	3130	24.22	3034	24.22	2905	14.61	1172	14.6	488	9.6	1829
33.62	4158	33.62	4048	33.62	3915	19.3	3125	24.3	3039	24.3	2878	14.65	1160	14.64	438	9.64	1818
33.78	3993	33.78	4221	33.78	3753	19.38	3260	24.38	2976	24.38	2859	14.69	1161	14.68	482	9.68	1870
33.94	4076	33.94	4162	33.94	3665	19.46	3225	24.46	3063	24.46	3033	14.73	1206	14.72	442	9.72	1857
34.1	4093	34.1	4126	34.1	3713	19.54	3234	24.54	3033	24.54	3099	14.77	1153	14.76	456	9.76	1774
34.26	4044	34.26	3978	34.26	3627	19.62	3284	24.62	3118	24.62	2984	14.81	1149	14.8	463	9.8	1865
34.42	4034	34.42	3990	34.42	3557	19.7	3267	24.7	3123	24.7	2993	14.85	1178	14.84	468	9.84	1774
34.58	3998	34.58	4019	34.58	3615	19.78	3324	24.78	3238	24.78	2983	14.89	1207	14.88	486	9.88	1826
34.74	3969	34.74	3928	34.74	3498	19.86	3292	24.86	3447	24.86	3102	14.93	1205	14.92	467	9.92	1781
34.9	4019	34.9	3847	34.9	3467	19.94	3344	24.94	3655	24.94	3207	14.97	1209	14.96	451	9.96	1745
35.06	3990	35.06	3830	35.06	3421	20.02	3374	25.02	4115	25.02	3397	15.01	1227	15	501	10	1848
35.22	3895	35.22	3832	35.22	3482	20.1	3306	25.1	4519	25.1	4174	15.05	1211	15.04	475	10.04	1808
35.38	3958	35.38	3811	35.38	3415	20.18	3455	25.18	4960	25.18	5162	15.09	1159	15.08	502	10.08	1693
35.54	4033	35.54	3859	35.54	3502	20.26	3393	25.26	5308	25.26	6024	15.13	1209	15.12	462	10.12	1816
35.7	3909	35.7	3774	35.7	3441	20.34	3557	25.34	5119	25.34	6670	15.17	1163	15.16	429	10.16	1777
35.86	4040	35.86	3764	35.86	3413	20.42	3366	25.42	4813	25.42	6943	15.21	1187	15.2	426	10.2	1664
36.02	3897	36.02	3903	36.02	3537	20.5	3530	25.5	4554	25.5	6403	15.25	1290	15.24	474	10.24	1792
36.18	3954	36.18	3766	36.18	3424	20.58	3408	25.58	4091	25.58	5400	15.29	1222	15.28	457	10.28	1707
36.34	4074	36.34	3879	36.34	3524	20.66	3493	25.66	3935	25.66	4206	15.33	1296	15.32	517	10.32	1749
36.5	4107	36.5	3958	36.5	3378	20.74	3430	25.74	3654	25.74	3493	15.37	1212	15.36	450	10.36	1673
36.66	4083	36.66	3917	36.66	3448	20.82	3646	25.82	3663	25.82	3257	15.41	1197	15.4	484	10.4	1696
36.82	4192	36.82	3838	36.82	3522	20.9	3560	25.9	3548	25.9	3078	15.45	1130	15.44	483	10.44	1682
36.98	4132	36.98	3869	36.98	3716	20.98	3550	25.98	3466	25.98	2975	15.49	1278	15.48	453	10.48	1649
37.14	4015	37.14	3763	37.14	3629	21.06	3518	26.06	3386	26.06	3079	15.53	1280	15.52	474	10.52	1651
37.3	3964	37.3	3674	37.3	3838	21.14	3710	26.14	3182	26.14	2875	15.57	1294	15.56	483	10.56	1667
37.46	3926	37.46	3507	37.46	3790	21.22	3638	26.22	3228	26.22	2969	15.61	1289	15.6	449	10.6	1646
37.62	3854	37.62	3337	37.62	3766	21.3	3693	26.3	3240	26.3	2981	15.65	1260	15.64	535	10.64	1603
37.78	3816	37.78	3239	37.78	3749	21.38	3626	26.38	3239	26.38	2917	15.69	1290	15.68	521	10.68	1618
37.94	3612	37.94	3188	37.94	3454	21.46	3596	26.46	3143	26.46	2977	15.73	1292	15.72	511	10.72	1708
38.1	3586	38.1	3069	38.1	3178	21.54	3677	26.54	3288	26.54	2888	15.77	1274	15.76	494	10.76	1727
38.26	3589	38.26	3030	38.26	3117	21.62	3698	26.62	3164	26.62	2957	15.81	1259	15.8	510	10.8	1697
38.42	3402	38.42	3060	38.42	2938	21.7	3696	26.7	3354	26.7	2985	15.85	1248	15.84	483	10.84	1619
38.58	3382	38.58	2907	38.58	2772	21.78	3721	26.78	3271	26.78	2968	15.89	1219	15.88	491	10.88	1657
38.74	3358	38.74	3076	38.74	2726	21.86	3751	26.86	3171	26.86	3039	15.93	1214	15.92	535	10.92	1629
38.9	3309	38.9	2859	38.9	2670	21.94	3740	26.94	3448	26.94	2962	15.97	1394	15.96	504	10.96	1702
39.06	3230	39.06	2887	39.06	2616	22.02	3704	27.02	3392	27.02	3045	16.01	1250	16	497	11	1645
39.22	3167	39.22	2834	39.22	2539	22.1	3697	27.1	3474	27.1	2937	16.05	1241	16.04	493	11.04	1684
39.38	3192	39.38	2927	39.38	2522	22.18	3831	27.18	3388	27.18	2994	16.09	1258	16.08	508	11.08	1627
39.54	3214	39.54	2756	39.54	2518	22.26	3824	27.26	3504	27.26	2892	16.13	1257	16.12	500	11.12	1608
39.7	3151	39.7	2814	39.7	2577	22.34	3799	27.34	3622	27.34	2843	16.17	1260	16.16	483	11.16	1672
39.86	3213	39.86	2883	39.86	2504	22.42	3780	27.42	3592	27.42	2866	16.21	1218	16.2	526	11.2	1655
40.02	3215	40.02	2933	40.02	2509	22.5	3850	27.5	3544	27.5	2873	16.25	1343	16.24	516	11.24	1612
40.18	3265	40.18	3006	40.18	2611	22.58	3793	27.58	3515	27.58	2855	16.29	1346	16.28	525	11.28	1638
40.34	3367	40.34	2925	40.34	2563	22.66	3803	27.66	3576	27.66	2818	16.33	1328	16.32	512	11.32	1626
40.5	3323	40.5	3076	40.5	2512	22.74	3770	27.74	3581	27.74	2888	16.37	1356	16.36	559	11.36	1597
40.66	3353	40.66	2991	40.66	2608	22.82	3978	27.82	3520	27.82	2880	16.41	1330	16.4	530	11.4	1607
40.82	3468	40.82	3091	40.82	2647	22.9	3963	27.9	3410	27.9	2823	16.45	1341	16.44	519	11.44	1564
40.98	3610	40.98	3309	40.98	2661	22.98	3875	27.98	3372	27.98	2842	16.49	1333	16.48	538	11.48	1588
41.14	3513	41.14	3292	41.14	2662	23.06	3995	28.06	3241	28.06	2818	16.53	1292	16.52	498	11.52	1627
41.3	3646	41.3	3347	41.3	2847	23.14	3896	28.14	3389	28.14	2717	16.57	1415	16.56	522	11.56	1578
41.46	3734	41.46	3511	41.46	2876	23.22	3958	28.22	3122	28.22	2741	16.61	1375	16.6	536	11.6	1593
41.62	3848	41.62	3838	41.62	2867	23.3	4027	28.3	3103	28.3	2718	16.65	1386	16.64	530	11.64	1533
41.78	3797	41.78	4012	41.78	2977	23.38	4087	28.38	3125	28.38	2727	16.69	1381	16.68	528	11.68	1589
41.94	3987	41.94	4295	41.94	3042	23.46	4043	28.46	3003	28.46	2781	16.73	1319	16.72	530	11.72	1556
42.1	4131	42.1	4610	42.1	3280	23.54	3990	28.54	2907	28.54	2773	16.77	1424	16.76	550	11.76	1563
42.26	4117	42.26	5055	42.26	3411	23.62	3931	28.62	2922	28.62	2638	16.81	1393	16.8	536	11.8	1560
42.42	4272	42.42	5382	42.42	3702	23.7	4048	28.7	2937	28.7	2693	16.85	1382	16.84	542	11.84	1619
42.58	4144	42.58	5827	42.58	3867	23.78	3916	28.78	2832	28.78	2730	16.89	1370	16.88	536	11.88	1588
42.74	4423	42.74	6034	42.74	4237	23.86	4079	28.86	2870	28.86	2679	16.93	1422	16.92	543	11.92	1564
42.9	4434	42.9	6299	42.9	4524	23.94	3930	28.94	2808	28.94	2632	16.97	1430	16.96	568	11.96	1620
43.06	4477	43.06	6426	43.06	4839	24.02	4006	29.02	2861	29.02	2612	17.01	1444	17	577	12	1562
43.22	4484	43.22	6336	43.22	5538	24.1	4080	29.1	2864	29.1	2603	17.05	1473	17.04	548	12.04	1541
43.38	4456	43.38	6302	43.38	6057	24.18	4033	29.18	2882	29.18	2567	17.09	1438	17.08	555	12.08	1547
43.54	4417	43.54	6202	43.54	6748	24.26	4080	29.26	2826	29.26	2660	17.13	1480	17.12	547	12.12	1571
43.7	4387	43.7	5684	43.7	7192	24.34	4167	29.34	2752	29.34	2585	17.17	1465	17.16	558	12.16	1580
43.86	4455	43.86	5410	43.86	7435	24.42	4117	29.42	2811	29.42	2581	17.21	1499	17.2	559	12.2	1547
44.02	4214	44.02	5132	44.02	7418	24.5	4062	29.5	2736	29.5	2544	17.25	1493	17.24	614	12.24	1575
44.18	4153	44.18	4954	44.18	7143	24.58	4004	29.58	2685	29.58	2593	17.29	1376	17.28	571	12.28	1581
44.34	3991	44.34	4468	44.34	6303	24.66	4064	29.66	2680	29.66	2539	17.33	1442	17.32	612	12.32	1608
44.5	3859	44.5	4098	44.5	5518	24.74	4262	29.74	2651	29.74	2548	17.37	1511	17.36	561	12.36	1547
44.66	3606	44.66	3797	44.66	4838	24.82	4175	29.82	2712	29.82	2449	17.41	1511	17.4	587	12.4	1557
44.82	3551	44.82	3608	44.82	4142	24.9	4094	29.9	2686	29.9	2465	17.45	1461	17.44	555	12.44	1648
44.98	3401	44.98	3505	44.98	3779	24.98	4294	29.98	2584	29.98	2484	17.49	1491	17.48	560	12.48	1601
45.14	3334	45.14	3270	45.14	3412	25.06	4221	30.06	2637	30.06	2377	17.53	1544	17.52	573	12.52	1551
45.3	3296	45.3	3168	45.3	3049	25.14	4301	30.14	2599	30.14	2488	17.57	1562	17.56	566	12.56	1583
45.46	2962	45.46	2907	45.46	3022	25.22	4300	30.22	2697	30.22	2471	17.61	1553	17.6	575	12.6	1586
45.62	2918	45.62	3061	45.62	2844	25.3	4215	30.3	2607	30.3	2331	17.65	1599	17.64	585	12.64	1576
45.78	2885	45.78	2859	45.78	2807	25.38	4342	30.38	2609	30.38	2431	17.69	1548	17.68	564	12.68	1566
45.94	2769	45.94	2828	45.94	2616	25.46	4280	30.46	2584	30.46	2362	17.73	1581	17.72	590	12.72	1601
46.1	2721	46.1	2725	46.1	2625	25.54	4203	30.54	2569	30.54	2374	17.77	1559	17.76	637	12.76	1497
46.26	2733	46.26	2804	46.26	2373	25.62	4213	30.62	2528	30.62	2331	17.81	1501	17.8	557	12.8	1610
46.42	2641	46.42	2581	46.42	2377	25.7	4189	30.7	2575	30.7	2261	17.85	1544	17.84	612	12.84	1547
46.58	2565	46.58	2593	46.58	2401	25.78	4291	30.78	2533	30.78	2262	17.89	1568	17.88	585	12.88	1541
46.74	2547	46.74	2469	46.74	2322	25.86	4334	30.86	2532	30.86	2299	17.93	1517	17.92	651	12.92	1601
46.9	2495	46.9	2498	46.9	2311	25.94	4282	30.94	2431	30.94	2273	17.97	1566	17.96	643	12.96	1560
47.06	2499	47.06	2419	47.06	2235	26.02	4143	31.02	2526	31.02	2205	18.01	1650	18	605	13	1604
47.22	2379	47.22	2483	47.22	2310	26.1	4167	31.1	2544	31.1	2310	18.05	1524	18.04	613	13.04	1527
47.38	2435	47.38	2401	47.38	2123	26.18	4234	31.18	2469	31.18	2271	18.09	1625	18.08	617	13.08	1495
47.54	2293	47.54	2248	47.54	2162	26.26	4294	31.26	2494	31.26	2212	18.13	1626	18.12	601	13.12	1524
47.7	2354	47.7	2227	47.7	2132	26.34	4171	31.34	2485	31.34	2226	18.17	1642	18.16	642	13.16	1561
47.86	2233	47.86	2353	47.86	2077	26.42	4274	31.42	2406	31.42	2254	18.21	1635	18.2	621	13.2	1567
48.02	2268	48.02	2292	48.02	2049	26.5	4272	31.5	2428	31.5	2198	18.25	1632	18.24	632	13.24	1567
48.18	2226	48.18	2270	48.18	2122	26.58	4301	31.58	2417	31.58	2011	18.29	1634	18.28	660	13.28	1487
48.34	2148	48.34	2241	48.34	2043	26.66	4317	31.66	2403	31.66	2108	18.33	1739	18.32	665	13.32	1562
48.5	2200	48.5	2203	48.5	2082	26.74	4296	31.74	2353	31.74	2142	18.37	1624	18.36	611	13.36	1588
48.66	2197	48.66	2212	48.66	2028	26.82	4330	31.82	2362	31.82	2121	18.41	1627	18.4	628	13.4	1509
48.82	2274	48.82	2214	48.82	1970	26.9	4242	31.9	2387	31.9	2161	18.45	1681	18.44	675	13.44	1546
48.98	2134	48.98	2089	48.98	1973	26.98	4521	31.98	2361	31.98	2100	18.49	1672	18.48	640	13.48	1598
49.14	2061	49.14	2207	49.14	1984	27.06	4228	32.06	2336	32.06	2203	18.53	1621	18.52	685	13.52	1588
49.3	2121	49.3	2092	49.3	2000	27.14	4480	32.14	2339	32.14	2064	18.57	1617	18.56	644	13.56	1615
49.46	2113	49.46	2144	49.46	1911	27.22	4410	32.22	2245	32.22	1919	18.61	1674	18.6	632	13.6	1527
49.62	2084	49.62	2243	49.62	1984	27.3	4544	32.3	2274	32.3	2042	18.65	1631	18.64	716	13.64	1570
49.78	2073	49.78	2063	49.78	1976	27.38	4407	32.38	2293	32.38	2022	18.69	1748	18.68	699	13.68	1579
49.94	2039	49.94	2092	49.94	1900	27.46	4559	32.46	2318	32.46	2075	18.73	1743	18.72	658	13.72	1656
50.1	2111	50.1	2139	50.1	1932	27.54	4529	32.54	2294	32.54	1992	18.77	1665	18.76	688	13.76	1566
50.26	2100	50.26	2205	50.26	1921	27.62	4420	32.62	2258	32.62	2040	18.81	1823	18.8	676	13.8	1589
50.42	2042	50.42	2069	50.42	1967	27.7	4486	32.7	2321	32.7	2032	18.85	1723	18.84	708	13.84	1477
50.58	1993	50.58	2076	50.58	1874	27.78	4441	32.78	2222	32.78	1951	18.89	1812	18.88	673	13.88	1576
50.74	2059	50.74	2092	50.74	1922	27.86	4446	32.86	2261	32.86	1978	18.93	1728	18.92	681	13.92	1543
50.9	2038	50.9	2098	50.9	1911	27.94	4481	32.94	2320	32.94	2020	18.97	1828	18.96	696	13.96	1597
51.06	1981	51.06	2047	51.06	1853	28.02	4490	33.02	2302	33.02	1882	19.01	1745	19	629	14	1605
51.22	1962	51.22	2106	51.22	1898	28.1	4838	33.1	2202	33.1	1990	19.05	1848	19.04	674	14.04	1602
51.38	2013	51.38	2018	51.38	1810	28.18	4787	33.18	2124	33.18	1942	19.09	1783	19.08	713	14.08	1594
51.54	1961	51.54	2125	51.54	1881	28.26	4420	33.26	2077	33.26	1869	19.13	1758	19.12	717	14.12	1548
51.7	1999	51.7	2104	51.7	1874	28.34	4265	33.34	2073	33.34	1884	19.17	1811	19.16	716	14.16	1637
51.86	2036	51.86	2049	51.86	1921	28.42	4210	33.42	2179	33.42	1916	19.21	1858	19.2	743	14.2	1595
52.02	1991	52.02	2070	52.02	1925	28.5	4196	33.5	2091	33.5	1826	19.25	1886	19.24	693	14.24	1613
52.18	2007	52.18	2034	52.18	1917	28.58	4046	33.58	2096	33.58	1888	19.29	1839	19.28	693	14.28	1608
52.34	1979	52.34	2108	52.34	1915	28.66	4021	33.66	2040	33.66	1758	19.33	1892	19.32	699	14.32	1600
52.5	1990	52.5	2047	52.5	1922	28.74	4121	33.74	1915	33.74	1802	19.37	1890	19.36	786	14.36	1593
52.66	2000	52.66	2063	52.66	1811	28.82	3948	33.82	2036	33.82	1810	19.41	1924	19.4	738	14.4	1648
52.82	1932	52.82	2041	52.82	1827	28.9	3971	33.9	2065	33.9	1804	19.45	1881	19.44	720	14.44	1610
52.98	2048	52.98	2075	52.98	1912	28.98	3926	33.98	2075	33.98	1733	19.49	1891	19.48	734	14.48	1609
53.14	1964	53.14	2071	53.14	1859	29.06	3946	34.06	1980	34.06	1842	19.53	1925	19.52	731	14.52	1589
53.3	1993	53.3	1980	53.3	1789	29.14	3912	34.14	1888	34.14	1721	19.57	1844	19.56	727	14.56	1669
53.46	1993	53.46	2067	53.46	1855	29.22	3827	34.22	1986	34.22	1789	19.61	1943	19.6	733	14.6	1640
53.62	1968	53.62	1979	53.62	1870	29.3	3859	34.3	1976	34.3	1740	19.65	1915	19.64	762	14.64	1602
53.78	1960	53.78	2057	53.78	1876	29.38	3865	34.38	1993	34.38	1786	19.69	1925	19.68	748	14.68	1669
53.94	2044	53.94	2178	53.94	1888	29.46	3915	34.46	1969	34.46	1705	19.73	1948	19.72	702	14.72	1569
54.1	1959	54.1	2081	54.1	1884	29.54	3681	34.54	1851	34.54	1734	19.77	1994	19.76	746	14.76	1579
54.26	1984	54.26	1975	54.26	1854	29.62	3774	34.62	1961	34.62	1770	19.81	1959	19.8	744	14.8	1636
54.42	1936	54.42	2058	54.42	1882	29.7	3778	34.7	1897	34.7	1635	19.85	1955	19.84	742	14.84	1671
54.58	1926	54.58	2088	54.58	1822	29.78	3880	34.78	1926	34.78	1724	19.89	1946	19.88	717	14.88	1659
54.74	1909	54.74	2087	54.74	1910	29.86	3667	34.86	1880	34.86	1781	19.93	1950	19.92	797	14.92	1705
54.9	2012	54.9	1973	54.9	1893	29.94	3741	34.94	1888	34.94	1730	19.97	1972	19.96	784	14.96	1625
55.06	1969	55.06	2100	55.06	1901	30.02	3798	35.02	1995	35.02	1704	20.01	1961	20	729	15	1612
55.22	1958	55.22	2113	55.22	1843	30.1	3680	35.1	1884	35.1	1733	20.05	1988	20.04	788	15.04	1613
55.38	1997	55.38	1988	55.38	1873	30.18	3826	35.18	1812	35.18	1723	20.09	1951	20.08	816	15.08	1608
55.54	2021	55.54	2045	55.54	1955	30.26	3765	35.26	1935	35.26	1740	20.13	2001	20.12	813	15.12	1693
55.7	1963	55.7	2027	55.7	1870	30.34	3614	35.34	1869	35.34	1788	20.17	1964	20.16	762	15.16	1735
55.86	2006	55.86	2079	55.86	1895	30.42	3608	35.42	1824	35.42	1817	20.21	2101	20.2	798	15.2	1688
56.02	1984	56.02	2056	56.02	1905	30.5	3584	35.5	1843	35.5	1761	20.25	2086	20.24	785	15.24	1654
56.18	2052	56.18	2029	56.18	1916	30.58	3629	35.58	1842	35.58	1787	20.29	2063	20.28	793	15.28	1692
56.34	1914	56.34	2135	56.34	1926	30.66	3564	35.66	1868	35.66	1941	20.33	2141	20.32	818	15.32	1622
56.5	2058	56.5	2097	56.5	1840	30.74	3593	35.74	1909	35.74	1920	20.37	2050	20.36	776	15.36	1687
56.66	2045	56.66	2002	56.66	1992	30.82	3602	35.82	1937	35.82	2038	20.41	2076	20.4	830	15.4	1664
56.82	2066	56.82	2050	56.82	1884	30.9	3551	35.9	1955	35.9	2041	20.45	2037	20.44	806	15.44	1659
56.98	2069	56.98	1993	56.98	1941	30.98	3562	35.98	1963	35.98	2208	20.49	2062	20.48	806	15.48	1627
57.14	2066	57.14	2136	57.14	1917	31.06	3528	36.06	1959	36.06	2257	20.53	2036	20.52	805	15.52	1743
57.3	1999	57.3	2056	57.3	1872	31.14	3611	36.14	1976	36.14	2351	20.57	2174	20.56	849	15.56	1715
57.46	2119	57.46	2103	57.46	1945	31.22	3545	36.22	2157	36.22	2317	20.61	2137	20.6	782	15.6	1740
57.62	2066	57.62	2102	57.62	1902	31.3	3508	36.3	2131	36.3	2428	20.65	2102	20.64	806	15.64	1715
57.78	2113	57.78	2104	57.78	1916	31.38	3496	36.38	2126	36.38	2466	20.69	2180	20.68	820	15.68	1722
57.94	2131	57.94	2106	57.94	1900	31.46	3372	36.46	2087	36.46	2587	20.73	2164	20.72	817	15.72	1775
58.1	2110	58.1	2086	58.1	1959	31.54	3449	36.54	2090	36.54	2445	20.77	2169	20.76	856	15.76	1757
58.26	2120	58.26	2167	58.26	1905	31.62	3503	36.62	2106	36.62	2526	20.81	2217	20.8	855	15.8	1761
58.42	2174	58.42	2076	58.42	1890	31.7	3466	36.7	2071	36.7	2352	20.85	2168	20.84	862	15.84	1746
58.58	2116	58.58	2089	58.58	1899	31.78	3340	36.78	1947	36.78	2287	20.89	2223	20.88	861	15.88	1811
58.74	2258	58.74	2167	58.74	1844	31.86	3303	36.86	1953	36.86	2245	20.93	2116	20.92	834	15.92	1817
58.9	2232	58.9	2161	58.9	1843	31.94	3295	36.94	1943	36.94	2142	20.97	2195	20.96	801	15.96	1772
59.06	2216	59.06	2077	59.06	1882	32.02	3326	37.02	1806	37.02	2102	21.01	2208	21	802	16	1766
59.22	2160	59.22	2141	59.22	1887	32.1	3325	37.1	1801	37.1	2064	21.05	2221	21.04	858	16.04	1798
59.38	2147	59.38	2180	59.38	1923	32.18	3293	37.18	1847	37.18	1955	21.09	2193	21.08	837	16.08	1816
59.54	2319	59.54	2228	59.54	1974	32.26	3345	37.26	1752	37.26	2010	21.13	2270	21.12	884	16.12	1809
59.7	2347	59.7	2128	59.7	1937	32.34	3211	37.34	1736	37.34	1849	21.17	2276	21.16	899	16.16	1830
59.86	2239	59.86	2199	59.86	1953	32.42	3162	37.42	1784	37.42	1837	21.21	2289	21.2	861	16.2	1767
60.02	2291	60.02	2366	60.02	2032	32.5	3262	37.5	1710	37.5	1908	21.25	2245	21.24	822	16.24	1812
60.18	2411	60.18	2249	60.18	1964	32.58	3277	37.58	1713	37.58	1729	21.29	2312	21.28	814	16.28	1862
60.34	2363	60.34	2380	60.34	2047	32.66	3168	37.66	1646	37.66	1759	21.33	2269	21.32	875	16.32	1822
60.5	2577	60.5	2390	60.5	2152	32.74	3112	37.74	1670	37.74	1629	21.37	2264	21.36	929	16.36	1821
60.66	2459	60.66	2483	60.66	2112	32.82	3150	37.82	1635	37.82	1673	21.41	2165	21.4	867	16.4	1849
60.82	2531	60.82	2581	60.82	2153	32.9	3102	37.9	1627	37.9	1568	21.45	2294	21.44	891	16.44	1866
60.98	2543	60.98	2582	60.98	2136	32.98	3165	37.98	1504	37.98	1524	21.49	2318	21.48	910	16.48	1816
61.14	2500	61.14	2678	61.14	2271	33.06	3153	38.06	1460	38.06	1487	21.53	2297	21.52	926	16.52	1929
61.3	2664	61.3	2797	61.3	2249	33.14	3130	38.14	1529	38.14	1480	21.57	2281	21.56	887	16.56	1876
61.46	2589	61.46	2830	61.46	2346	33.22	3138	38.22	1487	38.22	1434	21.61	2338	21.6	933	16.6	1883
61.62	2677	61.62	2935	61.62	2343	33.3	3029	38.3	1463	38.3	1339	21.65	2309	21.64	918	16.64	1889
61.78	2687	61.78	2989	61.78	2413	33.38	3133	38.38	1427	38.38	1374	21.69	2344	21.68	861	16.68	1939
61.94	2754	61.94	3145	61.94	2565	33.46	3060	38.46	1503	38.46	1370	21.73	2327	21.72	885	16.72	1827
62.1	2754	62.1	3338	62.1	2685	33.54	3096	38.54	1444	38.54	1298	21.77	2291	21.76	901	16.76	1913
62.26	2776	62.26	3225	62.26	2836	33.62	3076	38.62	1416	38.62	1327	21.81	2258	21.8	873	16.8	1908
62.42	2907	62.42	3173	62.42	2792	33.7	2969	38.7	1470	38.7	1348	21.85	2286	21.84	890	16.84	1989
62.58	2829	62.58	3332	62.58	3036	33.78	3041	38.78	1397	38.78	1306	21.89	2377	21.88	937	16.88	1952
62.74	2794	62.74	3365	62.74	3169	33.86	2983	38.86	1482	38.86	1294	21.93	2428	21.92	892	16.92	1980
62.9	2783	62.9	3250	62.9	3343	33.94	2968	38.94	1448	38.94	1309	21.97	2359	21.96	898	16.96	1924
63.06	2757	63.06	3272	63.06	3484	34.02	2941	39.02	1524	39.02	1303	22.01	2367	22	928	17	2009
63.22	2680	63.22	3159	63.22	3545	34.1	3046	39.1	1425	39.1	1273	22.05	2312	22.04	913	17.04	1897
63.38	2626	63.38	3167	63.38	3599	34.18	2987	39.18	1462	39.18	1326	22.09	2366	22.08	861	17.08	1927
63.54	2741	63.54	2935	63.54	3719	34.26	2896	39.26	1424	39.26	1212	22.13	2260	22.12	920	17.12	1969
63.7	2596	63.7	2997	63.7	3587	34.34	2877	39.34	1377	39.34	1270	22.17	2304	22.16	875	17.16	1952
63.86	2682	63.86	2839	63.86	3413	34.42	2939	39.42	1395	39.42	1269	22.21	2431	22.2	949	17.2	1978
64.02	2517	64.02	2738	64.02	3325	34.5	2836	39.5	1384	39.5	1210	22.25	2335	22.24	965	17.24	1997
64.18	2465	64.18	2528	64.18	3015	34.58	2793	39.58	1315	39.58	1242	22.29	2426	22.28	937	17.28	1969
64.34	2455	64.34	2524	64.34	2871	34.66	2884	39.66	1364	39.66	1160	22.33	2332	22.32	905	17.32	2038
64.5	2365	64.5	2421	64.5	2728	34.74	2791	39.74	1265	39.74	1192	22.37	2398	22.36	970	17.36	1988
64.66	2250	64.66	2365	64.66	2494	34.82	2854	39.82	1300	39.82	1159	22.41	2360	22.4	895	17.4	2067
64.82	2324	64.82	2288	64.82	2325	34.9	2881	39.9	1277	39.9	1162	22.45	2366	22.44	912	17.44	2023
64.98	2268	64.98	2220	64.98	2198	34.98	2883	39.98	1237	39.98	1174	22.49	2324	22.48	912	17.48	2114
65.14	2157	65.14	2196	65.14	2167	35.06	2758	40.06	1236	40.06	1180	22.53	2378	22.52	937	17.52	2051
65.3	2138	65.3	2172	65.3	2064	35.14	2866	40.14	1224	40.14	1163	22.57	2436	22.56	925	17.56	2041
65.46	2174	65.46	2093	65.46	1973	35.22	2795	40.22	1266	40.22	1139	22.61	2496	22.6	893	17.6	2012
65.62	2040	65.62	2019	65.62	1912	35.3	2706	40.3	1296	40.3	1268	22.65	2507	22.64	989	17.64	2060
65.78	2048	65.78	2034	65.78	1777	35.38	2736	40.38	1323	40.38	1312	22.69	2408	22.68	936	17.68	2114
65.94	1995	65.94	1884	65.94	1802	35.46	2862	40.46	1380	40.46	1257	22.73	2487	22.72	1025	17.72	2191
66.1	1940	66.1	2020	66.1	1712	35.54	2852	40.54	1305	40.54	1338	22.77	2469	22.76	939	17.76	2172
66.26	1925	66.26	1927	66.26	1787	35.62	2775	40.62	1342	40.62	1343	22.81	2446	22.8	947	17.8	2160
66.42	1838	66.42	1909	66.42	1787	35.7	2814	40.7	1338	40.7	1347	22.85	2449	22.84	955	17.84	2161
66.58	1825	66.58	1826	66.58	1707	35.78	2696	40.78	1385	40.78	1408	22.89	2493	22.88	988	17.88	2135
66.74	1824	66.74	1980	66.74	1634	35.86	2830	40.86	1496	40.86	1395	22.93	2439	22.92	998	17.92	2171
66.9	1722	66.9	1793	66.9	1672	35.94	2799	40.94	1436	40.94	1497	22.97	2424	22.96	979	17.96	2133
67.06	1856	67.06	1848	67.06	1611	36.02	2811	41.02	1469	41.02	1517	23.01	2539	23	962	18	2238
67.22	1745	67.22	1826	67.22	1638	36.1	2809	41.1	1542	41.1	1573	23.05	2507	23.04	951	18.04	2212
67.38	1787	67.38	1793	67.38	1575	36.18	2808	41.18	1561	41.18	1619	23.09	2548	23.08	1005	18.08	2213
67.54	1794	67.54	1723	67.54	1553	36.26	2779	41.26	1676	41.26	1741	23.13	2502	23.12	973	18.12	2275
67.7	1787	67.7	1695	67.7	1618	36.34	2766	41.34	1588	41.34	1622	23.17	2546	23.16	947	18.16	2218
67.86	1740	67.86	1714	67.86	1521	36.42	2736	41.42	1624	41.42	1577	23.21	2529	23.2	1016	18.2	2228
68.02	1669	68.02	1752	68.02	1503	36.5	2791	41.5	1609	41.5	1662	23.25	2397	23.24	1007	18.24	2230
68.18	1712	68.18	1703	68.18	1534	36.58	2741	41.58	1564	41.58	1571	23.29	2398	23.28	938	18.28	2253
68.34	1712	68.34	1681	68.34	1529	36.66	2694	41.66	1522	41.66	1575	23.33	2472	23.32	958	18.32	2328
68.5	1725	68.5	1610	68.5	1457	36.74	2763	41.74	1469	41.74	1574	23.37	2517	23.36	963	18.36	2325
68.66	1593	68.66	1736	68.66	1413	36.82	2663	41.82	1462	41.82	1537	23.41	2435	23.4	909	18.4	2259
68.82	1720	68.82	1628	68.82	1434	36.9	2742	41.9	1464	41.9	1546	23.45	2511	23.44	961	18.44	2295
68.98	1566	68.98	1519	68.98	1430	36.98	2705	41.98	1386	41.98	1463	23.49	2404	23.48	947	18.48	2280
69.14	1585	69.14	1597	69.14	1494	37.06	2603	42.06	1385	42.06	1472	23.53	2434	23.52	1033	18.52	2317
69.3	1644	69.3	1588	69.3	1454	37.14	2641	42.14	1336	42.14	1452	23.57	2472	23.56	963	18.56	2318
69.46	1584	69.46	1621	69.46	1389	37.22	2650	42.22	1448	42.22	1439	23.61	2492	23.6	959	18.6	2262
69.62	1629	69.62	1652	69.62	1519	37.3	2671	42.3	1378	42.3	1362	23.65	2384	23.64	963	18.64	2393
69.78	1631	69.78	1646	69.78	1503	37.38	2590	42.38	1402	42.38	1438	23.69	2548	23.68	996	18.68	2389
69.94	1518	69.94	1527	69.94	1429	37.46	2630	42.46	1358	42.46	1385	23.73	2508	23.72	975	18.72	2381
70.1	1575	70.1	1565	70.1	1449	37.54	2506	42.54	1414	42.54	1331	23.77	2537	23.76	972	18.76	2434
70.26	1609	70.26	1588	70.26	1343	37.62	2469	42.62	1315	42.62	1473	23.81	2461	23.8	1015	18.8	2372
70.42	1522	70.42	1568	70.42	1416	37.7	2381	42.7	1395	42.7	1323	23.85	2472	23.84	944	18.84	2407
70.58	1667	70.58	1577	70.58	1377	37.78	2339	42.78	1416	42.78	1392	23.89	2411	23.88	904	18.88	2448
70.74	1610	70.74	1493	70.74	1409	37.86	2438	42.86	1366	42.86	1318	23.93	2536	23.92	994	18.92	2413
70.9	1628	70.9	1593	70.9	1360	37.94	2426	42.94	1409	42.94	1332	23.97	2447	23.96	1015	18.96	2479
71.06	1552	71.06	1582	71.06	1420	38.02	2338	43.02	1341	43.02	1351	24.01	2489	24	975	19	2435
71.22	1556	71.22	1582	71.22	1366	38.1	2248	43.1	1429	43.1	1341	24.05	2389	24.04	1026	19.04	2424
71.38	1574	71.38	1583	71.38	1404	38.18	2146	43.18	1390	43.18	1334	24.09	2408	24.08	1018	19.08	2563
71.54	1647	71.54	1548	71.54	1354	38.26	2160	43.26	1384	43.26	1284	24.13	2515	24.12	1063	19.12	2480
71.7	1533	71.7	1533	71.7	1289	38.34	2094	43.34	1326	43.34	1271	24.17	2530	24.16	988	19.16	2540
71.86	1502	71.86	1540	71.86	1345	38.42	2110	43.42	1345	43.42	1348	24.21	2465	24.2	995	19.2	2475
72.02	1586	72.02	1559	72.02	1293	38.5	2090	43.5	1313	43.5	1223	24.25	2502	24.24	1037	19.24	2493
72.18	1633	72.18	1511	72.18	1339	38.58	1976	43.58	1348	43.58	1249	24.29	2488	24.28	1063	19.28	2519
72.34	1616	72.34	1500	72.34	1411	38.66	2014	43.66	1400	43.66	1288	24.33	2529	24.32	1055	19.32	2627
72.5	1633	72.5	1616	72.5	1327	38.74	1959	43.74	1363	43.74	1252	24.37	2460	24.36	1112	19.36	2530
72.66	1553	72.66	1554	72.66	1414	38.82	1920	43.82	1419	43.82	1241	24.41	2524	24.4	1147	19.4	2533
72.82	1538	72.82	1553	72.82	1270	38.9	2018	43.9	1375	43.9	1235	24.45	2544	24.44	1173	19.44	2542
72.98	1530	72.98	1522	72.98	1376	38.98	1929	43.98	1416	43.98	1165	24.49	2561	24.48	1153	19.48	2550
73.14	1599	73.14	1560	73.14	1374	39.06	1840	44.06	1293	44.06	1121	24.53	2450	24.52	1165	19.52	2668
73.3	1615	73.3	1540	73.3	1346	39.14	1963	44.14	1392	44.14	1183	24.57	2525	24.56	1162	19.56	2640
73.46	1598	73.46	1495	73.46	1323	39.22	1941	44.22	1384	44.22	1177	24.61	2545	24.6	1152	19.6	2619
73.62	1705	73.62	1639	73.62	1317	39.3	1961	44.3	1410	44.3	1217	24.65	2567	24.64	1195	19.64	2658
73.78	1639	73.78	1558	73.78	1317	39.38	1862	44.38	1355	44.38	1246	24.69	2484	24.68	1191	19.68	2613
73.94	1490	73.94	1565	73.94	1289	39.46	1952	44.46	1402	44.46	1178	24.73	2571	24.72	1132	19.72	2818
74.1	1607	74.1	1602	74.1	1371	39.54	1895	44.54	1270	44.54	1114	24.77	2657	24.76	1213	19.76	2682
74.26	1630	74.26	1557	74.26	1360	39.62	1920	44.62	1249	44.62	1167	24.81	2578	24.8	1234	19.8	2825
74.42	1600	74.42	1558	74.42	1399	39.7	1894	44.7	1207	44.7	1206	24.85	2579	24.84	1236	19.84	2680
74.58	1571	74.58	1542	74.58	1404	39.78	1880	44.78	1257	44.78	1139	24.89	2722	24.88	1304	19.88	2696
74.74	1598	74.74	1599	74.74	1410	39.86	1962	44.86	1295	44.86	1128	24.93	2751	24.92	1368	19.92	2688
74.9	1574	74.9	1562	74.9	1426	39.94	1886	44.94	1300	44.94	1148	24.97	2793	24.96	1492	19.96	2754
75	1444	75	1732	75	1412	40.02	1887	45.02	1261	45.02	1169	25.01	2943	25	1606	20	2618
						40.1	1919	45.1	1280	45.1	1100	25.05	3168	25.04	1761	20.04	2694
						40.18	1920	45.18	1229	45.18	1079	25.09	3391	25.08	2112	20.08	2803
						40.26	1936	45.26	1195	45.26	1137	25.13	3731	25.12	2687	20.12	2734
						40.34	1903	45.34	1314	45.34	1137	25.17	4535	25.16	3321	20.16	2799
						40.42	1974	45.42	1228	45.42	1133	25.21	5207	25.2	4329	20.2	2706
						40.5	1982	45.5	1289	45.5	1125	25.25	5849	25.24	5318	20.24	2761
						40.58	1950	45.58	1281	45.58	1145	25.29	6413	25.28	6466	20.28	2816
						40.66	2013	45.66	1313	45.66	1135	25.33	6204	25.32	7462	20.32	2851
						40.74	1965	45.74	1224	45.74	1157	25.37	5796	25.36	8184	20.36	2835
						40.82	2044	45.82	1259	45.82	1118	25.41	5088	25.4	8838	20.4	2882
						40.9	2062	45.9	1233	45.9	1127	25.45	4441	25.44	9166	20.44	2816
						40.98	2060	45.98	1271	45.98	1155	25.49	3806	25.48	9102	20.48	2870
						41.06	2110	46.06	1247	46.06	1087	25.53	3417	25.52	8976	20.52	2956
						41.14	2185	46.14	1286	46.14	1154	25.57	3183	25.56	8212	20.56	2937
						41.22	2138	46.22	1292	46.22	1169	25.61	3074	25.6	7292	20.6	2905
						41.3	2153	46.3	1254	46.3	1187	25.65	2769	25.64	6116	20.64	2868
						41.38	2257	46.38	1269	46.38	1141	25.69	2716	25.68	4677	20.68	2945
						41.46	2189	46.46	1275	46.46	1185	25.73	2761	25.72	3533	20.72	2946
						41.54	2249	46.54	1252	46.54	1137	25.77	2645	25.76	2707	20.76	2919
						41.62	2254	46.62	1221	46.62	1097	25.81	2513	25.8	2124	20.8	2900
						41.7	2353	46.7	1236	46.7	1180	25.85	2517	25.84	1719	20.84	2919
						41.78	2288	46.78	1261	46.78	1063	25.89	2545	25.88	1521	20.88	3004
						41.86	2330	46.86	1168	46.86	1158	25.93	2441	25.92	1351	20.92	3029
						41.94	2341	46.94	1154	46.94	1096	25.97	2521	25.96	1208	20.96	2984
						42.02	2327	47.02	1154	47.02	1085	26.01	2483	26	1166	21	3067
						42.1	2371	47.1	1212	47.1	1135	26.05	2412	26.04	1111	21.04	3053
						42.18	2388	47.18	1191	47.18	1115	26.09	2479	26.08	1105	21.08	3050
						42.26	2432	47.26	1177	47.26	1092	26.13	2408	26.12	1100	21.12	3045
						42.34	2468	47.34	1214	47.34	1098	26.17	2439	26.16	1039	21.16	3056
						42.42	2493	47.42	1204	47.42	1033	26.21	2514	26.2	1052	21.2	3102
						42.5	2546	47.5	1240	47.5	1088	26.25	2406	26.24	1013	21.24	3095
						42.58	2509	47.58	1311	47.58	1079	26.29	2489	26.28	1045	21.28	3086
						42.66	2569	47.66	1384	47.66	1133	26.33	2414	26.32	974	21.32	3088
						42.74	2548	47.74	1309	47.74	1170	26.37	2331	26.36	904	21.36	3193
						42.82	2781	47.82	1398	47.82	1226	26.41	2347	26.4	965	21.4	3139
						42.9	2668	47.9	1488	47.9	1334	26.45	2411	26.44	933	21.44	3109
						42.98	2775	47.98	1569	47.98	1396	26.49	2365	26.48	922	21.48	3267
						43.06	2864	48.06	1549	48.06	1495	26.53	2346	26.52	953	21.52	3185
						43.14	2872	48.14	1537	48.14	1637	26.57	2231	26.56	890	21.56	3111
						43.22	2919	48.22	1477	48.22	1761	26.61	2378	26.6	944	21.6	3131
						43.3	2820	48.3	1433	48.3	1749	26.65	2332	26.64	958	21.64	3188
						43.38	2871	48.38	1412	48.38	1759	26.69	2389	26.68	913	21.68	3125
						43.46	3004	48.46	1377	48.46	1668	26.73	2251	26.72	939	21.72	3202
						43.54	3049	48.54	1307	48.54	1568	26.77	2268	26.76	917	21.76	3169
						43.62	3015	48.62	1342	48.62	1416	26.81	2313	26.8	875	21.8	3231
						43.7	3017	48.7	1188	48.7	1270	26.85	2398	26.84	888	21.84	3193
						43.78	3010	48.78	1149	48.78	1136	26.89	2401	26.88	875	21.88	3175
						43.86	3149	48.86	1157	48.86	1070	26.93	2374	26.92	900	21.92	3273
						43.94	3013	48.94	1152	48.94	1063	26.97	2350	26.96	918	21.96	3256
						44.02	3027	49.02	1143	49.02	1066	27.01	2174	27	893	22	3282
						44.1	3059	49.1	1153	49.1	1066	27.05	2180	27.04	903	22.04	3186
						44.18	3033	49.18	1161	49.18	1018	27.09	2292	27.08	864	22.08	3269
						44.26	2925	49.26	1084	49.26	1005	27.13	2295	27.12	903	22.12	3340
						44.34	2927	49.34	1055	49.34	987	27.17	2353	27.16	920	22.16	3261
						44.42	3109	49.42	1128	49.42	1012	27.21	2376	27.2	893	22.2	3349
						44.5	2977	49.5	1080	49.5	1014	27.25	2343	27.24	905	22.24	3285
						44.58	2851	49.58	1097	49.58	991	27.29	2324	27.28	860	22.28	3426
						44.66	2906	49.66	1097	49.66	999	27.33	2305	27.32	907	22.32	3320
						44.74	2809	49.74	1163	49.74	1015	27.37	2252	27.36	860	22.36	3333
						44.82	2840	49.82	1107	49.82	929	27.41	2252	27.4	848	22.4	3299
						44.9	2744	49.9	1141	49.9	1048	27.45	2344	27.44	871	22.44	3266
						44.98	2634	49.98	1032	49.98	996	27.49	2228	27.48	866	22.48	3481
						45.06	2641	50.06	1059	50.06	1036	27.53	2397	27.52	818	22.52	3237
						45.14	2610	50.14	1081	50.14	1003	27.57	2307	27.56	834	22.56	3334
						45.22	2501	50.22	1065	50.22	996	27.61	2259	27.6	829	22.6	3397
						45.3	2486	50.3	1127	50.3	954	27.65	2344	27.64	895	22.64	3479
						45.38	2527	50.38	1071	50.38	986	27.69	2195	27.68	831	22.68	3357
						45.46	2511	50.46	1050	50.46	985	27.73	2211	27.72	852	22.72	3369
						45.54	2354	50.54	1091	50.54	953	27.77	2207	27.76	892	22.76	3361
						45.62	2408	50.62	1053	50.62	1034	27.81	2182	27.8	864	22.8	3476
						45.7	2407	50.7	1072	50.7	993	27.85	2163	27.84	849	22.84	3439
						45.78	2347	50.78	1054	50.78	994	27.89	2155	27.88	885	22.88	3549
						45.86	2226	50.86	1067	50.86	1007	27.93	2216	27.92	864	22.92	3409
						45.94	2321	50.94	1054	50.94	975	27.97	2136	27.96	829	22.96	3434
						46.02	2197	51.02	1018	51.02	988	28.01	2240	28	854	23	3532
						46.1	2125	51.1	1092	51.1	949	28.05	2239	28.04	828	23.04	3575
						46.18	2165	51.18	1115	51.18	1077	28.09	2175	28.08	853	23.08	3524
						46.26	2145	51.26	1062	51.26	1036	28.13	2165	28.12	839	23.12	3493
						46.34	2077	51.34	1097	51.34	987	28.17	2148	28.16	819	23.16	3372
						46.42	1996	51.42	1037	51.42	1018	28.21	2225	28.2	791	23.2	3451
						46.5	2076	51.5	1102	51.5	1041	28.25	2284	28.24	773	23.24	3479
						46.58	2041	51.58	1092	51.58	1036	28.29	2147	28.28	809	23.28	3510
						46.66	2116	51.66	1096	51.66	1063	28.33	2120	28.32	813	23.32	3531
						46.74	1945	51.74	1105	51.74	1016	28.37	2223	28.36	825	23.36	3560
						46.82	1884	51.82	1133	51.82	1091	28.41	2094	28.4	839	23.4	3524
						46.9	1951	51.9	1151	51.9	1104	28.45	2161	28.44	836	23.44	3462
						46.98	1887	51.98	1173	51.98	1103	28.49	2156	28.48	757	23.48	3566
						47.06	1888	52.06	1106	52.06	1105	28.53	2025	28.52	836	23.52	3594
						47.14	1810	52.14	1176	52.14	1116	28.57	2063	28.56	820	23.56	3562
						47.22	1884	52.22	1099	52.22	1101	28.61	2125	28.6	824	23.6	3511
						47.3	1780	52.3	1127	52.3	1100	28.65	2137	28.64	786	23.64	3521
						47.38	1873	52.38	1104	52.38	1085	28.69	2102	28.68	792	23.68	3591
						47.46	1846	52.46	1146	52.46	1089	28.73	2081	28.72	807	23.72	3662
						47.54	1820	52.54	1137	52.54	1098	28.77	2162	28.76	820	23.76	3621
						47.62	1781	52.62	1080	52.62	1045	28.81	2079	28.8	807	23.8	3514
						47.7	1710	52.7	1168	52.7	1105	28.85	2056	28.84	794	23.84	3628
						47.78	1792	52.78	1146	52.78	1062	28.89	2073	28.88	764	23.88	3574
						47.86	1891	52.86	1212	52.86	1056	28.93	2119	28.92	738	23.92	3527
						47.94	1756	52.94	1077	52.94	1127	28.97	2051	28.96	779	23.96	3558
						48.02	1777	53.02	1153	53.02	1096	29.01	2076	29	732	24	3567
						48.1	1725	53.1	1148	53.1	1105	29.05	2005	29.04	753	24.04	3545
						48.18	1714	53.18	1204	53.18	1174	29.09	2110	29.08	769	24.08	3694
						48.26	1765	53.26	1153	53.26	1162	29.13	2041	29.12	775	24.12	3615
						48.34	1730	53.34	1206	53.34	1111	29.17	2134	29.16	768	24.16	3727
						48.42	1705	53.42	1269	53.42	1163	29.21	2045	29.2	722	24.2	3610
						48.5	1642	53.5	1249	53.5	1219	29.25	2016	29.24	802	24.24	3581
						48.58	1710	53.58	1273	53.58	1241	29.29	1969	29.28	757	24.28	3732
						48.66	1694	53.66	1352	53.66	1289	29.33	2014	29.32	707	24.32	3704
						48.74	1683	53.74	1384	53.74	1328	29.37	2047	29.36	729	24.36	3710
						48.82	1712	53.82	1405	53.82	1322	29.41	2051	29.4	829	24.4	3814
						48.9	1599	53.9	1408	53.9	1404	29.45	2122	29.44	766	24.44	3760
						48.98	1570	53.98	1547	53.98	1444	29.49	2051	29.48	809	24.48	3861
						49.06	1589	54.06	1600	54.06	1474	29.53	2083	29.52	780	24.52	3852
						49.14	1595	54.14	1675	54.14	1515	29.57	2082	29.56	796	24.56	3844
						49.22	1700	54.22	1658	54.22	1564	29.61	1960	29.6	747	24.6	3874
						49.3	1616	54.3	1787	54.3	1508	29.65	2006	29.64	757	24.64	3929
						49.38	1611	54.38	1804	54.38	1583	29.69	2012	29.68	793	24.68	3929
						49.46	1653	54.46	1895	54.46	1699	29.73	2032	29.72	751	24.72	4004
						49.54	1559	54.54	1866	54.54	1734	29.77	2021	29.76	727	24.76	3988
						49.62	1514	54.62	1972	54.62	1627	29.81	1977	29.8	757	24.8	3978
						49.7	1601	54.7	1843	54.7	1704	29.85	1947	29.84	728	24.84	4220
						49.78	1610	54.78	1894	54.78	1693	29.89	1900	29.88	776	24.88	4218
						49.86	1566	54.86	1867	54.86	1826	29.93	1921	29.92	780	24.92	4307
						49.94	1590	54.94	1822	54.94	1710	29.97	2033	29.96	758	24.96	4360
						50.02	1536	55.02	1806	55.02	1666	30.01	1966	30	776	25	4476
						50.1	1645	55.1	1723	55.1	1667	30.05	1860	30.04	780	25.04	4735
						50.18	1606	55.18	1690	55.18	1652	30.09	1937	30.08	731	25.08	4961
						50.26	1586	55.26	1666	55.26	1531	30.13	1908	30.12	826	25.12	5405
						50.34	1580	55.34	1611	55.34	1488	30.17	2007	30.16	694	25.16	5995
						50.42	1583	55.42	1529	55.42	1545	30.21	1979	30.2	744	25.2	6681
						50.5	1606	55.5	1559	55.5	1581	30.25	1943	30.24	756	25.24	7706
						50.58	1551	55.58	1474	55.58	1479	30.29	1873	30.28	716	25.28	8806
						50.66	1466	55.66	1500	55.66	1416	30.33	1995	30.32	791	25.32	9892
						50.74	1527	55.74	1432	55.74	1429	30.37	1978	30.36	764	25.36	10826
						50.82	1621	55.82	1489	55.82	1459	30.41	1942	30.4	760	25.4	11766
						50.9	1577	55.9	1511	55.9	1468	30.45	1929	30.44	740	25.44	12244
						50.98	1520	55.98	1451	55.98	1407	30.49	1878	30.48	720	25.48	12385
						51.06	1544	56.06	1476	56.06	1368	30.53	1964	30.52	691	25.52	12293
						51.14	1528	56.14	1504	56.14	1400	30.57	1902	30.56	694	25.56	11936
						51.22	1615	56.22	1503	56.22	1314	30.61	1944	30.6	749	25.6	11290
						51.3	1577	56.3	1451	56.3	1278	30.65	1920	30.64	692	25.64	10444
						51.38	1571	56.38	1471	56.38	1277	30.69	1956	30.68	712	25.68	9199
						51.46	1605	56.46	1462	56.46	1321	30.73	1865	30.72	675	25.72	7956
						51.54	1555	56.54	1467	56.54	1235	30.77	1921	30.76	692	25.76	7064
						51.62	1563	56.62	1424	56.62	1281	30.81	1851	30.8	725	25.8	6113
						51.7	1569	56.7	1397	56.7	1193	30.85	1912	30.84	732	25.84	5574
						51.78	1603	56.78	1311	56.78	1197	30.89	1934	30.88	658	25.88	5089
						51.86	1533	56.86	1300	56.86	1175	30.93	1917	30.92	703	25.92	4678
						51.94	1574	56.94	1335	56.94	1213	30.97	1884	30.96	750	25.96	4566
						52.02	1550	57.02	1331	57.02	1211	31.01	1911	31	748	26	4423
						52.1	1570	57.1	1269	57.1	1139	31.05	1863	31.04	680	26.04	4232
						52.18	1464	57.18	1241	57.18	1100	31.09	1869	31.08	697	26.08	4222
						52.26	1504	57.26	1218	57.26	1109	31.13	1890	31.12	683	26.12	4026
						52.34	1605	57.34	1168	57.34	1150	31.17	1824	31.16	703	26.16	3942
						52.42	1541	57.42	1238	57.42	1098	31.21	1847	31.2	720	26.2	4006
						52.5	1574	57.5	1223	57.5	1134	31.25	1814	31.24	732	26.24	3839
						52.58	1539	57.58	1158	57.58	1133	31.29	1848	31.28	679	26.28	3803
						52.66	1494	57.66	1156	57.66	1074	31.33	1895	31.32	679	26.32	3802
						52.74	1592	57.74	1175	57.74	1035	31.37	1869	31.36	689	26.36	3741
						52.82	1546	57.82	1090	57.82	1051	31.41	1784	31.4	685	26.4	3696
						52.9	1621	57.9	1176	57.9	1060	31.45	1925	31.44	645	26.44	3754
						52.98	1529	57.98	1175	57.98	1106	31.49	1851	31.48	677	26.48	3640
						53.06	1598	58.06	1171	58.06	1058	31.53	1877	31.52	644	26.52	3612
						53.14	1509	58.14	1058	58.14	1032	31.57	1826	31.56	709	26.56	3758
						53.22	1555	58.22	1057	58.22	1045	31.61	1787	31.6	674	26.6	3592
						53.3	1561	58.3	1078	58.3	1001	31.65	1833	31.64	694	26.64	3580
						53.38	1537	58.38	1080	58.38	1047	31.69	1883	31.68	659	26.68	3700
						53.46	1673	58.46	1065	58.46	1029	31.73	1776	31.72	612	26.72	3593
						53.54	1567	58.54	1076	58.54	1094	31.77	1828	31.76	683	26.76	3545
						53.62	1572	58.62	1089	58.62	985	31.81	1750	31.8	694	26.8	3721
						53.7	1610	58.7	1087	58.7	945	31.85	1797	31.84	652	26.84	3587
						53.78	1640	58.78	1049	58.78	1028	31.89	1755	31.88	660	26.88	3553
						53.86	1727	58.86	1058	58.86	1035	31.93	1773	31.92	676	26.92	3615
						53.94	1623	58.94	1166	58.94	1040	31.97	1732	31.96	650	26.96	3553
						54.02	1761	59.02	1073	59.02	1049	32.01	1685	32	665	27	3598
						54.1	1692	59.1	1173	59.1	1014	32.05	1728	32.04	642	27.04	3532
						54.18	1751	59.18	1171	59.18	1030	32.09	1853	32.08	649	27.08	3522
						54.26	1726	59.26	1174	59.26	1038	32.13	1765	32.12	688	27.12	3724
						54.34	1738	59.34	1180	59.34	1124	32.17	1809	32.16	656	27.16	3613
						54.42	1754	59.42	1176	59.42	1176	32.21	1623	32.2	654	27.2	3585
						54.5	1852	59.5	1147	59.5	1121	32.25	1730	32.24	728	27.24	3634
						54.58	1839	59.58	1230	59.58	1183	32.29	1693	32.28	641	27.28	3626
						54.66	1888	59.66	1166	59.66	1129	32.33	1689	32.32	645	27.32	3817
						54.74	1817	59.74	1180	59.74	1202	32.37	1722	32.36	650	27.36	3854
						54.82	1879	59.82	1156	59.82	1187	32.41	1698	32.4	593	27.4	3709
						54.9	1859	59.9	1197	59.9	1170	32.45	1711	32.44	638	27.44	3874
						54.98	1863	59.98	1288	59.98	1142	32.49	1630	32.48	619	27.48	3830
						55.06	1818	60.06	1081	60.06	1111	32.53	1758	32.52	623	27.52	3748
						55.14	1774	60.14	1175	60.14	1035	32.57	1669	32.56	622	27.56	3735
						55.22	1747	60.22	1174	60.22	1032	32.61	1740	32.6	662	27.6	4002
						55.3	1764	60.3	1124	60.3	1067	32.65	1647	32.64	666	27.64	3902
						55.38	1786	60.38	1193	60.38	1110	32.69	1635	32.68	592	27.68	3880
						55.46	1717	60.46	1138	60.46	1089	32.73	1621	32.72	637	27.72	3832
						55.54	1769	60.54	1095	60.54	1013	32.77	1728	32.76	580	27.76	3902
						55.62	1735	60.62	1161	60.62	1020	32.81	1682	32.8	579	27.8	3817
						55.7	1742	60.7	1157	60.7	1006	32.85	1701	32.84	613	27.84	3864
						55.78	1759	60.78	1066	60.78	1000	32.89	1633	32.88	616	27.88	3762
						55.86	1757	60.86	1112	60.86	1014	32.93	1589	32.92	654	27.92	3567
						55.94	1725	60.94	1088	60.94	978	32.97	1681	32.96	630	27.96	3611
						56.02	1674	61.02	1093	61.02	1001	33.01	1659	33	573	28	3461
						56.1	1692	61.1	1075	61.1	993	33.05	1686	33.04	587	28.04	3518
						56.18	1749	61.18	1089	61.18	963	33.09	1653	33.08	619	28.08	3408
						56.26	1678	61.26	1133	61.26	997	33.13	1560	33.12	596	28.12	3437
						56.34	1652	61.34	1018	61.34	1025	33.17	1618	33.16	560	28.16	3450
						56.42	1665	61.42	1081	61.42	998	33.21	1600	33.2	576	28.2	3388
						56.5	1682	61.5	1064	61.5	990	33.25	1565	33.24	580	28.24	3273
						56.58	1697	61.58	1034	61.58	990	33.29	1629	33.28	571	28.28	3285
						56.66	1604	61.66	1062	61.66	1005	33.33	1474	33.32	539	28.32	3197
						56.74	1621	61.74	1068	61.74	1021	33.37	1545	33.36	606	28.36	3272
						56.82	1628	61.82	1131	61.82	1016	33.41	1516	33.4	609	28.4	3162
						56.9	1654	61.9	1063	61.9	1007	33.45	1599	33.44	583	28.44	3100
						56.98	1612	61.98	1092	61.98	1005	33.49	1504	33.48	583	28.48	3175
						57.06	1592	62.06	1096	62.06	993	33.53	1547	33.52	550	28.52	3175
						57.14	1667	62.14	1097	62.14	975	33.57	1491	33.56	590	28.56	3142
						57.22	1639	62.22	1138	62.22	1065	33.61	1565	33.6	568	28.6	3154
						57.3	1597	62.3	1196	62.3	1042	33.65	1467	33.64	574	28.64	3161
						57.38	1623	62.38	1113	62.38	1012	33.69	1482	33.68	568	28.68	3121
						57.46	1600	62.46	1072	62.46	1024	33.73	1518	33.72	527	28.72	3051
						57.54	1566	62.54	1210	62.54	1098	33.77	1534	33.76	588	28.76	3023
						57.62	1561	62.62	1088	62.62	1011	33.81	1505	33.8	568	28.8	2955
						57.7	1601	62.7	1154	62.7	1072	33.85	1483	33.84	518	28.84	3105
						57.78	1617	62.78	1096	62.78	1090	33.89	1524	33.88	573	28.88	2979
						57.86	1623	62.86	1141	62.86	1051	33.93	1525	33.92	545	28.92	3033
						57.94	1570	62.94	1110	62.94	1032	33.97	1416	33.96	521	28.96	2988
						58.02	1568	63.02	1137	63.02	1075	34.01	1499	34	553	29	3002
						58.1	1554	63.1	1147	63.1	1074	34.05	1421	34.04	547	29.04	3002
						58.18	1561	63.18	1085	63.18	1108	34.09	1433	34.08	515	29.08	2997
						58.26	1559	63.26	1131	63.26	1124	34.13	1492	34.12	532	29.12	3070
						58.34	1476	63.34	1133	63.34	1101	34.17	1441	34.16	525	29.16	2987
						58.42	1554	63.42	1129	63.42	1172	34.21	1495	34.2	536	29.2	2983
						58.5	1566	63.5	1143	63.5	1144	34.25	1387	34.24	542	29.24	2974
						58.58	1565	63.58	1151	63.58	1135	34.29	1441	34.28	556	29.28	2941
						58.66	1550	63.66	1145	63.66	1126	34.33	1445	34.32	500	29.32	2974
						58.74	1545	63.74	1197	63.74	1144	34.37	1422	34.36	570	29.36	3021
						58.82	1657	63.82	1218	63.82	1161	34.41	1469	34.4	532	29.4	2963
						58.9	1546	63.9	1157	63.9	1230	34.45	1418	34.44	504	29.44	2919
						58.98	1559	63.98	1210	63.98	1178	34.49	1431	34.48	531	29.48	2921
						59.06	1634	64.06	1144	64.06	1178	34.53	1423	34.52	497	29.52	2912
						59.14	1716	64.14	1257	64.14	1235	34.57	1415	34.56	489	29.56	3010
						59.22	1623	64.22	1195	64.22	1215	34.61	1401	34.6	548	29.6	2955
						59.3	1584	64.3	1185	64.3	1220	34.65	1395	34.64	518	29.64	3018
						59.38	1644	64.38	1173	64.38	1267	34.69	1376	34.68	507	29.68	2917
						59.46	1608	64.46	1188	64.46	1279	34.73	1315	34.72	493	29.72	2974
						59.54	1649	64.54	1149	64.54	1346	34.77	1478	34.76	473	29.76	2947
						59.62	1601	64.62	1212	64.62	1309	34.81	1372	34.8	532	29.8	2914
						59.7	1669	64.7	1161	64.7	1308	34.85	1369	34.84	479	29.84	2889
						59.78	1662	64.78	1264	64.78	1305	34.89	1354	34.88	493	29.88	2919
						59.86	1665	64.86	1238	64.86	1353	34.93	1310	34.92	523	29.92	2820
						59.94	1646	64.94	1266	64.94	1422	34.97	1362	34.96	544	29.96	2746
						60.02	1665	65.02	1202	65.02	1388	35.01	1291	35	505	30	2850
						60.1	1729	65.1	1178	65.1	1386	35.05	1370	35.04	532	30.04	2897
						60.18	1673	65.18	1179	65.18	1298	35.09	1325	35.08	470	30.08	2830
						60.26	1640	65.26	1132	65.26	1331	35.13	1325	35.12	501	30.12	2838
						60.34	1739	65.34	1209	65.34	1239	35.17	1319	35.16	500	30.16	2912
						60.42	1735	65.42	1104	65.42	1294	35.21	1313	35.2	489	30.2	2858
						60.5	1708	65.5	1158	65.5	1294	35.25	1355	35.24	517	30.24	2918
						60.58	1708	65.58	1117	65.58	1262	35.29	1354	35.28	508	30.28	2866
						60.66	1657	65.66	1091	65.66	1283	35.33	1275	35.32	489	30.32	2878
						60.74	1728	65.74	1147	65.74	1234	35.37	1275	35.36	479	30.36	2716
						60.82	1741	65.82	1125	65.82	1209	35.41	1313	35.4	483	30.4	2849
						60.9	1815	65.9	1054	65.9	1147	35.45	1281	35.44	465	30.44	2781
						60.98	1739	65.98	1074	65.98	1110	35.49	1312	35.48	451	30.48	2718
						61.06	1820	66.06	1066	66.06	1098	35.53	1297	35.52	482	30.52	2763
						61.14	1762	66.14	1026	66.14	1113	35.57	1229	35.56	481	30.56	2783
						61.22	1766	66.22	992	66.22	1097	35.61	1239	35.6	500	30.6	2849
						61.3	1770	66.3	1048	66.3	1157	35.65	1256	35.64	471	30.64	2810
						61.38	1769	66.38	1033	66.38	1061	35.69	1345	35.68	468	30.68	2724
						61.46	1815	66.46	1016	66.46	1087	35.73	1248	35.72	470	30.72	2773
						61.54	1838	66.54	963	66.54	1021	35.77	1238	35.76	443	30.76	2768
						61.62	1765	66.62	1043	66.62	1085	35.81	1269	35.8	456	30.8	2712
						61.7	1829	66.7	944	66.7	1047	35.85	1322	35.84	440	30.84	2738
						61.78	1903	66.78	1021	66.78	1007	35.89	1276	35.88	488	30.88	2729
						61.86	1835	66.86	956	66.86	1018	35.93	1232	35.92	463	30.92	2632
						61.94	1846	66.94	953	66.94	1086	35.97	1254	35.96	472	30.96	2739
						62.02	1890	67.02	931	67.02	1111	36.01	1196	36	454	31	2820
						62.1	1924	67.1	1007	67.1	1049	36.05	1280	36.04	484	31.04	2710
						62.18	1872	67.18	961	67.18	972	36.09	1233	36.08	481	31.08	2729
						62.26	1916	67.26	1011	67.26	963	36.13	1317	36.12	499	31.12	2722
						62.34	1911	67.34	965	67.34	1040	36.17	1174	36.16	472	31.16	2656
						62.42	1964	67.42	967	67.42	972	36.21	1276	36.2	457	31.2	2690
						62.5	1961	67.5	974	67.5	1027	36.25	1203	36.24	489	31.24	2720
						62.58	2070	67.58	963	67.58	956	36.29	1270	36.28	475	31.28	2619
						62.66	1956	67.66	991	67.66	994	36.33	1217	36.32	462	31.32	2691
						62.74	1983	67.74	989	67.74	956	36.37	1156	36.36	466	31.36	2642
						62.82	2009	67.82	1041	67.82	969	36.41	1239	36.4	440	31.4	2576
						62.9	2055	67.9	982	67.9	950	36.45	1176	36.44	473	31.44	2663
						62.98	2057	67.98	998	67.98	981	36.49	1182	36.48	464	31.48	2634
						63.06	2149	68.06	1002	68.06	946	36.53	1198	36.52	463	31.52	2575
						63.14	2054	68.14	932	68.14	991	36.57	1133	36.56	449	31.56	2592
						63.22	2084	68.22	1007	68.22	933	36.61	1169	36.6	463	31.6	2666
						63.3	2025	68.3	1028	68.3	978	36.65	1164	36.64	434	31.64	2593
						63.38	2107	68.38	1042	68.38	912	36.69	1202	36.68	452	31.68	2698
						63.46	2162	68.46	1002	68.46	922	36.73	1196	36.72	417	31.72	2549
						63.54	2175	68.54	1025	68.54	887	36.77	1188	36.76	461	31.76	2469
						63.62	2227	68.62	1015	68.62	945	36.81	1188	36.8	491	31.8	2558
						63.7	2081	68.7	1073	68.7	871	36.85	1172	36.84	454	31.84	2556
						63.78	2059	68.78	997	68.78	921	36.89	1130	36.88	438	31.88	2489
						63.86	2094	68.86	1060	68.86	896	36.93	1186	36.92	452	31.92	2554
						63.94	2097	68.94	1118	68.94	936	36.97	1181	36.96	471	31.96	2461
						64.02	2051	69.02	1050	69.02	966	37.01	1171	37	452	32	2590
						64.1	2054	69.1	1070	69.1	913	37.05	1138	37.04	407	32.04	2525
						64.18	2028	69.18	1119	69.18	924	37.09	1191	37.08	438	32.08	2430
						64.26	2103	69.26	1069	69.26	952	37.13	1176	37.12	431	32.12	2538
						64.34	2054	69.34	997	69.34	942	37.17	1226	37.16	428	32.16	2501
						64.42	2028	69.42	976	69.42	916	37.21	1270	37.2	435	32.2	2386
						64.5	2026	69.5	952	69.5	896	37.25	1221	37.24	478	32.24	2429
						64.58	2010	69.58	958	69.58	890	37.29	1236	37.28	442	32.28	2536
						64.66	1971	69.66	947	69.66	816	37.33	1197	37.32	413	32.32	2403
						64.74	1985	69.74	962	69.74	857	37.37	1202	37.36	446	32.36	2397
						64.82	1923	69.82	920	69.82	835	37.41	1167	37.4	428	32.4	2459
						64.9	1796	69.9	929	69.9	876	37.45	1242	37.44	405	32.44	2400
						64.98	1848	69.98	899	69.98	815	37.49	1228	37.48	383	32.48	2378
						65.06	1765	70.06	910	70.06	838	37.53	1218	37.52	460	32.52	2441
						65.14	1727	70.14	890	70.14	792	37.57	1142	37.56	424	32.56	2535
						65.22	1723	70.22	820	70.22	817	37.61	1180	37.6	414	32.6	2401
						65.3	1747	70.3	872	70.3	776	37.65	1201	37.64	421	32.64	2442
						65.38	1764	70.38	837	70.38	802	37.69	1126	37.68	424	32.68	2449
						65.46	1615	70.46	879	70.46	741	37.73	1093	37.72	429	32.72	2413
						65.54	1688	70.54	862	70.54	784	37.77	1173	37.76	393	32.76	2343
						65.62	1560	70.62	822	70.62	768	37.81	1115	37.8	450	32.8	2416
						65.7	1577	70.7	849	70.7	752	37.85	1129	37.84	413	32.84	2344
						65.78	1514	70.78	771	70.78	804	37.89	1109	37.88	369	32.88	2422
						65.86	1532	70.86	842	70.86	781	37.93	1159	37.92	387	32.92	2409
						65.94	1465	70.94	843	70.94	776	37.97	1180	37.96	409	32.96	2333
						66.02	1471	71.02	816	71.02	750	38.01	1150	38	378	33	2270
						66.1	1534	71.1	823	71.1	783	38.05	1149	38.04	434	33.04	2290
						66.18	1490	71.18	808	71.18	663	38.09	1125	38.08	378	33.08	2358
						66.26	1410	71.26	815	71.26	755	38.13	1142	38.12	408	33.12	2268
						66.34	1430	71.34	763	71.34	771	38.17	1146	38.16	394	33.16	2267
						66.42	1439	71.42	849	71.42	772	38.21	1173	38.2	429	33.2	2346
						66.5	1398	71.5	822	71.5	755	38.25	1199	38.24	433	33.24	2216
						66.58	1371	71.58	835	71.58	773	38.29	1188	38.28	456	33.28	2291
						66.66	1375	71.66	824	71.66	762	38.33	1275	38.32	445	33.32	2251
						66.74	1371	71.74	861	71.74	719	38.37	1274	38.36	510	33.36	2274
						66.82	1387	71.82	785	71.82	720	38.41	1428	38.4	472	33.4	2159
						66.9	1378	71.9	803	71.9	698	38.45	1431	38.44	506	33.44	2284
						66.98	1302	71.98	771	71.98	746	38.49	1516	38.48	514	33.48	2217
						67.06	1306	72.06	798	72.06	757	38.53	1610	38.52	573	33.52	2192
						67.14	1320	72.14	826	72.14	737	38.57	1565	38.56	579	33.56	2243
						67.22	1342	72.22	799	72.22	721	38.61	1555	38.6	607	33.6	2305
						67.3	1326	72.3	719	72.3	745	38.65	1566	38.64	618	33.64	2190
						67.38	1262	72.38	863	72.38	742	38.69	1442	38.68	630	33.68	2141
						67.46	1259	72.46	792	72.46	747	38.73	1366	38.72	596	33.72	2168
						67.54	1344	72.54	821	72.54	727	38.77	1303	38.76	614	33.76	2178
						67.62	1285	72.62	798	72.62	710	38.81	1232	38.8	628	33.8	2130
						67.7	1267	72.7	770	72.7	659	38.85	1141	38.84	659	33.84	2062
						67.78	1246	72.78	790	72.78	715	38.89	1044	38.88	651	33.88	2072
						67.86	1302	72.86	804	72.86	684	38.93	1102	38.92	598	33.92	2131
						67.94	1284	72.94	776	72.94	678	38.97	1064	38.96	581	33.96	2156
						68.02	1206	73.02	802	73.02	772	39.01	1117	39	580	34	2058
						68.1	1255	73.1	735	73.1	675	39.05	1070	39.04	549	34.04	2133
						68.18	1300	73.18	740	73.18	692	39.09	1059	39.08	521	34.08	2048
						68.26	1289	73.26	742	73.26	651	39.13	1032	39.12	522	34.12	2056
						68.34	1211	73.34	738	73.34	660	39.17	1023	39.16	468	34.16	2111
						68.42	1255	73.42	740	73.42	685	39.21	1084	39.2	428	34.2	2018
						68.5	1214	73.5	759	73.5	680	39.25	1018	39.24	405	34.24	2108
						68.58	1119	73.58	741	73.58	690	39.29	1019	39.28	396	34.28	2013
						68.66	1208	73.66	683	73.66	669	39.33	1019	39.32	413	34.32	2053
						68.74	1190	73.74	683	73.74	695	39.37	1002	39.36	390	34.36	2041
						68.82	1229	73.82	747	73.82	677	39.41	1005	39.4	374	34.4	2021
						68.9	1278	73.9	684	73.9	635	39.45	1005	39.44	401	34.44	2084
						68.98	1238	73.98	654	73.98	644	39.49	1003	39.48	375	34.48	2147
						69.06	1147	74.06	729	74.06	670	39.53	993	39.52	373	34.52	1971
						69.14	1158	74.14	704	74.14	642	39.57	1018	39.56	405	34.56	2010
						69.22	1185	74.22	684	74.22	708	39.61	997	39.6	344	34.6	1979
						69.3	1153	74.3	659	74.3	625	39.65	971	39.64	361	34.64	1933
						69.38	1164	74.38	742	74.38	664	39.69	1020	39.68	358	34.68	1949
						69.46	1149	74.46	733	74.46	631	39.73	984	39.72	405	34.72	2035
						69.54	1137	74.54	739	74.54	639	39.77	990	39.76	378	34.76	1962
						69.62	1132	74.62	742	74.62	625	39.81	1034	39.8	321	34.8	2047
						69.7	1143	74.7	725	74.7	657	39.85	1003	39.84	340	34.84	1945
						69.78	1143	74.78	691	74.78	667	39.89	1015	39.88	384	34.88	1900
						69.86	1182	74.86	688	74.86	630	39.93	1026	39.92	373	34.92	1948
						69.94	1111	74.94	751	74.94	660	39.97	1037	39.96	370	34.96	1962
						75	702	75	646	40.01	998	40.01	998	40	342	35	1950
										40.05	1044	40.05	1044	40.04	338	35.04	1963
										40.09	961	40.09	961	40.08	401	35.08	1893
										40.13	980	40.13	980	40.12	328	35.12	1959
										40.17	990	40.17	990	40.16	370	35.16	1934
										40.21	983	40.21	983	40.2	374	35.2	1937
										40.25	952	40.25	952	40.24	349	35.24	1908
										40.29	952	40.29	952	40.28	338	35.28	1891
										40.33	990	40.33	990	40.32	360	35.32	1931
										40.37	933	40.37	933	40.36	343	35.36	1892
										40.41	1015	40.41	1015	40.4	386	35.4	1826
										40.45	937	40.45	937	40.44	384	35.44	1946
										40.49	1011	40.49	1011	40.48	372	35.48	1771
										40.53	1017	40.53	1017	40.52	374	35.52	1856
										40.57	987	40.57	987	40.56	347	35.56	1783
										40.61	979	40.61	979	40.6	379	35.6	1842
										40.65	933	40.65	933	40.64	359	35.64	1833
										40.69	977	40.69	977	40.68	352	35.68	1903
										40.73	1006	40.73	1006	40.72	353	35.72	1842
										40.77	968	40.77	968	40.76	337	35.76	1866
										40.81	1003	40.81	1003	40.8	401	35.8	1843
										40.85	989	40.85	989	40.84	351	35.84	1859
										40.89	1025	40.89	1025	40.88	372	35.88	1854
										40.93	956	40.93	956	40.92	331	35.92	1853
										40.97	977	40.97	977	40.96	346	35.96	1868
										41.01	1005	41.01	1005	41	396	36	1853
										41.05	1038	41.05	1038	41.04	344	36.04	1813
										41.09	926	41.09	926	41.08	327	36.08	1762
										41.13	954	41.13	954	41.12	347	36.12	1850
										41.17	1025	41.17	1025	41.16	358	36.16	1761
										41.21	981	41.21	981	41.2	367	36.2	1745
										41.25	953	41.25	953	41.24	382	36.24	1768
										41.29	1008	41.29	1008	41.28	351	36.28	1840
										41.33	998	41.33	998	41.32	399	36.32	1717
										41.37	982	41.37	982	41.36	405	36.36	1829
										41.41	987	41.41	987	41.4	381	36.4	1802
										41.45	1053	41.45	1053	41.44	354	36.44	1756
										41.49	964	41.49	964	41.48	381	36.48	1727
										41.53	1012	41.53	1012	41.52	395	36.52	1764
										41.57	1032	41.57	1032	41.56	358	36.56	1716
										41.61	988	41.61	988	41.6	342	36.6	1793
										41.65	994	41.65	994	41.64	371	36.64	1798
										41.69	1027	41.69	1027	41.68	390	36.68	1695
										41.73	1027	41.73	1027	41.72	380	36.72	1731
										41.77	953	41.77	953	41.76	358	36.76	1800
										41.81	956	41.81	956	41.8	353	36.8	1740
										41.85	979	41.85	979	41.84	373	36.84	1786
										41.89	1043	41.89	1043	41.88	373	36.88	1681
										41.93	968	41.93	968	41.92	358	36.92	1731
										41.97	954	41.97	954	41.96	338	36.96	1737
										42.01	989	42.01	989	42	341	37	1763
										42.05	990	42.05	990	42.04	349	37.04	1797
										42.09	964	42.09	964	42.08	380	37.08	1789
										42.13	1005	42.13	1005	42.12	355	37.12	1821
										42.17	945	42.17	945	42.16	350	37.16	1796
										42.21	1026	42.21	1026	42.2	352	37.2	1783
										42.25	965	42.25	965	42.24	345	37.24	1863
										42.29	986	42.29	986	42.28	356	37.28	1696
										42.33	974	42.33	974	42.32	372	37.32	1850
										42.37	960	42.37	960	42.36	359	37.36	1758
										42.41	1008	42.41	1008	42.4	388	37.4	1861
										42.45	932	42.45	932	42.44	361	37.44	1772
										42.49	972	42.49	972	42.48	346	37.48	1906
										42.53	979	42.53	979	42.52	329	37.52	1873
										42.57	955	42.57	955	42.56	348	37.56	1861
										42.61	1007	42.61	1007	42.6	383	37.6	1788
										42.65	951	42.65	951	42.64	352	37.64	1808
										42.69	961	42.69	961	42.68	346	37.68	1835
										42.73	979	42.73	979	42.72	347	37.72	1829
										42.77	943	42.77	943	42.76	399	37.76	1833
										42.81	1019	42.81	1019	42.8	341	37.8	1829
										42.85	975	42.85	975	42.84	328	37.84	1766
										42.89	968	42.89	968	42.88	347	37.88	1817
										42.93	964	42.93	964	42.92	350	37.92	1863
										42.97	985	42.97	985	42.96	366	37.96	1786
										43.01	1051	43.01	1051	43	346	38	1724
										43.05	1024	43.05	1024	43.04	316	38.04	1721
										43.09	1003	43.09	1003	43.08	369	38.08	1768
										43.13	1004	43.13	1004	43.12	374	38.12	1749
										43.17	938	43.17	938	43.16	380	38.16	1713
										43.21	1003	43.21	1003	43.2	385	38.2	1757
										43.25	968	43.25	968	43.24	357	38.24	1821
										43.29	959	43.29	959	43.28	380	38.28	1810
										43.33	971	43.33	971	43.32	377	38.32	1885
										43.37	972	43.37	972	43.36	369	38.36	1850
										43.41	956	43.41	956	43.4	362	38.4	1926
										43.45	972	43.45	972	43.44	355	38.44	2018
										43.49	985	43.49	985	43.48	342	38.48	1960
										43.53	962	43.53	962	43.52	363	38.52	2089
										43.57	944	43.57	944	43.56	348	38.56	2092
										43.61	942	43.61	942	43.6	368	38.6	2182
										43.65	988	43.65	988	43.64	366	38.64	2208
										43.69	930	43.69	930	43.68	389	38.68	2339
										43.73	927	43.73	927	43.72	387	38.72	2264
										43.77	984	43.77	984	43.76	345	38.76	2389
										43.81	995	43.81	995	43.8	364	38.8	2433
										43.85	1013	43.85	1013	43.84	376	38.84	2371
										43.89	965	43.89	965	43.88	370	38.88	2385
										43.93	998	43.93	998	43.92	354	38.92	2359
										43.97	928	43.97	928	43.96	329	38.96	2269
										44.01	912	44.01	912	44	387	39	2279
										44.05	928	44.05	928	44.04	362	39.04	2151
										44.09	967	44.09	967	44.08	339	39.08	1986
										44.13	938	44.13	938	44.12	346	39.12	2068
										44.17	885	44.17	885	44.16	361	39.16	1857
										44.21	1009	44.21	1009	44.2	344	39.2	1833
										44.25	925	44.25	925	44.24	373	39.24	1779
										44.29	962	44.29	962	44.28	374	39.28	1717
										44.33	968	44.33	968	44.32	338	39.32	1699
										44.37	940	44.37	940	44.36	346	39.36	1649
										44.41	975	44.41	975	44.4	351	39.4	1649
										44.45	906	44.45	906	44.44	367	39.44	1584
										44.49	932	44.49	932	44.48	359	39.48	1669
										44.53	928	44.53	928	44.52	332	39.52	1609
										44.57	913	44.57	913	44.56	347	39.56	1625
										44.61	974	44.61	974	44.6	347	39.6	1546
										44.65	947	44.65	947	44.64	374	39.64	1577
										44.69	919	44.69	919	44.68	334	39.68	1573
										44.73	945	44.73	945	44.72	324	39.72	1569
										44.77	961	44.77	961	44.76	348	39.76	1584
										44.81	944	44.81	944	44.8	333	39.8	1532
										44.85	952	44.85	952	44.84	378	39.84	1487
										44.89	897	44.89	897	44.88	337	39.88	1534
										44.93	893	44.93	893	44.92	350	39.92	1501
										44.97	926	44.97	926	44.96	316	39.96	1505
										45.01	912	45.01	912	45	332	40	1453
										45.05	927	45.05	927	45.04	362	40.04	1464
										45.09	967	45.09	967	45.08	332	40.08	1378
										45.13	923	45.13	923	45.12	340	40.12	1490
										45.17	878	45.17	878	45.16	331	40.16	1479
										45.21	916	45.21	916	45.2	333	40.2	1450
										45.25	896	45.25	896	45.24	334	40.24	1413
										45.29	883	45.29	883	45.28	371	40.28	1400
										45.33	952	45.33	952	45.32	375	40.32	1380
										45.37	912	45.37	912	45.36	352	40.36	1384
										45.41	898	45.41	898	45.4	345	40.4	1397
										45.45	974	45.45	974	45.44	320	40.44	1405
										45.49	919	45.49	919	45.48	363	40.48	1405
										45.53	971	45.53	971	45.52	376	40.52	1399
										45.57	940	45.57	940	45.56	360	40.56	1463
										45.61	890	45.61	890	45.6	347	40.6	1432
										45.65	943	45.65	943	45.64	388	40.64	1357
										45.69	910	45.69	910	45.68	376	40.68	1383
										45.73	980	45.73	980	45.72	319	40.72	1318
										45.77	992	45.77	992	45.76	334	40.76	1419
										45.81	929	45.81	929	45.8	342	40.8	1341
										45.85	853	45.85	853	45.84	322	40.84	1449
										45.89	905	45.89	905	45.88	338	40.88	1418
										45.93	861	45.93	861	45.92	315	40.92	1416
										45.97	896	45.97	896	45.96	358	40.96	1371
										46.01	912	46.01	912	46	361	41	1414
										46.05	927	46.05	927	46.04	386	41.04	1354
										46.09	909	46.09	909	46.08	407	41.08	1323
										46.13	931	46.13	931	46.12	375	41.12	1328
										46.17	930	46.17	930	46.16	357	41.16	1369
										46.21	871	46.21	871	46.2	372	41.2	1350
										46.25	883	46.25	883	46.24	362	41.24	1341
										46.29	878	46.29	878	46.28	331	41.28	1385
										46.33	913	46.33	913	46.32	358	41.32	1321
										46.37	931	46.37	931	46.36	363	41.36	1327
										46.41	894	46.41	894	46.4	372	41.4	1358
										46.45	941	46.45	941	46.44	373	41.44	1355
										46.49	929	46.49	929	46.48	357	41.48	1382
										46.53	900	46.53	900	46.52	360	41.52	1335
										46.57	902	46.57	902	46.56	381	41.56	1370
										46.61	867	46.61	867	46.6	346	41.6	1340
										46.65	904	46.65	904	46.64	391	41.64	1367
										46.69	929	46.69	929	46.68	345	41.68	1393
										46.73	904	46.73	904	46.72	384	41.72	1367
										46.77	904	46.77	904	46.76	389	41.76	1370
										46.81	937	46.81	937	46.8	343	41.8	1301
										46.85	919	46.85	919	46.84	356	41.84	1319
										46.89	911	46.89	911	46.88	383	41.88	1307
										46.93	954	46.93	954	46.92	375	41.92	1404
										46.97	863	46.97	863	46.96	360	41.96	1374
										47.01	886	47.01	886	47	361	42	1300
										47.05	935	47.05	935	47.04	360	42.04	1359
										47.09	978	47.09	978	47.08	382	42.08	1396
										47.13	883	47.13	883	47.12	360	42.12	1373
										47.17	958	47.17	958	47.16	378	42.16	1379
										47.21	926	47.21	926	47.2	334	42.2	1439
										47.25	910	47.25	910	47.24	367	42.24	1263
										47.29	924	47.29	924	47.28	392	42.28	1316
										47.33	941	47.33	941	47.32	410	42.32	1397
										47.37	933	47.37	933	47.36	413	42.36	1395
										47.41	994	47.41	994	47.4	408	42.4	1350
										47.45	1014	47.45	1014	47.44	411	42.44	1361
										47.49	991	47.49	991	47.48	408	42.48	1310
										47.53	1053	47.53	1053	47.52	431	42.52	1354
										47.57	1112	47.57	1112	47.56	454	42.56	1278
										47.61	1092	47.61	1092	47.6	461	42.6	1385
										47.65	1143	47.65	1143	47.64	529	42.64	1331
										47.69	1259	47.69	1259	47.68	547	42.68	1381
										47.73	1357	47.73	1357	47.72	599	42.72	1393
										47.77	1513	47.77	1513	47.76	702	42.76	1337
										47.81	1763	47.81	1763	47.8	883	42.8	1348
										47.85	2024	47.85	2024	47.84	939	42.84	1262
										47.89	2231	47.89	2231	47.88	1172	42.88	1349
										47.93	2427	47.93	2427	47.92	1340	42.92	1364
										47.97	2545	47.97	2545	47.96	1495	42.96	1304
										48.01	2836	48.01	2836	48	1602	43	1423
										48.05	2894	48.05	2894	48.04	1711	43.04	1349
										48.09	2850	48.09	2850	48.08	1962	43.08	1384
										48.13	2784	48.13	2784	48.12	1987	43.12	1407
										48.17	2544	48.17	2544	48.16	2199	43.16	1322
										48.21	2327	48.21	2327	48.2	2250	43.2	1390
										48.25	2034	48.25	2034	48.24	2320	43.24	1341
										48.29	1730	48.29	1730	48.28	2347	43.28	1339
										48.33	1564	48.33	1564	48.32	2417	43.32	1348
										48.37	1238	48.37	1238	48.36	2364	43.36	1358
										48.41	1210	48.41	1210	48.4	2357	43.4	1353
										48.45	1115	48.45	1115	48.44	2196	43.44	1302
										48.49	1039	48.49	1039	48.48	2140	43.48	1379
										48.53	1032	48.53	1032	48.52	1927	43.52	1398
										48.57	1006	48.57	1006	48.56	1677	43.56	1354
										48.61	897	48.61	897	48.6	1631	43.6	1337
										48.65	986	48.65	986	48.64	1383	43.64	1374
										48.69	912	48.69	912	48.68	1101	43.68	1397
										48.73	908	48.73	908	48.72	998	43.72	1326
										48.77	861	48.77	861	48.76	888	43.76	1342
										48.81	857	48.81	857	48.8	751	43.8	1343
										48.85	909	48.85	909	48.84	688	43.84	1356
										48.89	898	48.89	898	48.88	559	43.88	1335
										48.93	854	48.93	854	48.92	506	43.92	1311
										48.97	885	48.97	885	48.96	445	43.96	1330
										49.01	908	49.01	908	49	424	44	1370
										49.05	878	49.05	878	49.04	420	44.04	1373
										49.09	858	49.09	858	49.08	415	44.08	1335
										49.13	907	49.13	907	49.12	381	44.12	1332
										49.17	864	49.17	864	49.16	375	44.16	1340
										49.21	819	49.21	819	49.2	354	44.2	1413
										49.25	850	49.25	850	49.24	349	44.24	1369
										49.29	846	49.29	846	49.28	397	44.28	1409
										49.33	833	49.33	833	49.32	341	44.32	1430
										49.37	862	49.37	862	49.36	356	44.36	1372
										49.41	839	49.41	839	49.4	325	44.4	1382
										49.45	845	49.45	845	49.44	314	44.44	1318
										49.49	832	49.49	832	49.48	348	44.48	1393
										49.53	816	49.53	816	49.52	338	44.52	1419
										49.57	869	49.57	869	49.56	377	44.56	1326
										49.61	826	49.61	826	49.6	346	44.6	1349
										49.65	830	49.65	830	49.64	320	44.64	1311
										49.69	840	49.69	840	49.68	341	44.68	1299
										49.73	834	49.73	834	49.72	324	44.72	1426
										49.77	826	49.77	826	49.76	329	44.76	1370
										49.81	840	49.81	840	49.8	357	44.8	1324
										49.85	872	49.85	872	49.84	325	44.84	1402
										49.89	807	49.89	807	49.88	337	44.88	1320
										49.93	833	49.93	833	49.92	306	44.92	1304
										49.97	796	49.97	796	49.96	292	44.96	1261
										50.01	847	50.01	847	50	334	45	1295
										50.05	832	50.05	832	50.04	367	45.04	1304
										50.09	876	50.09	876	50.08	307	45.08	1294
										50.13	804	50.13	804	50.12	294	45.12	1332
										50.17	835	50.17	835	50.16	340	45.16	1316
										50.21	789	50.21	789	50.2	323	45.2	1269
										50.25	795	50.25	795	50.24	306	45.24	1290
										50.29	827	50.29	827	50.28	310	45.28	1287
										50.33	807	50.33	807	50.32	304	45.32	1286
										50.37	893	50.37	893	50.36	327	45.36	1330
										50.41	850	50.41	850	50.4	294	45.4	1270
										50.45	784	50.45	784	50.44	321	45.44	1310
										50.49	830	50.49	830	50.48	342	45.48	1297
										50.53	824	50.53	824	50.52	310	45.52	1314
										50.57	806	50.57	806	50.56	337	45.56	1313
										50.61	819	50.61	819	50.6	271	45.6	1299
										50.65	840	50.65	840	50.64	320	45.64	1272
										50.69	833	50.69	833	50.68	331	45.68	1249
										50.73	863	50.73	863	50.72	278	45.72	1257
										50.77	842	50.77	842	50.76	292	45.76	1330
										50.81	822	50.81	822	50.8	331	45.8	1289
										50.85	789	50.85	789	50.84	272	45.84	1321
										50.89	835	50.89	835	50.88	312	45.88	1281
										50.93	824	50.93	824	50.92	290	45.92	1300
										50.97	815	50.97	815	50.96	272	45.96	1281
										51.01	807	51.01	807	51	300	46	1343
										51.05	805	51.05	805	51.04	287	46.04	1381
										51.09	755	51.09	755	51.08	319	46.08	1278
										51.13	781	51.13	781	51.12	304	46.12	1324
										51.17	819	51.17	819	51.16	301	46.16	1363
										51.21	821	51.21	821	51.2	327	46.2	1319
										51.25	808	51.25	808	51.24	293	46.24	1355
										51.29	819	51.29	819	51.28	294	46.28	1335
										51.33	870	51.33	870	51.32	291	46.32	1304
										51.37	817	51.37	817	51.36	296	46.36	1307
										51.41	763	51.41	763	51.4	297	46.4	1371
										51.45	790	51.45	790	51.44	311	46.44	1328
										51.49	863	51.49	863	51.48	296	46.48	1289
										51.53	825	51.53	825	51.52	279	46.52	1328
										51.57	787	51.57	787	51.56	292	46.56	1300
										51.61	818	51.61	818	51.6	310	46.6	1340
										51.65	816	51.65	816	51.64	298	46.64	1337
										51.69	810	51.69	810	51.68	286	46.68	1313
										51.73	817	51.73	817	51.72	302	46.72	1373
										51.77	824	51.77	824	51.76	306	46.76	1361
										51.81	782	51.81	782	51.8	311	46.8	1309
										51.85	782	51.85	782	51.84	267	46.84	1320
										51.89	854	51.89	854	51.88	312	46.88	1341
										51.93	793	51.93	793	51.92	317	46.92	1352
										51.97	793	51.97	793	51.96	291	46.96	1375
										52.01	792	52.01	792	52	304	47	1346
										52.05	775	52.05	775	52.04	282	47.04	1321
										52.09	819	52.09	819	52.08	272	47.08	1324
										52.13	855	52.13	855	52.12	293	47.12	1349
										52.17	802	52.17	802	52.16	314	47.16	1417
										52.21	832	52.21	832	52.2	269	47.2	1446
										52.25	777	52.25	777	52.24	289	47.24	1388
										52.29	787	52.29	787	52.28	310	47.28	1413
										52.33	817	52.33	817	52.32	286	47.32	1421
										52.37	788	52.37	788	52.36	275	47.36	1384
										52.41	851	52.41	851	52.4	287	47.4	1458
										52.45	798	52.45	798	52.44	318	47.44	1470
										52.49	820	52.49	820	52.48	309	47.48	1416
										52.53	850	52.53	850	52.52	323	47.52	1492
										52.57	827	52.57	827	52.56	312	47.56	1434
										52.61	895	52.61	895	52.6	291	47.6	1569
										52.65	804	52.65	804	52.64	307	47.64	1550
										52.69	783	52.69	783	52.68	289	47.68	1711
										52.73	780	52.73	780	52.72	293	47.72	1722
										52.77	818	52.77	818	52.76	297	47.76	1833
										52.81	773	52.81	773	52.8	330	47.8	1964
										52.85	860	52.85	860	52.84	320	47.84	2175
										52.89	837	52.89	837	52.88	318	47.88	2356
										52.93	850	52.93	850	52.92	295	47.92	2534
										52.97	795	52.97	795	52.96	321	47.96	2805
										53.01	835	53.01	835	53	301	48	3050
										53.05	803	53.05	803	53.04	306	48.04	3267
										53.09	880	53.09	880	53.08	307	48.08	3499
										53.13	857	53.13	857	53.12	329	48.12	3585
										53.17	832	53.17	832	53.16	299	48.16	4069
										53.21	798	53.21	798	53.2	323	48.2	4105
										53.25	830	53.25	830	53.24	297	48.24	4153
										53.29	825	53.29	825	53.28	312	48.28	4255
										53.33	837	53.33	837	53.32	295	48.32	4183
										53.37	847	53.37	847	53.36	319	48.36	4167
										53.41	814	53.41	814	53.4	308	48.4	4127
										53.45	839	53.45	839	53.44	326	48.44	3980
										53.49	802	53.49	802	53.48	311	48.48	3871
										53.53	852	53.53	852	53.52	307	48.52	3732
										53.57	863	53.57	863	53.56	325	48.56	3501
										53.61	857	53.61	857	53.6	351	48.6	3196
										53.65	806	53.65	806	53.64	271	48.64	3040
										53.69	847	53.69	847	53.68	294	48.68	2633
										53.73	893	53.73	893	53.72	298	48.72	2524
										53.77	865	53.77	865	53.76	291	48.76	2209
										53.81	883	53.81	883	53.8	338	48.8	2057
										53.85	884	53.85	884	53.84	331	48.84	1891
										53.89	948	53.89	948	53.88	320	48.88	1675
										53.93	873	53.93	873	53.92	294	48.92	1606
										53.97	897	53.97	897	53.96	336	48.96	1554
										54.01	959	54.01	959	54	341	49	1564
										54.05	945	54.05	945	54.04	325	49.04	1463
										54.09	1029	54.09	1029	54.08	336	49.08	1439
										54.13	927	54.13	927	54.12	330	49.12	1346
										54.17	956	54.17	956	54.16	328	49.16	1361
										54.21	1037	54.21	1037	54.2	359	49.2	1312
										54.25	1004	54.25	1004	54.24	322	49.24	1346
										54.29	1050	54.29	1050	54.28	350	49.28	1272
										54.33	968	54.33	968	54.32	329	49.32	1342
										54.37	1041	54.37	1041	54.36	356	49.36	1302
										54.41	1023	54.41	1023	54.4	353	49.4	1310
										54.45	1110	54.45	1110	54.44	368	49.44	1268
										54.49	1087	54.49	1087	54.48	389	49.48	1240
										54.53	1102	54.53	1102	54.52	416	49.52	1280
										54.57	1126	54.57	1126	54.56	397	49.56	1260
										54.61	1142	54.61	1142	54.6	412	49.6	1277
										54.65	1177	54.65	1177	54.64	437	49.64	1305
										54.69	1243	54.69	1243	54.68	446	49.68	1224
										54.73	1353	54.73	1353	54.72	516	49.72	1224
										54.77	1480	54.77	1480	54.76	567	49.76	1269
										54.81	1619	54.81	1619	54.8	601	49.8	1203
										54.85	1759	54.85	1759	54.84	702	49.84	1204
										54.89	2018	54.89	2018	54.88	733	49.88	1204
										54.93	2169	54.93	2169	54.92	820	49.92	1344
										54.97	2255	54.97	2255	54.96	915	49.96	1171
										55.01	2370	55.01	2370	55	983	50	1201
										55.05	2422	55.05	2422	55.04	1104	50.04	1294
										55.09	2518	55.09	2518	55.08	1140	50.08	1170
										55.13	2412	55.13	2412	55.12	1261	50.12	1259
										55.17	2341	55.17	2341	55.16	1322	50.16	1228
										55.21	2227	55.21	2227	55.2	1355	50.2	1133
										55.25	1994	55.25	1994	55.24	1395	50.24	1145
										55.29	1802	55.29	1802	55.28	1420	50.28	1192
										55.33	1657	55.33	1657	55.32	1453	50.32	1218
										55.37	1464	55.37	1464	55.36	1431	50.36	1209
										55.41	1285	55.41	1285	55.4	1457	50.4	1146
										55.45	1185	55.45	1185	55.44	1472	50.44	1148
										55.49	1057	55.49	1057	55.48	1356	50.48	1177
										55.53	1006	55.53	1006	55.52	1292	50.52	1189
										55.57	945	55.57	945	55.56	1324	50.56	1177
										55.61	982	55.61	982	55.6	1221	50.6	1170
										55.65	957	55.65	957	55.64	1081	50.64	1175
										55.69	933	55.69	933	55.68	951	50.68	1279
										55.73	923	55.73	923	55.72	883	50.72	1148
										55.77	959	55.77	959	55.76	789	50.76	1218
										55.81	847	55.81	847	55.8	711	50.8	1126
										55.85	872	55.85	872	55.84	647	50.84	1175
										55.89	919	55.89	919	55.88	562	50.88	1189
										55.93	920	55.93	920	55.92	495	50.92	1120
										55.97	875	55.97	875	55.96	478	50.96	1124
										56.01	823	56.01	823	56	423	51	1137
										56.05	888	56.05	888	56.04	426	51.04	1149
										56.09	884	56.09	884	56.08	387	51.08	1158
										56.13	863	56.13	863	56.12	381	51.12	1120
										56.17	874	56.17	874	56.16	348	51.16	1151
										56.21	878	56.21	878	56.2	354	51.2	1203
										56.25	833	56.25	833	56.24	315	51.24	1100
										56.29	851	56.29	851	56.28	342	51.28	1166
										56.33	831	56.33	831	56.32	314	51.32	1180
										56.37	859	56.37	859	56.36	327	51.36	1179
										56.41	854	56.41	854	56.4	314	51.4	1158
										56.45	842	56.45	842	56.44	324	51.44	1126
										56.49	854	56.49	854	56.48	310	51.48	1185
										56.53	806	56.53	806	56.52	291	51.52	1119
										56.57	823	56.57	823	56.56	308	51.56	1090
										56.61	777	56.61	777	56.6	323	51.6	1161
										56.65	827	56.65	827	56.64	325	51.64	1114
										56.69	866	56.69	866	56.68	314	51.68	1068
										56.73	821	56.73	821	56.72	301	51.72	1189
										56.77	817	56.77	817	56.76	319	51.76	1148
										56.81	913	56.81	913	56.8	277	51.8	1130
										56.85	860	56.85	860	56.84	291	51.84	1149
										56.89	840	56.89	840	56.88	287	51.88	1109
										56.93	835	56.93	835	56.92	296	51.92	1140
										56.97	821	56.97	821	56.96	285	51.96	1109
										57.01	801	57.01	801	57	316	52	1158
										57.05	827	57.05	827	57.04	289	52.04	1121
										57.09	812	57.09	812	57.08	322	52.08	1141
										57.13	828	57.13	828	57.12	289	52.12	1138
										57.17	851	57.17	851	57.16	297	52.16	1166
										57.21	855	57.21	855	57.2	312	52.2	1168
										57.25	840	57.25	840	57.24	279	52.24	1107
										57.29	819	57.29	819	57.28	298	52.28	1183
										57.33	827	57.33	827	57.32	274	52.32	1174
										57.37	792	57.37	792	57.36	325	52.36	1097
										57.41	889	57.41	889	57.4	300	52.4	1207
										57.45	793	57.45	793	57.44	296	52.44	1102
										57.49	783	57.49	783	57.48	301	52.48	1182
										57.53	832	57.53	832	57.52	280	52.52	1204
										57.57	780	57.57	780	57.56	284	52.56	1164
										57.61	832	57.61	832	57.6	286	52.6	1137
										57.65	800	57.65	800	57.64	295	52.64	1115
										57.69	814	57.69	814	57.68	272	52.68	1171
										57.73	817	57.73	817	57.72	308	52.72	1173
										57.77	838	57.77	838	57.76	308	52.76	1104
										57.81	856	57.81	856	57.8	272	52.8	1176
										57.85	762	57.85	762	57.84	289	52.84	1223
										57.89	799	57.89	799	57.88	296	52.88	1186
										57.93	819	57.93	819	57.92	293	52.92	1198
										57.97	803	57.97	803	57.96	297	52.96	1202
										58.01	824	58.01	824	58	300	53	1188
										58.05	814	58.05	814	58.04	289	53.04	1192
										58.09	806	58.09	806	58.08	269	53.08	1208
										58.13	842	58.13	842	58.12	266	53.12	1240
										58.17	826	58.17	826	58.16	273	53.16	1231
										58.21	832	58.21	832	58.2	271	53.2	1193
										58.25	800	58.25	800	58.24	259	53.24	1207
										58.29	840	58.29	840	58.28	278	53.28	1192
										58.33	751	58.33	751	58.32	331	53.32	1197
										58.37	831	58.37	831	58.36	254	53.36	1242
										58.41	817	58.41	817	58.4	283	53.4	1190
										58.45	776	58.45	776	58.44	284	53.44	1217
										58.49	781	58.49	781	58.48	279	53.48	1212
										58.53	784	58.53	784	58.52	282	53.52	1218
										58.57	832	58.57	832	58.56	277	53.56	1291
										58.61	809	58.61	809	58.6	273	53.6	1229
										58.65	806	58.65	806	58.64	290	53.64	1222
										58.69	832	58.69	832	58.68	285	53.68	1256
										58.73	756	58.73	756	58.72	292	53.72	1277
										58.77	773	58.77	773	58.76	289	53.76	1213
										58.81	742	58.81	742	58.8	293	53.8	1260
										58.85	765	58.85	765	58.84	272	53.84	1314
										58.89	805	58.89	805	58.88	265	53.88	1358
										58.93	827	58.93	827	58.92	281	53.92	1365
										58.97	814	58.97	814	58.96	282	53.96	1365
										59.01	810	59.01	810	59	319	54	1311
										59.05	803	59.05	803	59.04	289	54.04	1317
										59.09	826	59.09	826	59.08	254	54.08	1383
										59.13	775	59.13	775	59.12	269	54.12	1453
										59.17	796	59.17	796	59.16	277	54.16	1439
										59.21	822	59.21	822	59.2	299	54.2	1509
										59.25	781	59.25	781	59.24	288	54.24	1545
										59.29	792	59.29	792	59.28	287	54.28	1497
										59.33	801	59.33	801	59.32	275	54.32	1493
										59.37	794	59.37	794	59.36	282	54.36	1546
										59.41	752	59.41	752	59.4	274	54.4	1588
										59.45	775	59.45	775	59.44	271	54.44	1609
										59.49	833	59.49	833	59.48	292	54.48	1628
										59.53	830	59.53	830	59.52	315	54.52	1665
										59.57	801	59.57	801	59.56	314	54.56	1707
										59.61	839	59.61	839	59.6	320	54.6	1764
										59.65	800	59.65	800	59.64	250	54.64	1820
										59.69	782	59.69	782	59.68	268	54.68	1866
										59.73	801	59.73	801	59.72	260	54.72	1903
										59.77	832	59.77	832	59.76	278	54.76	1979
										59.81	827	59.81	827	59.8	302	54.8	2065
										59.85	820	59.85	820	59.84	336	54.84	2119
										59.89	775	59.89	775	59.88	305	54.88	2266
										59.93	773	59.93	773	59.92	274	54.92	2369
										59.97	830	59.97	830	59.96	304	54.96	2476
										60.01	805	60.01	805	60	284	55	2654
										60.05	860	60.05	860	60.04	345	55.04	2818
										60.09	787	60.09	787	60.08	284	55.08	2900
										60.13	764	60.13	764	60.12	272	55.12	3091
										60.17	818	60.17	818	60.16	292	55.16	3155
										60.21	814	60.21	814	60.2	313	55.2	3243
										60.25	826	60.25	826	60.24	308	55.24	3329
										60.29	758	60.29	758	60.28	286	55.28	3392
										60.33	809	60.33	809	60.32	295	55.32	3507
										60.37	767	60.37	767	60.36	275	55.36	3453
										60.41	768	60.41	768	60.4	288	55.4	3477
										60.45	800	60.45	800	60.44	302	55.44	3337
										60.49	810	60.49	810	60.48	278	55.48	3241
										60.53	786	60.53	786	60.52	297	55.52	3126
										60.57	814	60.57	814	60.56	302	55.56	3018
										60.61	830	60.61	830	60.6	292	55.6	2946
										60.65	775	60.65	775	60.64	271	55.64	2677
										60.69	824	60.69	824	60.68	318	55.68	2653
										60.73	777	60.73	777	60.72	263	55.72	2368
										60.77	798	60.77	798	60.76	298	55.76	2240
										60.81	800	60.81	800	60.8	301	55.8	2091
										60.85	851	60.85	851	60.84	290	55.84	2059
										60.89	827	60.89	827	60.88	285	55.88	1910
										60.93	860	60.93	860	60.92	282	55.92	1654
										60.97	753	60.97	753	60.96	291	55.96	1612
										61.01	774	61.01	774	61	291	56	1514
										61.05	868	61.05	868	61.04	282	56.04	1481
										61.09	830	61.09	830	61.08	316	56.08	1449
										61.13	763	61.13	763	61.12	304	56.12	1371
										61.17	801	61.17	801	61.16	291	56.16	1363
										61.21	811	61.21	811	61.2	320	56.2	1346
										61.25	828	61.25	828	61.24	286	56.24	1320
										61.29	802	61.29	802	61.28	281	56.28	1373
										61.33	771	61.33	771	61.32	288	56.32	1411
										61.37	826	61.37	826	61.36	293	56.36	1321
										61.41	828	61.41	828	61.4	296	56.4	1322
										61.45	817	61.45	817	61.44	293	56.44	1283
										61.49	849	61.49	849	61.48	290	56.48	1303
										61.53	796	61.53	796	61.52	301	56.52	1282
										61.57	801	61.57	801	61.56	299	56.56	1278
										61.61	816	61.61	816	61.6	307	56.6	1228
										61.65	814	61.65	814	61.64	299	56.64	1306
										61.69	809	61.69	809	61.68	317	56.68	1217
										61.73	795	61.73	795	61.72	328	56.72	1265
										61.77	839	61.77	839	61.76	300	56.76	1256
										61.81	879	61.81	879	61.8	305	56.8	1284
										61.85	869	61.85	869	61.84	317	56.84	1269
										61.89	926	61.89	926	61.88	335	56.88	1287
										61.93	933	61.93	933	61.92	360	56.92	1292
										61.97	974	61.97	974	61.96	355	56.96	1247
										62.01	945	62.01	945	62	391	57	1233
										62.05	992	62.05	992	62.04	375	57.04	1271
										62.09	977	62.09	977	62.08	401	57.08	1170
										62.13	996	62.13	996	62.12	409	57.12	1189
										62.17	998	62.17	998	62.16	392	57.16	1179
										62.21	1039	62.21	1039	62.2	433	57.2	1197
										62.25	1041	62.25	1041	62.24	471	57.24	1296
										62.29	970	62.29	970	62.28	482	57.28	1230
										62.33	998	62.33	998	62.32	493	57.32	1168
										62.37	1010	62.37	1010	62.36	447	57.36	1189
										62.41	983	62.41	983	62.4	511	57.4	1166
										62.45	1080	62.45	1080	62.44	559	57.44	1240
										62.49	979	62.49	979	62.48	531	57.48	1145
										62.53	1053	62.53	1053	62.52	602	57.52	1199
										62.57	1067	62.57	1067	62.56	589	57.56	1202
										62.61	1115	62.61	1115	62.6	607	57.6	1173
										62.65	1103	62.65	1103	62.64	681	57.64	1136
										62.69	1078	62.69	1078	62.68	659	57.68	1133
										62.73	1164	62.73	1164	62.72	663	57.72	1133
										62.77	1126	62.77	1126	62.76	682	57.76	1127
										62.81	1180	62.81	1180	62.8	728	57.8	1152
										62.85	1084	62.85	1084	62.84	737	57.84	1132
										62.89	1026	62.89	1026	62.88	725	57.88	1131
										62.93	1028	62.93	1028	62.92	755	57.92	1079
										62.97	1050	62.97	1050	62.96	751	57.96	1111
										63.01	990	63.01	990	63	760	58	1150
										63.05	984	63.05	984	63.04	695	58.04	1104
										63.09	935	63.09	935	63.08	749	58.08	1138
										63.13	897	63.13	897	63.12	723	58.12	1152
										63.17	951	63.17	951	63.16	725	58.16	1079
										63.21	893	63.21	893	63.2	645	58.2	1095
										63.25	886	63.25	886	63.24	611	58.24	1116
										63.29	924	63.29	924	63.28	640	58.28	1067
										63.33	881	63.33	881	63.32	602	58.32	1135
										63.37	901	63.37	901	63.36	497	58.36	1106
										63.41	824	63.41	824	63.4	516	58.4	1122
										63.45	780	63.45	780	63.44	531	58.44	1110
										63.49	816	63.49	816	63.48	488	58.48	1014
										63.53	886	63.53	886	63.52	398	58.52	1090
										63.57	865	63.57	865	63.56	381	58.56	1101
										63.61	867	63.61	867	63.6	369	58.6	1119
										63.65	798	63.65	798	63.64	360	58.64	1072
										63.69	844	63.69	844	63.68	350	58.68	1127
										63.73	822	63.73	822	63.72	383	58.72	1132
										63.77	850	63.77	850	63.76	342	58.76	1138
										63.81	841	63.81	841	63.8	366	58.8	1004
										63.85	824	63.85	824	63.84	328	58.84	1104
										63.89	785	63.89	785	63.88	367	58.88	1098
										63.93	847	63.93	847	63.92	322	58.92	1063
										63.97	881	63.97	881	63.96	283	58.96	1069
										64.01	817	64.01	817	64	296	59	1112
										64.05	784	64.05	784	64.04	287	59.04	1126
										64.09	824	64.09	824	64.08	307	59.08	1106
										64.13	850	64.13	850	64.12	292	59.12	1119
										64.17	829	64.17	829	64.16	296	59.16	1090
										64.21	847	64.21	847	64.2	305	59.2	1055
										64.25	806	64.25	806	64.24	241	59.24	1117
										64.29	814	64.29	814	64.28	264	59.28	1130
										64.33	794	64.33	794	64.32	284	59.32	1082
										64.37	822	64.37	822	64.36	290	59.36	1090
										64.41	805	64.41	805	64.4	277	59.4	1112
										64.45	840	64.45	840	64.44	286	59.44	1075
										64.49	781	64.49	781	64.48	282	59.48	1064
										64.53	784	64.53	784	64.52	273	59.52	1074
										64.57	808	64.57	808	64.56	272	59.56	1065
										64.61	812	64.61	812	64.6	290	59.6	1092
										64.65	803	64.65	803	64.64	297	59.64	1035
										64.69	741	64.69	741	64.68	262	59.68	1079
										64.73	778	64.73	778	64.72	300	59.72	1051
										64.77	815	64.77	815	64.76	301	59.76	1097
										64.81	811	64.81	811	64.8	297	59.8	1130
										64.85	821	64.85	821	64.84	307	59.84	1074
										64.89	793	64.89	793	64.88	281	59.88	1068
										64.93	796	64.93	796	64.92	300	59.92	1128
										64.97	786	64.97	786	64.96	278	59.96	1085
										65.01	782	65.01	782	65	253	60	1108
										65.05	738	65.05	738	65.04	245	60.04	1189
										65.09	798	65.09	798	65.08	291	60.08	1086
										65.13	792	65.13	792	65.12	267	60.12	1073
										65.17	835	65.17	835	65.16	271	60.16	1092
										65.21	733	65.21	733	65.2	288	60.2	1100
										65.25	798	65.25	798	65.24	275	60.24	1067
										65.29	785	65.29	785	65.28	247	60.28	1064
										65.33	748	65.33	748	65.32	242	60.32	1061
										65.37	773	65.37	773	65.36	265	60.36	1084
										65.41	808	65.41	808	65.4	275	60.4	1095
										65.45	730	65.45	730	65.44	264	60.44	1115
										65.49	749	65.49	749	65.48	260	60.48	1121
										65.53	756	65.53	756	65.52	278	60.52	1175
										65.57	775	65.57	775	65.56	268	60.56	1116
										65.61	780	65.61	780	65.6	256	60.6	1053
										65.65	730	65.65	730	65.64	255	60.64	1107
										65.69	757	65.69	757	65.68	286	60.68	1123
										65.73	732	65.73	732	65.72	266	60.72	1045
										65.77	748	65.77	748	65.76	248	60.76	1100
										65.81	742	65.81	742	65.8	288	60.8	1120
										65.85	762	65.85	762	65.84	259	60.84	1076
										65.89	748	65.89	748	65.88	269	60.88	1073
										65.93	720	65.93	720	65.92	285	60.92	1121
										65.97	787	65.97	787	65.96	291	60.96	1062
										66.01	814	66.01	814	66	260	61	1146
										66.05	780	66.05	780	66.04	272	61.04	1093
										66.09	730	66.09	730	66.08	259	61.08	1060
										66.13	740	66.13	740	66.12	255	61.12	1138
										66.17	765	66.17	765	66.16	258	61.16	1082
										66.21	738	66.21	738	66.2	258	61.2	1105
										66.25	725	66.25	725	66.24	279	61.24	1120
										66.29	729	66.29	729	66.28	274	61.28	1122
										66.33	744	66.33	744	66.32	255	61.32	1086
										66.37	779	66.37	779	66.36	255	61.36	1135
										66.41	732	66.41	732	66.4	251	61.4	1102
										66.45	723	66.45	723	66.44	233	61.44	1109
										66.49	739	66.49	739	66.48	259	61.48	1025
										66.53	744	66.53	744	66.52	273	61.52	1128
										66.57	748	66.57	748	66.56	246	61.56	1053
										66.61	734	66.61	734	66.6	268	61.6	1128
										66.65	752	66.65	752	66.64	263	61.64	1105
										66.69	706	66.69	706	66.68	245	61.68	1118
										66.73	716	66.73	716	66.72	238	61.72	1081
										66.77	745	66.77	745	66.76	242	61.76	1162
										66.81	806	66.81	806	66.8	260	61.8	1176
										66.85	718	66.85	718	66.84	295	61.84	1158
										66.89	743	66.89	743	66.88	276	61.88	1139
										66.93	736	66.93	736	66.92	257	61.92	1157
										66.97	662	66.97	662	66.96	231	61.96	1198
										67.01	721	67.01	721	67	272	62	1198
										67.05	760	67.05	760	67.04	244	62.04	1199
										67.09	726	67.09	726	67.08	253	62.08	1301
										67.13	761	67.13	761	67.12	236	62.12	1297
										67.17	731	67.17	731	67.16	251	62.16	1317
										67.21	726	67.21	726	67.2	264	62.2	1299
										67.25	720	67.25	720	67.24	225	62.24	1372
										67.29	696	67.29	696	67.28	246	62.28	1431
										67.33	748	67.33	748	67.32	265	62.32	1396
										67.37	749	67.37	749	67.36	260	62.36	1415
										67.41	750	67.41	750	67.4	279	62.4	1465
										67.45	727	67.45	727	67.44	269	62.44	1545
										67.49	710	67.49	710	67.48	224	62.48	1524
										67.53	696	67.53	696	67.52	264	62.52	1543
										67.57	742	67.57	742	67.56	234	62.56	1573
										67.61	683	67.61	683	67.6	259	62.6	1617
										67.65	693	67.65	693	67.64	255	62.64	1694
										67.69	660	67.69	660	67.68	262	62.68	1640
										67.73	729	67.73	729	67.72	246	62.72	1746
										67.77	728	67.77	728	67.76	239	62.76	1752
										67.81	712	67.81	712	67.8	233	62.8	1743
										67.85	747	67.85	747	67.84	246	62.84	1778
										67.89	697	67.89	697	67.88	289	62.88	1760
										67.93	735	67.93	735	67.92	227	62.92	1820
										67.97	721	67.97	721	67.96	252	62.96	1835
										68.01	736	68.01	736	68	251	63	1875
										68.05	745	68.05	745	68.04	266	63.04	1791
										68.09	712	68.09	712	68.08	240	63.08	1711
										68.13	747	68.13	747	68.12	278	63.12	1749
										68.17	727	68.17	727	68.16	236	63.16	1768
										68.21	711	68.21	711	68.2	266	63.2	1731
										68.25	786	68.25	786	68.24	272	63.24	1687
										68.29	675	68.29	675	68.28	246	63.28	1604
										68.33	731	68.33	731	68.32	257	63.32	1513
										68.37	705	68.37	705	68.36	247	63.36	1636
										68.41	764	68.41	764	68.4	257	63.4	1652
										68.45	703	68.45	703	68.44	261	63.44	1551
										68.49	709	68.49	709	68.48	250	63.48	1515
										68.53	675	68.53	675	68.52	257	63.52	1435
										68.57	729	68.57	729	68.56	246	63.56	1423
										68.61	805	68.61	805	68.6	239	63.6	1332
										68.65	717	68.65	717	68.64	266	63.64	1339
										68.69	763	68.69	763	68.68	259	63.68	1287
										68.73	738	68.73	738	68.72	267	63.72	1323
										68.77	696	68.77	696	68.76	273	63.76	1307
										68.81	777	68.81	777	68.8	247	63.8	1247
										68.85	779	68.85	779	68.84	265	63.84	1262
										68.89	790	68.89	790	68.88	275	63.88	1228
										68.93	771	68.93	771	68.92	261	63.92	1148
										68.97	750	68.97	750	68.96	281	63.96	1228
										69.01	733	69.01	733	69	281	64	1220
										69.05	753	69.05	753	69.04	276	64.04	1182
										69.09	661	69.09	661	69.08	250	64.08	1122
										69.13	728	69.13	728	69.12	278	64.12	1161
										69.17	672	69.17	672	69.16	279	64.16	1126
										69.21	753	69.21	753	69.2	282	64.2	1184
										69.25	770	69.25	770	69.24	255	64.24	1187
										69.29	748	69.29	748	69.28	259	64.28	1185
										69.33	757	69.33	757	69.32	256	64.32	1167
										69.37	750	69.37	750	69.36	256	64.36	1203
										69.41	745	69.41	745	69.4	260	64.4	1105
										69.45	731	69.45	731	69.44	306	64.44	1124
										69.49	718	69.49	718	69.48	250	64.48	1134
										69.53	742	69.53	742	69.52	272	64.52	1101
										69.57	750	69.57	750	69.56	277	64.56	1141
										69.61	729	69.61	729	69.6	264	64.6	1149
										69.65	783	69.65	783	69.64	277	64.64	1084
										69.69	751	69.69	751	69.68	268	64.68	1124
										69.73	826	69.73	826	69.72	292	64.72	1106
										69.77	748	69.77	748	69.76	284	64.76	1071
										69.81	725	69.81	725	69.8	295	64.8	1118
										69.85	727	69.85	727	69.84	277	64.84	1077
										69.89	821	69.89	821	69.88	294	64.88	1102
										69.93	720	69.93	720	69.92	300	64.92	1123
										69.97	746	69.97	746	69.96	328	64.96	1078
										70	836	70	836	70	305	65	1092
														70.04	307	65.04	1122
														70.08	346	65.08	1077
														70.12	381	65.12	1096
														70.16	382	65.16	1071
														70.2	389	65.2	1099
														70.24	418	65.24	1023
														70.28	381	65.28	1084
														70.32	383	65.32	1043
														70.36	451	65.36	1028
														70.4	494	65.4	1006
														70.44	447	65.44	1041
														70.48	416	65.48	1090
														70.52	486	65.52	987
														70.56	479	65.56	1025
														70.6	484	65.6	1019
														70.64	498	65.64	1083
														70.68	492	65.68	1040
														70.72	489	65.72	984
														70.76	451	65.76	990
														70.8	454	65.8	1014
														70.84	474	65.84	1025
														70.88	387	65.88	1021
														70.92	401	65.92	983
														70.96	374	65.96	1011
														71	404	66	1009
														71.04	341	66.04	1014
														71.08	316	66.08	1030
														71.12	340	66.12	974
														71.16	288	66.16	997
														71.2	295	66.2	965
														71.24	302	66.24	956
														71.28	274	66.28	964
														71.32	248	66.32	983
														71.36	240	66.36	989
														71.4	227	66.4	1002
														71.44	252	66.44	968
														71.48	217	66.48	985
														71.52	233	66.52	1036
														71.56	238	66.56	1002
														71.6	248	66.6	978
														71.64	228	66.64	933
														71.68	250	66.68	913
														71.72	209	66.72	951
														71.76	250	66.76	966
														71.8	201	66.8	914
														71.84	213	66.84	966
														71.88	228	66.88	925
														71.92	196	66.92	968
														71.96	226	66.96	964
														72	226	67	997
														72.04	252	67.04	965
														72.08	235	67.08	927
														72.12	244	67.12	966
														72.16	247	67.16	906
														72.2	222	67.2	936
														72.24	251	67.24	934
														72.28	233	67.28	918
														72.32	207	67.32	928
														72.36	227	67.36	951
														72.4	240	67.4	976
														72.44	232	67.44	971
														72.48	217	67.48	1018
														72.52	225	67.52	941
														72.56	228	67.56	957
														72.6	227	67.6	959
														72.64	221	67.64	963
														72.68	216	67.68	975
														72.72	219	67.72	921
														72.76	216	67.76	940
														72.8	224	67.8	902
														72.84	211	67.84	950
														72.88	221	67.88	919
														72.92	250	67.92	946
														72.96	239	67.96	881
														73	221	68	917
														73.04	219	68.04	931
														73.08	209	68.08	943
														73.12	228	68.12	987
														73.16	233	68.16	962
														73.2	225	68.2	947
														73.24	214	68.24	923
														73.28	218	68.28	927
														73.32	181	68.32	940
														73.36	212	68.36	943
														73.4	252	68.4	937
														73.44	238	68.44	1007
														73.48	218	68.48	980
														73.52	246	68.52	957
														73.56	228	68.56	981
														73.6	233	68.6	960
														73.64	217	68.64	930
														73.68	214	68.68	1018
														73.72	224	68.72	968
														73.76	221	68.76	1042
														73.8	229	68.8	952
														73.84	223	68.84	1024
														73.88	216	68.88	1021
														73.92	227	68.92	1006
														73.96	248	68.96	1059
														74	225	69	1041
														74.04	199	69.04	1088
														74.08	211	69.08	1048
														74.12	213	69.12	1082
														74.16	230	69.16	1044
														74.2	198	69.2	1084
														74.24	213	69.24	1039
														74.28	193	69.28	1088
														74.32	216	69.32	1048
														74.36	235	69.36	1071
														74.4	220	69.4	1065
														74.44	248	69.44	1069
														74.48	226	69.48	1106
														74.52	252	69.52	1080
														74.56	280	69.56	1127
														74.6	268	69.6	1028
														74.64	257	69.64	1034
														74.68	255	69.68	1018
														74.72	267	69.72	1099
														74.76	305	69.76	1021
														74.8	315	69.8	1048
														74.84	309	69.84	1015
														74.88	316	69.88	1089
														74.92	343	69.92	1081
														74.96	389	69.96	1044
														75	394	70	1007
														75.04	383	70.04	1077
														75.08	404	70.08	1097
														75.12	449	70.12	1110
														75.16	430	70.16	1134
														75.2	462	70.2	1115
														75.24	453	70.24	1144
														75.28	452	70.28	1129
														75.32	496	70.32	1089
														75.36	481	70.36	1184
														75.4	469	70.4	1173
														75.44	495	70.44	1234
														75.48	510	70.48	1236
														75.52	472	70.52	1198
														75.56	459	70.56	1194
														75.6	471	70.6	1248
														75.64	473	70.64	1178
														75.68	396	70.68	1204
														75.72	442	70.72	1171
														75.76	396	70.76	1164
														75.8	413	70.8	1119
														75.84	350	70.84	1086
														75.88	391	70.88	1102
														75.92	357	70.92	1120
														75.96	383	70.96	1032
														76	326	71	1043
														76.04	377	71.04	1069
														76.08	322	71.08	992
														76.12	344	71.12	973
														76.16	305	71.16	957
														76.2	284	71.2	970
														76.24	314	71.24	901
														76.28	311	71.28	924
														76.32	303	71.32	908
														76.36	316	71.36	915
														76.4	318	71.4	824
														76.44	312	71.44	827
														76.48	284	71.48	908
														76.52	282	71.52	797
														76.56	298	71.56	905
														76.6	280	71.6	820
														76.64	262	71.64	856
														76.68	256	71.68	874
														76.72	268	71.72	835
														76.76	252	71.76	842
														76.8	257	71.8	901
														76.84	270	71.84	850
														76.88	213	71.88	807
														76.92	247	71.92	822
														76.96	240	71.96	855
														77	217	72	848
														77.04	212	72.04	825
														77.08	212	72.08	813
														77.12	208	72.12	790
														77.16	199	72.16	809
														77.2	213	72.2	809
														77.24	204	72.24	808
														77.28	195	72.28	824
														77.32	214	72.32	831
														77.36	177	72.36	881
														77.4	223	72.4	835
														77.44	231	72.44	842
														77.48	220	72.48	757
														77.52	181	72.52	824
														77.56	202	72.56	805
														77.6	207	72.6	800
														77.64	186	72.64	806
														77.68	205	72.68	843
														77.72	200	72.72	815
														77.76	199	72.76	775
														77.8	157	72.8	828
														77.84	194	72.84	793
														77.88	197	72.88	850
														77.92	194	72.92	802
														77.96	188	72.96	785
														78	194	73	814
														78.04	166	73.04	801
														78.08	193	73.08	762
														78.12	191	73.12	769
														78.16	189	73.16	814
														78.2	181	73.2	799
														78.24	188	73.24	776
														78.28	208	73.28	822
														78.32	193	73.32	794
														78.36	192	73.36	843
														78.4	177	73.4	757
														78.44	200	73.44	771
														78.48	196	73.48	779
														78.52	179	73.52	794
														78.56	186	73.56	796
														78.6	166	73.6	773
														78.64	179	73.64	781
														78.68	199	73.68	788
														78.72	194	73.72	864
														78.76	178	73.76	847
														78.8	171	73.8	803
														78.84	217	73.84	757
														78.88	179	73.88	819
														78.92	155	73.92	762
														78.96	170	73.96	821
														79	204	74	792
														79.04	218	74.04	784
														79.08	185	74.08	810
														79.12	198	74.12	855
														79.16	181	74.16	771
														79.2	194	74.2	802
														79.24	219	74.24	841
														79.28	190	74.28	748
														79.32	199	74.32	853
														79.36	191	74.36	796
														79.4	192	74.4	784
														79.44	188	74.44	787
														79.48	189	74.48	832
														79.52	196	74.52	790
														79.56	176	74.56	824
														79.6	185	74.6	833
														79.64	190	74.64	812
														79.68	201	74.68	847
														79.72	206	74.72	909
														79.76	190	74.76	837
														79.8	213	74.8	902
														79.84	176	74.84	955
														79.88	173	74.88	909
														79.92	170	74.92	974
														79.96	186	74.96	978
														80	185	75	991
																75.04	1112
																75.08	1133
																75.12	1135
																75.16	1223
																75.2	1213
																75.24	1183
																75.28	1201
																75.32	1277
																75.36	1242
																75.4	1194
																75.44	1293
																75.48	1245
																75.52	1265
																75.56	1279
																75.6	1217
																75.64	1200
																75.68	1193
																75.72	1227
																75.76	1129
																75.8	1087
																75.84	1136
																75.88	1136
																75.92	1139
																75.96	1089
																76	1099
																76.04	1085
																76.08	1094
																76.12	1009
																76.16	1054
																76.2	1055
																76.24	1088
																76.28	1043
																76.32	971
																76.36	1028
																76.4	1086
																76.44	989
																76.48	1004
																76.52	950
																76.56	1007
																76.6	934
																76.64	935
																76.68	976
																76.72	958
																76.76	918
																76.8	876
																76.84	839
																76.88	917
																76.92	819
																76.96	852
																77	823
																77.04	799
																77.08	828
																77.12	748
																77.16	781
																77.2	784
																77.24	812
																77.28	782
																77.32	745
																77.36	764
																77.4	682
																77.44	730
																77.48	738
																77.52	803
																77.56	727
																77.6	738
																77.64	733
																77.68	730
																77.72	746
																77.76	679
																77.8	718
																77.84	720
																77.88	709
																77.92	714
																77.96	705
																78	742
																78.04	698
																78.08	753
																78.12	725
																78.16	680
																78.2	683
																78.24	769
																78.28	674
																78.32	689
																78.36	691
																78.4	702
																78.44	732
																78.48	714
																78.52	719
																78.56	680
																78.6	660
																78.64	708
																78.68	717
																78.72	693
																78.76	706
																78.8	688
																78.84	705
																78.88	691
																78.92	734
																78.96	694
																79	703
																79.04	657
																79.08	688
																79.12	684
																79.16	753
																79.2	673
																79.24	661
																79.28	704
																79.32	577
																79.36	662
																79.4	709
																79.44	704
																79.48	688
																79.52	678
																79.56	690
																79.6	674
																79.64	646
																79.68	664
																79.72	654
																79.76	686
																79.8	645
																79.84	624
																79.88	633
																79.92	632
																79.96	679
																80	673

## Sheet: WDX
Data Below is WDX, for thin films made with AACVD of TTIP and TDMAT. Labelled by fraction of TDMAT in the precursor
Values in Atom %
	WDX				EDX
	N k	O k	Ti L		C K	N K	O K	Na K	Mg K	Al K	Si K	K K	Ca K	Ti L
50% TDMAT	8.8	71.3	19.9		6.3	9.5	47.1	2.3	0.6	0.2	11.5	0.1	0.8	21.6
60% TDMAT	9	71.7	19.4		3	9	48.4	2.5	0.7	0.2	12.9	0.1	0.9	22.2
64% TDMAT	9.3	71.2	19.5		3	9.1	47.9	2.5	0.7	0.2	12.6	0.1	0.9	23.1
67% TDMAT	9.7	71	19.3		6.4	23.9	47.6	1.1	0.3	0.1	7.6	0	0.6	12.4
69% TDMAT	9.7	71.6	18.7		4.1	10.8	46.1	2	0.6	0.2	10.5	0	0.8	25
72% TDMAT	13.4	63.9	22.7		7.1	25.9	45.9	0	0	0	4.4	0	0.4	16.3
75% TDMAT	19.2	59.4	21.5		11.6	17.1	35.5	0.9	0.2	0	5.4	0	0.4	28.8
83% TDMAT	21.6	56.5	21.9		19	20.6	30.9	0.3	0.2	0	4.3	0	0.3	24.4
100% TDMAT	21.4	56	22.6		30	20.2	21.9	0.8	0.2	0.1	5.2	0	0.4	21.2
	Error in WDX +- 0.6 %
			N / Ti Value	Error
		50% TDMAT	0.442211	0.0329672
		60% TDMAT	0.463918	0.0340939
		64% TDMAT	0.476923	0.0340894
		67% TDMAT	0.502591	0.0347936
		69% TDMAT	0.518717	0.0361453
		72% TDMAT	0.590308	0.0306934
		75% TDMAT	0.893023	0.037415
		83% TDMAT	0.986301	0.0384811
		100% TDMAT	0.946903	0.0365623

## Sheet: Spectra Transmittance
nm	50% Film	60% Film	64% Film	67% Film	69% Film	72% Film	75% Film	83% Film	100 % Film
2500	59.1792	60.2379	59.5065	21.4908	26.3572	5.67051	3.0596	18.4868	11.2833
2499	59.0945	60.1902	60.2425	21.1658	25.4144	5.16192	3.32756	18.4296	11.578
2498	58.9969	59.047	59.3214	21.2338	25.7163	4.90202	2.2984	18.4056	12.1875
2497	58.6226	60.0579	59.85	21.3938	25.9126	5.11062	3.03575	17.2325	11.9824
2496	59.3417	60.332	59.378	22.0237	26.3236	5.67117	3.23216	17.3948	11.5397
2495	59.6053	60.0184	59.4712	20.6568	25.6394	5.13225	2.06793	17.386	11.5082
2494	59.3295	60.8914	59.5922	21.0847	25.8523	4.86827	3.37794	18.1385	11.9397
2493	58.4421	59.2018	59.8924	21.2772	25.0001	4.87847	3.69484	18.0895	11.7701
2492	59.6386	60.2547	60.5263	21.5745	25.8102	5.5065	3.06678	17.8802	12.11
2491	59.3261	60.5219	59.6616	21.5938	25.8615	4.93672	2.9151	17.335	10.9992
2490	59.1153	60.0684	59.3906	21.7103	25.5556	5.43074	3.24224	17.8354	11.2787
2489	58.5248	59.168	59.0419	21.094	25.6794	4.98282	3.08629	16.9278	11.3436
2488	58.704	60.1609	59.4444	21.3776	25.7074	4.49468	2.27539	18.122	12.1508
2487	59.1844	60.2666	59.6732	21.7337	26.0791	4.8201	2.53739	18.116	10.9481
2486	59.0604	59.9411	59.8935	21.6625	25.4609	5.12869	3.25442	17.557	11.3606
2485	59.2007	59.832	60.5024	20.6904	25.4429	5.17428	3.03762	17.5871	11.8048
2484	58.6893	59.9984	59.5144	21.2232	25.9032	5.22092	2.88092	17.915	11.5149
2483	58.8419	59.962	59.8565	21.145	25.3628	5.46091	2.409	18.0926	11.5866
2482	59.141	59.9256	59.2788	20.853	25.6288	5.63381	3.18616	18.1209	11.3082
2481	59.4382	60.4787	60.3494	21.4724	25.5506	4.25617	2.44196	17.4211	10.9485
2480	59.2926	60.2951	60.4557	21.1812	26.2456	5.28344	2.34076	17.2561	10.8544
2479	58.9381	59.4916	59.2338	22.4453	25.1485	5.37664	2.64787	17.3984	11.8012
2478	58.9049	60.012	59.1912	21.6494	25.4575	5.77537	3.1082	17.7367	11.3036
2477	59.4926	60.3971	59.7464	21.0711	24.7857	5.22376	3.97559	18.0008	11.1498
2476	59.637	59.8242	60.2456	20.6053	25.9844	5.54978	3.01458	18.0922	11.1947
2475	58.8825	60.2501	59.6508	21.2411	24.9436	5.10067	3.43982	18.0835	12.2016
2474	58.7934	60.4769	59.5008	21.2828	25.5151	4.53197	2.02617	17.2621	12.1641
2473	59.4591	59.5034	59.5901	20.8432	25.7845	4.76547	2.91421	17.3498	11.5962
2472	59.2746	59.9045	59.9276	21.1434	25.6414	5.37854	2.77889	17.7532	11.4959
2471	59.4246	60.3487	59.5233	22.0556	25.515	4.58993	2.49895	17.7011	11.8404
2470	58.9562	60.1548	59.5268	21.7844	25.6017	5.55954	3.20874	16.642	11.3877
2469	59.2005	60.4316	59.781	21.3882	25.2353	4.44788	3.65501	17.6791	11.8074
2468	58.5954	60.2116	59.7195	21.55	26.3932	4.54909	2.98753	17.9409	11.2516
2467	59.3079	60.3755	60.1486	21.8947	25.7669	5.07008	1.98737	17.0931	10.9788
2466	59.2453	59.9325	59.8303	21.2528	25.7908	5.12681	2.6167	17.1618	10.5427
2465	59.0384	60.1826	59.8479	21.5279	25.6402	4.75147	2.78595	17.1952	12.0251
2464	58.5968	59.7562	59.3915	20.8948	25.4216	5.06471	3.03144	17.8169	12.0124
2463	59.1673	60.2399	59.367	21.4877	26.0784	4.7339	3.09003	17.1095	12.1025
2462	59.2494	60.3694	59.5832	21.4256	26.2402	5.16729	3.35462	17.7942	11.6971
2461	59.7359	60.1577	59.3804	21.5008	26.0743	4.95365	3.23569	17.1848	10.9612
2460	59.0838	60.3631	60.2493	21.7792	25.9066	4.95198	2.82549	17.8728	11.7289
2459	59.2882	59.8403	59.8224	21.0834	25.24	4.55039	3.10992	17.632	11.7733
2458	59.4138	59.7287	59.8879	21.3205	25.395	5.2831	2.64074	17.4524	12.0509
2457	59.4624	60.4409	59.9891	21.1467	25.2707	5.19383	2.74382	17.3765	11.5822
2456	59.3059	60.4986	60.0164	20.8617	25.638	5.10516	2.96789	17.8269	11.2251
2455	59.5835	60.2112	59.9217	21.3924	25.5603	4.24291	2.43981	17.6385	11.2902
2454	59.2315	60.2706	59.5269	21.7438	25.6507	4.80647	3.58528	17.0529	11.6565
2453	59.3688	59.9644	60.0736	21.4656	26.0684	4.67171	2.79534	17.8146	11.7956
2452	58.9491	59.9738	60.1228	21.552	25.796	4.80167	2.9333	17.5659	12.195
2451	59.0399	60.144	60.2383	21.3945	26.2197	4.49685	2.82992	17.6167	11.7693
2450	59.6513	60.3468	60.2175	20.962	25.6027	4.93846	2.33683	17.9346	11.5769
2449	59.1737	60.1842	59.4494	21.2208	25.6655	5.16787	2.97616	17.333	11.6831
2448	59.4961	60.2306	59.6541	21.4288	25.7501	5.24277	3.01926	17.1227	11.635
2447	59.2314	60.0742	60.2638	21.6547	25.5176	5.1375	2.99835	17.1373	11.6322
2446	59.168	60.0754	59.8627	21.4893	25.8371	5.96513	3.05979	16.7287	11.8413
2445	59.7406	60.8618	60.2336	21.214	25.536	4.98436	2.3708	17.3343	11.6803
2444	59.9412	60.5725	59.9436	21.3801	25.5856	4.75013	3.33082	17.8654	11.6607
2443	60.0668	59.8449	60.1885	21.3296	25.9096	4.65342	3.17973	17.2039	11.7034
2442	59.2816	60.4029	59.7548	21.4409	25.9138	5.05075	2.05054	17.3526	11.3765
2441	59.4467	60.3323	59.4584	21.7036	25.6219	4.6564	2.36567	16.6687	11.2082
2440	59.4948	60.5251	60.0329	21.6168	25.979	4.94093	2.94582	17.0818	11.6142
2439	59.336	60.404	59.97	21.4232	25.4653	4.86215	2.3953	17.0001	11.1593
2438	59.4176	60.1276	59.9284	21.5692	25.4633	4.52604	2.8779	17.1152	11.1226
2437	59.492	59.7702	60.0103	21.9406	26.2568	4.61982	2.77908	17.3971	11.5395
2436	59.7749	60.3386	60.2391	21.7917	25.8688	4.18458	3.39106	17.3442	11.4921
2435	59.525	60.0693	60.0129	21.1026	25.6186	4.37758	2.70702	16.7637	11.1525
2434	59.4974	60.0944	59.9618	20.8995	25.8681	4.76355	2.84821	17.3199	11.0806
2433	60.2447	60.9066	60.4484	21.226	26.0219	4.69752	3.16527	17.1999	11.3326
2432	59.8165	60.4055	60.0734	21.2809	25.7587	4.80077	2.86279	17.2568	11.6536
2431	59.5607	60.4461	59.9933	21.6973	26.1064	5.35572	2.90242	16.9179	11.3251
2430	59.919	60.573	60.2647	21.2521	26.7131	4.65085	2.62433	17.1234	11.1431
2429	59.6215	60.1136	60.3857	21.2063	25.9111	4.47957	2.75289	16.7601	11.6365
2428	59.8175	60.6681	60.1727	21.2085	25.5985	4.23522	2.99235	16.944	11.412
2427	59.4099	60.4098	59.8613	21.4057	25.7445	5.01826	2.94924	17.1287	11.2237
2426	59.7905	60.6081	60.1483	21.4968	25.7104	4.74695	2.96812	17.1547	11.3089
2425	59.7745	60.4517	60.1741	21.128	25.723	4.73057	2.90221	16.8297	11.3756
2424	60.1137	60.4556	60.1034	21.5476	26.1574	4.64365	2.33636	16.9175	10.9637
2423	60.1359	60.6769	60.318	21.6681	26.1053	4.92379	2.58085	17.22	11.0766
2422	59.9173	60.5808	60.6981	21.2015	25.8819	4.31072	3.12785	16.9355	11.2766
2421	59.8817	60.6768	60.228	21.1045	26.23	4.67927	2.80857	17.098	11.4952
2420	59.9301	60.9632	59.9602	20.876	26.186	4.92972	2.33341	16.8437	11.3686
2419	60.2549	61.0385	60.2964	21.0067	25.7	4.80508	2.65098	17.1283	11.4011
2418	60.108	61.1939	60.6886	20.8762	25.7564	4.44282	2.40336	17.0278	11.6804
2417	59.8019	60.8478	60.7795	21.1135	25.9864	4.61914	3.26146	16.9208	11.6188
2416	59.8235	60.5382	60.2191	21.5463	25.6428	4.7862	2.29683	16.9168	10.9251
2415	60.0057	60.7535	60.4198	21.7239	25.8613	4.91175	3.00554	17.1176	11.5217
2414	59.9432	60.5126	60.1063	21.473	26.0315	4.95002	3.05441	16.6013	11.5619
2413	60.1628	60.4478	60.3528	21.0881	25.9582	5.27314	2.45807	16.7465	11.3296
2412	60.3451	60.5595	60.8338	20.8548	26.1963	4.77702	2.49681	16.9718	10.8195
2411	60.2141	60.7443	60.7156	21.1799	25.6416	5.15317	2.60471	16.9282	11.257
2410	60.0692	60.6185	60.353	21.1769	25.991	4.79867	2.66999	17.2972	11.564
2409	59.8667	60.3972	60.2208	20.9341	25.9905	4.22777	3.04172	17.0513	11.0745
2408	60.1899	60.8785	60.6051	20.7841	25.786	4.40355	2.77126	16.6841	11.455
2407	60.0461	60.4869	60.6658	21.077	25.7026	4.81754	2.83932	16.8405	11.33
2406	59.8643	60.481	60.2842	21.2439	25.6564	4.69333	2.71549	17.1132	11.0398
2405	59.941	60.402	60.267	21.4879	26.1357	4.47476	2.42578	17.286	11.2752
2404	60.0877	60.5912	60.4873	21.1126	26.3571	4.36131	3.04284	16.6647	11.5066
2403	60.3457	60.6928	60.6004	21.2073	26.0471	4.40656	2.89366	16.6723	11.2394
2402	59.7427	60.511	60.157	21.3115	25.9991	4.52654	3.01259	16.9059	10.723
2401	59.6573	60.4269	60.0886	21.0534	25.6377	4.65727	2.82183	16.3696	11.0423
2400	59.9013	60.6585	60.0849	20.9868	25.6657	5.18934	2.85623	16.432	11.4291
2399	60.1764	60.9589	60.5713	20.9253	26.052	4.61225	2.93682	16.7512	11.5322
2398	60.2188	60.8495	60.4503	20.9509	26.3029	4.26628	2.56263	17.1002	11.494
2397	60	60.8352	60.3458	20.9932	26.323	4.18861	2.68976	17.0299	11.4716
2396	60.0218	60.9248	60.4453	20.8694	26.1655	4.2366	2.52233	16.5452	11.4957
2395	60.0245	61.0121	60.338	21.2607	25.6798	4.37564	2.93606	16.7141	11.3612
2394	60.1972	60.9344	60.6355	21.2697	26.1839	4.86034	2.90551	16.794	11.0376
2393	59.9963	60.3158	60.3317	21.1819	26.201	4.48663	2.37713	16.9229	10.8227
2392	60.0933	60.7082	60.4081	21.2919	26.1859	4.38996	2.27943	16.8912	11.2711
2391	60.1919	61.0136	60.6135	21.1875	26.4363	4.76953	2.22153	16.8462	11.0963
2390	60.4463	61.0783	60.5696	21.2633	25.9451	4.80527	2.21163	16.6993	11.3049
2389	60.2547	61.0553	60.7856	21.0271	25.8391	4.4794	2.51158	16.5822	11.491
2388	60.214	60.8667	60.6752	20.994	26.1168	4.51637	2.49284	16.7293	11.1736
2387	60.062	60.3877	60.2627	21.1321	26.2548	4.61206	3.06793	16.8571	10.9146
2386	59.9861	60.4312	60.2771	21.0666	25.966	4.45051	3.05381	16.7135	10.9834
2385	59.6491	60.6543	60.2343	21.0739	25.9288	4.48896	2.83639	16.6334	10.888
2384	59.6904	60.9286	60.3717	20.8628	26.0659	4.41964	2.34699	16.5229	11.1549
2383	60.2275	60.9017	60.5677	21.0529	26.0567	4.51343	2.45503	16.1824	10.8566
2382	60.2163	60.7918	60.5173	21.2266	26.0478	4.64213	2.71127	16.2523	10.8076
2381	59.9876	60.9369	60.6676	20.9793	25.8329	4.77598	2.47792	16.601	11.2123
2380	60.0203	61.1154	60.9237	21.0646	25.7431	4.4804	2.75996	16.6444	11.316
2379	60.1631	61.1441	60.784	20.901	25.7162	4.47444	2.96307	16.475	11.1128
2378	59.9664	60.6754	60.5543	20.9044	25.9446	4.36482	2.59028	16.2997	11.2666
2377	60.193	60.6046	60.5285	20.973	26.0439	4.39785	2.73679	16.3445	11.058
2376	60.2807	60.624	60.4647	20.8265	25.8746	4.39946	2.82588	16.1069	10.8102
2375	59.8639	60.7246	60.3023	20.6995	25.882	4.12192	2.35501	16.2696	11.045
2374	59.9789	60.6366	60.3164	20.9197	25.8998	4.25818	2.32008	16.421	11.1705
2373	60.0088	60.4672	60.4215	21.1661	25.7117	4.43756	2.91804	16.2315	11.2761
2372	60.0902	60.6358	60.1939	20.9963	25.8591	4.69067	2.79233	16.5061	11.1228
2371	60.2954	60.8033	60.1452	20.8644	26.0774	4.52127	2.39702	16.262	10.7566
2370	60.2844	61.0564	60.4191	21.0417	26.0313	4.33884	2.55355	16.1204	10.8982
2369	60.3744	60.8904	60.57	20.7733	26.1594	4.21183	2.42921	16.1067	11.2031
2368	60.1643	60.6788	60.1022	20.6474	26.2834	4.29788	2.22838	16.1648	11.2024
2367	60.0044	60.5731	60.0731	20.6867	26.0082	4.30728	2.26789	16.2138	10.8151
2366	60.1176	60.4949	60.0894	20.7883	25.8118	4.0874	2.68025	16.0738	10.6104
2365	59.847	60.4504	59.9816	20.9305	25.8672	4.50633	2.91914	16.3811	11.0069
2364	59.9067	60.525	60.3402	20.8945	26.0274	4.60674	2.63964	16.4081	10.9238
2363	60.0372	60.6202	60.4902	20.8107	26.0316	4.24726	2.57364	15.9665	11.076
2362	60.0243	60.8617	60.4467	20.8043	25.9327	4.43683	2.7673	15.9371	11.1047
2361	60.0508	60.8572	60.4372	21.0094	25.673	4.2123	2.69031	16.2733	10.8098
2360	60.1791	60.7403	60.2969	20.9731	25.9401	4.06137	2.43137	16.0165	10.8991
2359	60.3031	60.8288	60.1578	21.1361	26.0647	4.17495	2.22675	16.1031	10.9855
2358	60.0802	60.8164	60.2225	20.9566	25.8213	4.16588	2.53872	16.3174	10.9442
2357	59.994	60.5983	60.2625	20.4218	26.0648	4.38096	2.72539	16.1875	11.0305
2356	59.9353	60.3249	60.0507	20.5264	26.2306	4.57099	2.57846	16.2275	10.9422
2355	60.0227	60.4147	60.2092	20.3135	25.9955	4.25668	2.64049	16.0781	10.7497
2354	59.8429	60.4956	60.2444	20.4151	25.8616	3.93538	2.53671	16.3925	10.735
2353	59.7495	60.3589	60.2571	20.928	25.8897	4.14048	2.63247	16.3625	10.943
2352	60.079	60.4032	60.1085	20.9163	25.6148	4.3703	2.57197	15.7186	10.8096
2351	60.2316	60.428	60.0295	20.8287	25.7379	4.20765	2.198	15.6731	10.698
2350	60.2199	60.5935	60.3078	20.6123	26.0765	4.24302	2.00784	16.299	10.9358
2349	60.1022	60.7451	60.4137	20.4962	26.0552	4.40853	1.9408	16.1763	10.796
2348	60.0241	60.5084	60.3488	20.3035	25.7115	4.25894	2.20183	15.8723	10.8092
2347	59.9282	60.3407	60.0884	20.4253	25.8037	3.97992	2.3454	15.9821	10.8917
2346	60.021	60.3991	60.1094	20.8038	26.0347	4.12939	2.44316	15.8813	10.9095
2345	60.0959	60.5827	60.2843	20.8679	25.9218	4.18565	2.50405	15.8412	11.0002
2344	60.0848	60.8597	60.3973	20.5216	25.8306	3.66907	2.39022	16.0576	10.8433
2343	59.9602	60.6531	60.288	20.4895	25.8398	3.99608	2.38876	15.8316	10.6481
2342	60.1017	60.5735	60.4421	20.8708	25.8778	4.35978	2.22657	15.5682	10.8145
2341	59.9963	60.6219	60.4998	20.9799	25.8654	4.3763	2.52912	15.6285	10.9206
2340	60.0631	60.3735	60.2917	20.5598	25.9647	4.23253	2.76417	15.5961	10.7559
2339	60.0559	60.4378	60.1672	20.7258	26.0102	3.96586	2.65925	15.696	10.7683
2338	60.0238	60.506	59.9177	20.7066	25.7431	4.03937	2.23211	15.5234	10.6562
2337	59.9435	60.5886	59.9294	20.363	25.6245	4.00428	2.17636	15.4622	10.6831
2336	60.064	60.6976	60.3161	20.5466	25.9477	3.93013	2.43302	15.8134	10.5884
2335	60.0463	60.4333	60.059	20.4916	26.0711	4.14534	2.22334	16.0198	10.8202
2334	59.7095	60.312	59.9891	20.3103	25.835	4.28233	2.21247	15.7014	10.9509
2333	59.9992	60.4224	60.2755	20.3453	25.9124	4.02383	2.24241	15.5603	10.8526
2332	59.8709	60.2462	60.141	20.5194	25.7892	3.93516	2.32673	15.692	10.6506
2331	59.8345	60.4028	60.026	20.7047	25.7932	3.8935	2.52942	15.6165	10.689
2330	59.7011	60.2031	59.9302	20.5902	25.829	4.17217	2.51994	15.5861	11.0355
2329	59.7956	60.23	60.0217	20.5073	25.9222	4.22043	2.31759	15.6989	10.746
2328	59.8589	60.3591	60.1014	20.4803	25.9073	3.91237	2.28421	15.5448	10.5976
2327	59.9211	60.3312	59.999	20.2373	25.9882	3.87406	2.41065	15.5601	10.7159
2326	60.0027	60.3044	59.9358	20.3597	25.7745	3.86375	2.27906	15.5085	10.72
2325	59.9592	60.2733	60.2056	20.3848	25.7287	4.00301	2.13709	15.0411	10.5718
2324	59.9992	60.301	60.1306	20.2765	25.7883	4.0598	2.12199	15.169	10.6093
2323	59.5586	59.9584	59.6824	20.1683	25.5525	3.97602	2.29953	15.4183	10.5586
2322	59.5195	60.0121	59.6228	20.2455	25.8076	3.93705	2.47992	15.4708	10.6107
2321	59.8279	60.3109	59.9972	20.3922	25.8695	4.01161	2.4361	15.5332	10.7723
2320	59.801	60.3551	59.9778	20.1783	25.7247	3.87861	2.17023	15.5054	10.6093
2319	59.5993	60.1297	59.9282	20.2899	25.5959	3.98667	2.37241	15.4942	10.512
2318	59.5322	60.1134	59.8378	20.3538	25.4371	4.16011	2.60348	15.4229	10.5071
2317	59.7164	60.2563	59.8854	20.2081	25.5994	3.87125	2.73174	15.2711	10.4885
2316	60.0348	60.3131	60.0725	20.0732	25.8657	4.1109	2.27594	15.1983	10.4578
2315	59.9948	60.3692	60.094	20.3538	25.8357	4.30043	2.25371	15.35	10.3489
2314	59.9313	60.2285	60.1553	20.6239	25.7099	3.94786	2.27721	15.4	10.7031
2313	59.9697	60.3978	60.0473	20.5602	25.9361	3.81283	2.34885	15.0582	10.9057
2312	59.8666	60.4485	60.1143	20.2147	25.8917	4.11745	2.35086	15.3149	10.5375
2311	59.833	60.1498	59.9902	20.233	25.659	4.1889	2.39238	15.2616	10.6112
2310	59.8711	60.2361	59.8581	20.1159	25.606	3.6516	2.24318	15.1669	10.4773
2309	59.6755	60.3041	59.6333	19.9238	25.6865	3.93761	2.3721	15.0913	10.5387
2308	59.8906	60.2288	59.8598	20.0948	25.6737	3.90691	2.37972	14.9912	10.4566
2307	60.074	60.1696	59.8816	19.9733	25.4717	3.79114	2.28426	15.0442	10.3576
2306	59.7076	60.2081	59.7837	20.2285	25.7393	3.99393	2.23058	15.0426	10.4328
2305	59.535	59.8939	59.826	20.014	25.7264	4.2494	2.12557	15.3441	10.6326
2304	59.5763	59.9739	59.8673	20.1062	25.5474	4.16323	2.13101	15.2481	10.4583
2303	59.6275	59.9254	59.6078	20.0991	25.6635	4.01037	2.17426	15.0155	10.4121
2302	59.5955	60.0477	59.9095	20.2177	26.0129	4.06255	2.37649	15.1985	10.5863
2301	59.6532	60.2361	59.859	20.1018	25.7034	3.71524	2.27704	15.2849	10.411
2300	59.7786	60.0129	59.898	20.3568	25.5142	3.84565	2.23542	15.0874	10.3566
2299	59.4486	59.8133	59.8408	20.1034	25.6355	3.68653	2.18731	14.9847	10.2278
2298	59.3216	59.6257	59.6564	19.9538	25.799	3.68901	2.12979	15.0285	10.4209
2297	59.5528	59.823	59.5462	19.9277	25.6933	3.83346	2.21597	14.9409	10.489
2296	59.5037	59.8362	59.4077	20.0431	25.534	4.02673	2.09353	14.9612	10.4018
2295	59.4992	59.9198	59.5035	20.0032	25.6225	3.91267	2.19263	14.916	10.3234
2294	59.5174	59.8449	59.7242	20.0865	25.5118	3.81531	2.20574	14.8703	10.3037
2293	59.4237	59.9275	59.7177	20.0268	25.8028	3.92294	2.05237	14.7209	10.1804
2292	59.478	60.1693	59.6585	20.0877	25.6887	3.90208	2.26023	14.8661	10.1739
2291	59.6728	60.1293	59.7143	20.0768	25.6896	3.91617	2.32666	14.8129	10.4449
2290	59.5427	59.9355	59.5943	19.864	25.6506	3.80929	2.2334	15.0161	10.2571
2289	59.3944	59.8028	59.3927	19.6837	25.4551	3.61391	2.13978	14.8568	9.98018
2288	59.3191	59.9113	59.3723	20.0811	25.6698	3.6663	2.56645	14.8838	10.1135
2287	59.4011	59.6954	59.3864	20.0291	25.7475	3.67051	2.3308	14.8239	10.1528
2286	59.5293	59.77	59.5464	19.8694	25.654	3.69996	2.01932	14.6204	10.4387
2285	59.4503	59.683	59.4881	19.9196	25.6186	3.82955	1.88579	14.7954	10.2718
2284	59.4121	59.7078	59.3915	19.9952	25.4639	3.87489	2.09452	14.6408	10.1429
2283	59.3343	59.7121	59.4843	19.826	25.6156	3.67102	2.32717	14.8015	10.233
2282	59.5093	59.6678	59.3968	19.9687	25.647	3.89934	2.36127	14.8132	10.1948
2281	59.6001	59.5864	59.3903	19.9865	25.5539	3.88479	2.24523	14.6637	10.0625
2280	59.4236	59.8323	59.3876	19.7305	25.4654	3.62057	2.12511	14.4381	10.3621
2279	59.34	59.8516	59.3941	19.6329	25.4853	3.54885	2.27452	14.4952	10.3683
2278	59.3136	59.8738	59.4677	19.6767	25.5693	3.74101	2.15419	14.5143	9.91
2277	59.3024	59.6342	59.494	19.8568	25.5914	3.62377	2.13929	14.6632	10.1097
2276	59.4128	59.7205	59.3197	19.7253	25.458	3.67205	2.04102	14.7749	10.2697
2275	59.3414	59.9108	59.4542	19.928	25.5093	3.71222	2.23206	14.4064	10.2634
2274	59.2841	59.6382	59.3383	19.7381	25.5357	3.62334	1.97898	14.66	10.3954
2273	59.4692	59.6603	59.4929	19.6426	25.8222	3.6826	2.1965	14.5687	10.1378
2272	59.4143	59.6294	59.2852	19.6862	25.5986	3.60118	2.31817	14.6309	9.9041
2271	59.3012	59.5803	59.351	19.7434	25.5547	3.66723	2.03581	14.6903	10.0934
2270	59.3454	59.5987	59.1911	19.6944	25.4336	3.83372	2.14095	14.3959	9.95804
2269	59.2597	59.5872	58.9699	19.7172	25.3791	3.74343	2.23153	14.5215	10.005
2268	59.2789	59.6215	59.2237	19.7553	25.59	3.5366	2.25481	14.4318	9.97663
2267	59.3749	59.6289	59.2455	19.7115	25.4802	3.62457	2.1769	14.1687	9.9928
2266	59.2733	59.7107	59.2522	19.5597	25.4432	3.70577	2.12438	14.3773	10.0147
2265	58.793	59.4178	59.0589	19.5272	25.3483	3.4106	1.79114	14.4073	9.98219
2264	59.1067	59.5999	59.2069	19.575	25.2075	3.56456	2.06035	14.186	10.0234
2263	59.3959	59.7699	59.2485	19.5282	25.3534	3.56189	2.23865	14.423	9.96986
2262	59.1424	59.5292	59.3487	19.674	25.5	3.67523	2.11661	14.5445	10.0913
2261	59.2591	59.3386	59.158	19.5275	25.3742	3.42987	1.93695	14.1574	9.91115
2260	59.1741	59.3887	59.0125	19.3877	25.2365	3.57138	2.20573	14.1017	9.80694
2259	59.0409	59.3498	58.9244	19.4086	25.3153	3.64926	2.08814	14.3806	9.86739
2258	59.158	59.4909	59.3129	19.3679	25.3307	3.57097	1.9877	14.2378	10.0342
2257	59.0155	59.3219	58.9487	19.2354	25.2866	3.7957	1.95401	14.229	9.87162
2256	59.0954	59.2704	58.8693	19.3339	25.2037	3.79333	2.09208	14.32	9.94826
2255	59.2191	59.6164	59.0125	19.3952	25.3502	3.54742	1.98143	14.2771	9.87578
2254	58.9569	59.3387	58.9295	19.2949	25.3325	3.50581	1.87749	14.0878	9.94434
2253	59.0573	59.3785	58.8901	19.4499	25.4297	3.5553	2.09271	14.1278	9.90193
2252	59.0224	59.2042	58.8508	19.5858	25.1522	3.66548	2.06135	14.2225	10.0385
2251	59.0012	59.2572	58.8527	19.1042	25.2949	3.53981	2.02854	14.0891	10.0521
2250	59.1905	59.2231	58.9946	19.3553	25.585	3.40542	2.04644	14.0689	9.86872
2249	59.1258	59.2159	59.0611	19.4352	25.3988	3.53463	2.1736	14.0633	9.95619
2248	59.0854	59.2164	59.1373	19.3469	25.1914	3.61785	2.22004	14.0277	9.68468
2247	59.119	59.1014	58.9878	19.225	25.3102	3.63339	1.91152	13.8707	9.80371
2246	58.9886	59.1656	59.0296	19.164	25.235	3.57913	2.12127	13.9562	10.0875
2245	59.0662	59.2365	58.8746	19.4041	25.4188	3.74057	2.05792	14.0161	9.81892
2244	59.1933	59.2201	58.9285	19.203	25.4337	3.56015	2.29542	13.8343	9.82955
2243	58.8953	59.0947	58.7856	19.0824	25.2936	3.70848	2.04116	14.0464	9.94017
2242	58.9975	59.2491	58.7434	19.1204	25.2295	3.47614	1.95476	13.9748	9.75843
2241	58.8991	59.1935	58.7754	19.2406	25.1839	3.23733	2.06814	14.0731	9.79771
2240	58.9235	59.1022	58.7849	19.2951	25.2278	3.41466	1.97562	13.9395	9.7996
2239	58.8244	59.1164	58.7819	18.9514	25.327	3.68288	2.0787	13.8352	9.64974
2238	58.856	59.1464	58.8103	19.2174	25.2379	3.5249	2.10748	13.9852	9.63305
2237	58.9272	59.0779	58.7769	19.2527	25.1928	3.67658	2.09082	13.8093	9.78943
2236	58.9086	59.1999	58.7694	19.1548	25.2175	3.64772	1.96862	13.9918	9.81793
2235	58.8013	59.0647	58.7051	19.1579	25.1615	3.26004	2.00878	13.8056	9.89156
2234	58.7909	59.1254	58.7238	18.9326	25.0942	3.60507	2.00274	13.9279	9.78011
2233	58.8749	59.1456	58.5156	19.0641	25.2962	3.46484	2.015	13.7807	9.72872
2232	58.7155	59.0552	58.7482	19.2498	25.1794	3.24682	2.01559	14.0336	9.90503
2231	58.8611	58.8976	58.5859	19.1818	25.0738	3.67259	2.1346	13.6987	9.71016
2230	58.7373	59.0969	58.6484	19.0127	25.1319	3.43878	1.9422	13.905	9.83649
2229	58.7598	59.1006	58.503	19.0199	25.1953	3.6036	1.96263	13.7319	9.71994
2228	58.7712	58.9297	58.4705	19.1534	25.1222	3.38161	1.92227	13.705	9.51864
2227	58.9064	58.8767	58.6331	18.9125	25.1141	3.63882	2.10112	13.9025	9.48719
2226	58.6981	58.9227	58.6117	18.8713	25.2232	3.58389	2.02563	13.6655	9.74197
2225	58.7238	58.881	58.6788	18.7902	25.0898	3.32737	2.02939	13.7379	9.61436
2224	58.7165	59.0193	58.4339	18.9282	25.1698	3.22975	1.87647	13.659	9.76851
2223	58.8615	58.9813	58.618	18.8941	25.1942	3.43031	1.92574	13.5425	9.66286
2222	58.8297	58.953	58.67	18.8269	25.2795	3.48182	2.2467	13.7019	9.74788
2221	58.8187	58.744	58.6624	18.887	24.9591	3.29667	1.8466	13.7631	9.83758
2220	58.7247	59.1042	58.688	18.789	25.2787	3.3669	2.05815	13.4942	9.43867
2219	58.9623	59.1118	58.6694	18.8627	25.1551	3.29185	2.15323	13.6106	9.52908
2218	58.8432	58.9611	58.4846	19.0106	25.1402	3.49843	1.83043	13.6002	9.52773
2217	58.9256	59.1562	58.7657	18.9597	25.288	3.38851	2.16199	13.6122	9.44941
2216	58.8253	59.1395	58.6864	18.8442	25.1071	3.30188	2.00282	13.6759	9.78409
2215	58.7867	59.0356	58.7102	18.9234	25.2684	3.49084	1.7958	13.4309	9.41956
2214	58.8878	58.7928	58.7943	18.7116	25.0819	3.47555	2.23348	13.6435	9.7101
2213	58.8181	58.9868	58.5644	19.1361	25.0747	3.41553	1.90264	13.4673	9.44087
2212	59.0028	59.023	58.6292	18.8445	24.9877	3.4317	1.99608	13.5866	9.45636
2211	58.9727	58.9656	58.5691	18.8626	25.4397	3.38532	2.08399	13.5954	9.64288
2210	58.8502	59.0133	58.6651	18.8722	25.255	3.50347	1.97688	13.4415	9.58964
2209	59.0181	59.1012	58.8185	18.938	25.2792	3.51344	2.03427	13.672	9.59049
2208	58.8944	58.9581	58.6363	18.7068	25.0509	3.44948	1.96227	13.4306	9.56713
2207	58.9665	59.0444	58.64	18.8846	25.2993	3.21934	1.8875	13.5651	9.4527
2206	58.9041	58.9212	58.7475	18.8095	25.217	3.53132	1.95282	13.524	9.53542
2205	58.9035	59.0853	58.7018	18.8376	25.4751	3.21456	2.10722	13.5905	9.36447
2204	59.0366	58.9044	58.7709	18.9485	25.3102	3.1146	2.06084	13.5258	9.41061
2203	59.3019	59.1255	58.8532	18.812	25.2637	3.46859	1.84312	13.3058	9.41038
2202	59.157	59.302	58.9115	18.6618	25.2005	3.28234	2.03098	13.1261	9.59051
2201	59.2766	59.1678	58.9204	18.9291	25.1622	3.25511	1.92687	13.5242	9.382
2200	59.0996	59.1941	58.8084	18.6723	25.2427	3.39823	2.05697	13.5946	9.64859
2199	59.1828	59.0081	58.6774	18.8138	25.3715	3.38701	1.98778	13.4913	9.44294
2198	59.1483	59.1839	58.8568	18.8649	25.2517	3.38776	1.75559	13.5655	9.38504
2197	59.0462	59.2739	58.788	18.7581	25.3105	3.45789	2.04314	13.4476	9.60131
2196	59.1992	59.133	58.939	18.8737	25.3431	3.33956	2.09409	13.4713	9.64039
2195	59.11	59.264	58.9177	18.9568	25.1903	3.38678	2.03794	13.5593	9.461
2194	59.2627	59.3923	59.0203	18.8478	25.3729	3.32547	1.9752	13.3637	9.40892
2193	59.291	59.4888	58.9814	18.6572	25.2319	3.45191	2.0399	13.475	9.56129
2192	59.4824	59.4629	59.0604	18.8062	25.2537	3.27733	2.00894	13.4234	9.49574
2191	59.3374	59.2901	58.9463	18.8665	25.2955	3.39573	2.05553	13.2523	9.33334
2190	59.5073	59.4568	59.0615	18.8863	25.4017	3.20079	2.03164	13.4045	9.51187
2189	59.6207	59.4723	59.1736	18.8797	25.4806	3.34236	1.90799	13.476	9.47742
2188	59.5548	59.2999	59.1925	18.7519	25.2239	3.27915	1.84861	13.2229	9.42049
2187	59.6569	59.5726	59.3649	18.6729	25.3385	3.33032	1.90803	13.4312	9.49152
2186	59.5758	59.5956	59.1516	18.7969	25.3739	3.4984	2.04495	13.1584	9.2527
2185	59.601	59.637	59.1656	18.8836	25.5309	3.44702	1.8732	13.5011	9.30125
2184	59.7333	59.6686	59.2801	18.8384	25.5175	3.56648	1.87737	13.4045	9.31182
2183	59.6746	59.791	59.3386	18.8395	25.4506	3.41278	2.03825	13.5211	9.64837
2182	59.6998	59.6249	59.3069	18.8656	25.52	3.32971	2.13976	13.3113	9.57236
2181	59.6251	59.7599	59.3272	18.9173	25.6424	3.0767	1.95883	13.2616	9.52843
2180	59.961	59.8544	59.4136	18.6524	25.4401	3.40536	1.93017	13.3006	9.42705
2179	59.8086	59.8418	59.5391	18.6696	25.2738	3.44483	1.88737	13.2519	9.45218
2178	59.7468	59.8976	59.5371	18.8248	25.5796	3.24499	2.0092	13.4325	9.33297
2177	59.8637	59.6553	59.3901	18.8052	25.5491	3.28332	2.0311	13.4027	9.42622
2176	60.0289	59.7977	59.4808	18.9962	25.5202	3.12681	2.00122	13.1682	9.41973
2175	59.9089	59.7754	59.5909	18.6784	25.5556	3.25416	2.13925	13.4008	9.25076
2174	59.9757	59.7772	59.5977	18.7171	25.5619	3.52341	1.8361	13.4028	9.44551
2173	60.0355	60.0147	59.6539	18.9313	25.5706	3.44255	2.16217	13.3452	9.25552
2172	59.8896	60.0417	59.5582	18.7212	25.6299	3.43061	1.94015	13.3005	9.4138
2171	59.9961	59.9981	59.5078	18.7166	25.6724	3.51231	1.90621	13.2369	9.41403
2170	60.091	59.9773	59.6503	18.8562	25.745	2.99223	1.83861	13.1939	9.38118
2169	60.1372	59.9843	59.7601	18.8844	25.5573	3.14861	2.26433	13.2254	9.42787
2168	60.1753	60.2037	59.6062	18.8527	25.6162	3.30118	1.81329	13.2789	9.38558
2167	59.9881	60.0105	59.7003	18.8483	25.5673	3.28162	1.80637	13.2263	9.31514
2166	60.1758	60.0321	59.71	18.7254	25.6893	3.36918	2.15988	13.2484	9.25585
2165	60.3134	60.2363	59.9089	18.8476	25.7254	3.12095	1.93832	13.3161	9.27175
2164	60.2848	60.0822	59.9411	18.7703	25.6512	3.22603	1.90614	13.2428	9.3677
2163	60.2588	60.2048	59.7636	18.9089	25.6414	3.41058	2.0522	13.1563	9.21922
2162	60.2375	59.9782	59.7373	18.6978	25.5155	3.10662	1.90805	13.3226	9.42616
2161	60.2222	60.0263	59.7503	18.726	25.7793	3.10855	2.00214	13.2461	9.40201
2160	60.2942	59.977	59.7416	18.6486	25.7845	3.42392	1.85376	13.1075	9.22361
2159	60.3493	59.9294	59.7747	18.7439	25.5292	3.16523	1.76311	13.1407	9.34951
2158	60.3496	60.303	59.8059	18.5996	25.6299	3.44612	1.7968	13.1084	9.15645
2157	60.2006	60.1011	59.749	18.7427	25.6102	3.20741	1.91328	12.9758	9.15844
2156	60.2137	60.1612	59.676	18.6144	25.6018	3.14025	1.98688	13.1668	9.44656
2155	60.4443	60.208	59.8274	18.6012	25.6453	3.13785	1.96847	13.157	9.28637
2154	60.3353	60.2153	59.7617	18.5219	25.6823	3.11798	2.04203	12.9924	9.24958
2153	60.2752	60.0714	59.81	18.6504	25.6215	3.01758	1.84263	13.0646	9.18607
2152	60.3645	60.0707	59.7228	18.7282	25.5623	3.29838	1.90518	12.8415	9.04679
2151	60.4107	60.1749	59.8919	18.6516	25.7659	3.35264	1.83453	12.8822	9.17303
2150	60.3058	60.0752	59.8991	18.6263	25.6049	3.4113	1.90129	12.9976	9.39895
2149	60.2329	60.1797	59.8505	18.5696	25.6628	3.21714	1.92551	12.7829	9.3483
2148	60.3344	60.266	59.8057	18.5735	25.7852	3.17447	2.02205	12.9119	9.174
2147	60.4395	60.4165	59.8404	18.5091	25.7048	3.02267	1.81468	12.9041	9.07404
2146	60.3471	60.1412	59.667	18.4315	25.4949	3.10883	1.95854	12.8131	9.15059
2145	60.5222	60.2609	59.8386	18.4951	25.7147	3.0506	1.82262	12.7593	9.1998
2144	60.4282	60.0899	59.808	18.4122	25.7519	3.29237	1.75878	12.7511	9.24043
2143	60.3116	60.1192	59.9046	18.3526	25.5192	3.10601	1.89772	12.7526	9.18588
2142	60.2785	60.2499	59.7649	18.414	25.3193	2.99788	1.76629	12.69	9.35424
2141	60.2506	60.0399	59.7476	18.4323	25.5551	3.13963	1.85603	12.7773	9.11852
2140	60.3096	59.9674	59.7335	18.4405	25.5597	3.39312	1.85137	12.6813	9.17941
2139	60.2573	59.9031	59.7733	18.18	25.4522	3.0943	1.71087	12.7423	9.08468
2138	60.2631	60.1013	59.833	18.3101	25.5234	3.03206	1.7422	12.6497	9.15111
2137	60.498	60.3405	59.9478	18.5059	25.6748	3.15103	1.92465	12.6065	9.20191
2136	60.4365	60.1455	59.8964	18.4093	25.7087	3.0341	1.92348	12.5198	9.09529
2135	60.3244	60.0803	59.7332	18.3103	25.6619	3.00801	1.59434	12.6414	9.04849
2134	60.3416	60.0542	59.6916	18.3474	25.4879	2.95157	1.67296	12.7175	9.01283
2133	60.4168	60.0946	59.6689	18.2408	25.3865	2.8651	1.72124	12.7049	8.86993
2132	60.332	60.1357	59.6511	18.3397	25.5152	2.87703	1.57465	12.5708	8.90337
2131	60.3292	60.0906	59.6414	18.2455	25.382	3.01022	1.67087	12.5545	9.03993
2130	60.3772	60.148	59.8058	18.048	25.51	2.97757	1.88333	12.4308	9.13399
2129	60.4907	60.1798	59.8126	18.0789	25.6302	2.97084	1.77136	12.5663	9.04764
2128	60.5147	60.1398	59.8528	18.1624	25.5004	2.9923	1.77908	12.5403	8.97617
2127	60.3232	60.1538	59.7802	18.2078	25.5625	2.99429	1.65218	12.2947	8.99995
2126	60.3444	60.2015	59.8393	18.0585	25.4938	2.95793	1.72199	12.35	9.08285
2125	60.3013	60.2163	59.7454	18.1018	25.4779	2.8396	1.68494	12.3207	9.05294
2124	60.2557	60.0349	59.5386	17.9829	25.412	2.87361	1.75615	12.4284	9.08888
2123	60.4866	60.0917	59.7473	18.0958	25.4653	2.92344	1.62735	12.4642	9.12274
2122	60.4175	60.1468	59.7275	18.0701	25.5516	2.8022	1.62511	12.4005	8.95989
2121	60.322	60.1135	59.7625	18.0791	25.5689	2.96015	1.61131	12.3899	8.90607
2120	60.2892	60.0458	59.662	17.9879	25.4763	2.86445	1.61273	12.3063	9.03869
2119	60.3548	60.1022	59.6622	18.0423	25.4576	2.83321	1.64869	12.2845	8.91102
2118	60.5059	60.2263	59.6498	18.0872	25.3415	2.7917	1.63838	12.3101	8.75367
2117	60.3832	60.0833	59.5868	17.9772	25.4348	2.84365	1.64533	12.2761	8.89445
2116	60.3561	60.1393	59.68	17.9385	25.4609	2.98925	1.60716	12.1924	8.90496
2115	60.4243	60.1999	59.7373	18.0505	25.3758	2.92532	1.68558	12.2999	9.03623
2114	60.4623	60.1909	59.7744	17.9715	25.428	2.90372	1.70279	12.3306	8.87665
2113	60.6243	60.1991	59.8951	17.8835	25.5719	2.78537	1.72323	12.2236	8.84018
2112	60.5065	60.0907	59.7897	17.9047	25.3848	2.77578	1.61491	12.174	8.90237
2111	60.382	60.0874	59.7365	17.8978	25.4162	2.83236	1.52144	12.1822	8.89464
2110	60.3693	60.0887	59.7261	17.9217	25.4916	2.88654	1.5885	12.0815	8.80809
2109	60.4104	60.0476	59.7482	17.8708	25.4851	2.89078	1.64509	12.1628	8.88598
2108	60.4487	60.0329	59.6748	17.8358	25.4864	2.82205	1.5674	12.2501	8.99319
2107	60.3427	60.0629	59.6563	17.8703	25.4131	2.74451	1.55359	12.2184	8.88981
2106	60.3166	60.1065	59.6662	17.8732	25.4156	2.83399	1.58703	12.0144	8.69581
2105	60.3446	59.9769	59.606	17.8826	25.3461	2.78455	1.64907	12.077	8.66341
2104	60.2606	59.9267	59.5621	17.8514	25.3787	2.77912	1.64638	12.1741	8.74897
2103	60.3672	59.9904	59.5648	17.7983	25.4047	2.91309	1.61027	12.0483	8.87026
2102	60.3935	60.0639	59.6793	17.7686	25.3908	2.92534	1.65379	11.9194	8.92259
2101	60.4306	60.0621	59.6868	17.6699	25.4384	2.82662	1.65204	12.0332	8.77535
2100	60.4932	60.0657	59.7387	17.731	25.4319	2.76413	1.53284	11.9959	8.81416
2099	60.515	60.1413	59.6777	17.7974	25.3518	2.75822	1.58285	11.9969	8.84126
2098	60.4861	60.1585	59.6686	17.7127	25.337	2.76702	1.66054	11.9569	8.73622
2097	60.4364	60.0338	59.6707	17.7411	25.3746	2.8107	1.64113	11.9666	8.73106
2096	60.3694	59.9635	59.6372	17.6794	25.3524	2.70459	1.62563	11.9371	8.70354
2095	60.3658	60.0171	59.6925	17.6058	25.3687	2.75224	1.57816	11.9673	8.76129
2094	60.362	60.0696	59.7077	17.5467	25.3108	2.81698	1.59359	12.0339	8.72042
2093	60.3969	60.1087	59.6804	17.6699	25.3293	2.80768	1.56246	11.9525	8.69609
2092	60.3739	60.0324	59.6004	17.6777	25.3233	2.80309	1.53614	11.8214	8.8403
2091	60.391	60.0348	59.6005	17.6339	25.3569	2.76507	1.49274	11.7023	8.6847
2090	60.4595	60.0663	59.6861	17.6306	25.3714	2.72996	1.57947	11.8044	8.54231
2089	60.4312	60.0714	59.6543	17.6341	25.2545	2.75474	1.66028	11.9436	8.57586
2088	60.3912	60.0287	59.6571	17.6489	25.2832	2.74034	1.53872	11.9377	8.68189
2087	60.4158	60.0692	59.69	17.4862	25.3463	2.73817	1.52191	11.8392	8.71921
2086	60.4452	60.0787	59.6377	17.4569	25.2574	2.7404	1.52497	11.7579	8.69826
2085	60.4108	60.0055	59.6123	17.5205	25.2367	2.68365	1.46559	11.7564	8.72792
2084	60.4452	60.0052	59.6244	17.5308	25.3632	2.70308	1.5581	11.6435	8.68277
2083	60.4183	60.0306	59.5898	17.4824	25.3335	2.7266	1.49876	11.6903	8.67319
2082	60.3729	59.9585	59.5201	17.4578	25.27	2.73677	1.52075	11.7787	8.70302
2081	60.3316	59.9119	59.4921	17.4283	25.3374	2.66766	1.62506	11.6836	8.69629
2080	60.3309	59.9847	59.5807	17.41	25.3021	2.71651	1.56386	11.6096	8.66685
2079	60.4391	59.9687	59.6012	17.4229	25.2782	2.69594	1.49176	11.6297	8.52253
2078	60.4966	59.9651	59.5041	17.4207	25.2166	2.65662	1.56901	11.6541	8.46639
2077	60.4424	59.9986	59.5369	17.4139	25.2014	2.68111	1.63702	11.6433	8.52957
2076	60.4183	60.0115	59.6243	17.4257	25.2235	2.70492	1.58923	11.6235	8.52647
2075	60.4875	60.008	59.5604	17.3732	25.2021	2.69238	1.54853	11.6433	8.46596
2074	60.4723	59.9907	59.5308	17.349	25.2592	2.64692	1.49338	11.6502	8.4973
2073	60.3671	59.9285	59.5089	17.3721	25.2452	2.66972	1.46482	11.6108	8.54369
2072	60.3824	59.9169	59.4463	17.326	25.1782	2.66101	1.51103	11.5703	8.56678
2071	60.3949	59.9319	59.4694	17.3098	25.2174	2.56344	1.50886	11.584	8.48728
2070	60.3958	59.96	59.5388	17.2716	25.227	2.57303	1.51879	11.5449	8.35985
2069	60.4514	59.9564	59.5272	17.2886	25.2298	2.58227	1.51665	11.5061	8.43253
2068	60.4136	59.9189	59.507	17.2367	25.196	2.60833	1.49276	11.499	8.49244
2067	60.4313	59.8639	59.5091	17.1332	25.101	2.71138	1.47784	11.493	8.46031
2066	60.509	59.894	59.5127	17.1677	25.1285	2.67596	1.50031	11.4666	8.41119
2065	60.5083	59.985	59.5856	17.2299	25.1805	2.5199	1.43465	11.4112	8.43544
2064	60.4475	59.9136	59.5619	17.2234	25.2022	2.55473	1.45268	11.412	8.50672
2063	60.457	59.8831	59.5336	17.1965	25.1948	2.65411	1.54592	11.5264	8.49268
2062	60.4692	59.9845	59.5952	17.2475	25.1862	2.70127	1.6057	11.5377	8.51418
2061	60.5216	59.969	59.5851	17.2878	25.3036	2.75266	1.68066	11.4903	8.55654
2060	60.5289	59.9557	59.5012	17.3171	25.3415	2.7959	1.76628	11.5626	8.5437
2059	60.5103	60.0292	59.489	17.2869	25.3485	2.81346	1.74264	11.5947	8.5558
2058	60.4864	60.0206	59.5718	17.23	25.3719	2.73233	1.59758	11.6005	8.4998
2057	60.5405	59.9869	59.6089	17.2326	25.2995	2.637	1.54872	11.5086	8.37173
2056	60.6277	59.9825	59.5885	17.203	25.3003	2.60074	1.64678	11.4407	8.35896
2055	60.6124	59.9471	59.5599	17.0921	25.2814	2.67711	1.6072	11.4473	8.35001
2054	60.5974	59.9457	59.6005	17.0774	25.2067	2.66002	1.58544	11.4418	8.33635
2053	60.5514	59.934	59.5977	17.0769	25.2059	2.67021	1.60582	11.4788	8.38717
2052	60.5195	59.9337	59.5599	17.0314	25.2537	2.67736	1.56201	11.4476	8.35484
2051	60.5572	59.9767	59.5857	17.0391	25.1965	2.6528	1.60533	11.4026	8.34653
2050	60.4678	59.9853	59.557	17.0949	25.1943	2.63753	1.51426	11.3858	8.27274
2049	60.4822	59.9102	59.4991	17.082	25.2698	2.64046	1.4612	11.3539	8.28981
2048	60.5146	59.9469	59.5443	17.067	25.2608	2.73813	1.49709	11.3367	8.31133
2047	60.5216	59.9544	59.5759	17.0073	25.2249	2.6886	1.5779	11.3343	8.31653
2046	60.4875	59.9283	59.4903	16.9594	25.2089	2.60189	1.5766	11.378	8.28945
2045	60.5441	59.9842	59.5319	16.9603	25.2425	2.698	1.55904	11.3164	8.2065
2044	60.543	59.9557	59.5521	17.0049	25.1946	2.61984	1.51246	11.2638	8.27957
2043	60.5185	59.9236	59.5289	16.915	25.1463	2.55892	1.53055	11.2665	8.20871
2042	60.4762	59.9213	59.5485	16.9281	25.2359	2.65206	1.55091	11.305	8.21054
2041	60.4807	59.8981	59.5229	16.974	25.159	2.65464	1.44062	11.2152	8.16254
2040	60.5205	59.8569	59.5179	16.9391	25.0412	2.61215	1.53046	11.218	8.15487
2039	60.5436	59.8765	59.5418	16.844	25.1772	2.56518	1.57383	11.2581	8.12817
2038	60.5049	59.9215	59.546	16.8358	25.149	2.58708	1.54666	11.2554	8.15169
2037	60.5439	59.9711	59.4947	16.839	25.1829	2.61583	1.52386	11.265	8.18055
2036	60.5157	59.9376	59.5058	16.8607	25.1446	2.59578	1.49633	11.2521	8.18231
2035	60.5611	59.9163	59.5271	16.8101	25.1015	2.5634	1.55667	11.1773	8.08161
2034	60.5382	59.9004	59.473	16.7813	25.0791	2.59227	1.51356	11.1743	8.13892
2033	60.5064	59.951	59.439	16.7641	25.1174	2.65218	1.59643	11.1864	8.1297
2032	60.5709	59.9136	59.5288	16.6927	25.1593	2.5521	1.5555	11.2032	8.04404
2031	60.6213	59.8349	59.5195	16.653	25.1351	2.58246	1.49654	11.0795	8.08719
2030	60.5895	59.9478	59.4507	16.7102	25.2071	2.64552	1.4612	11.1609	8.10423
2029	60.5549	59.9452	59.4778	16.7036	25.1459	2.5629	1.40765	11.214	8.06264
2028	60.6806	59.9972	59.5107	16.6174	25.1049	2.45243	1.44062	11.1176	8.02824
2027	60.5966	59.8607	59.4384	16.5753	25.0979	2.48775	1.50001	11.1009	7.92599
2026	60.5686	59.7858	59.5011	16.675	25.0538	2.61209	1.48166	11.0986	8.03409
2025	60.5512	59.8401	59.508	16.6812	25.0405	2.59832	1.57887	11.094	8.05802
2024	60.5994	59.845	59.4843	16.6441	25.0425	2.55989	1.51108	11.0629	7.96453
2023	60.5795	59.9419	59.4694	16.6018	25.0474	2.62412	1.46898	11.0879	7.9122
2022	60.6479	59.9262	59.4302	16.5018	25.0541	2.58448	1.46698	11.0454	7.93319
2021	60.6538	59.9069	59.4402	16.4762	25.0613	2.54967	1.46149	11.0503	7.95039
2020	60.603	59.9132	59.4004	16.5044	25.0941	2.57173	1.52556	10.9937	7.84125
2019	60.6643	59.8947	59.4873	16.5761	24.9977	2.56887	1.50225	10.9124	7.89567
2018	60.6636	59.8453	59.4568	16.5291	25.0393	2.47087	1.47061	10.9401	7.94278
2017	60.5671	59.8707	59.506	16.4562	25.0084	2.49579	1.48944	10.9936	7.89562
2016	60.6178	59.9232	59.4951	16.4971	25.0863	2.59216	1.46406	10.9887	7.82922
2015	60.664	59.8905	59.4568	16.4106	25.1013	2.47207	1.54918	10.9972	7.94428
2014	60.5981	59.7789	59.4926	16.4807	25.0987	2.4612	1.37088	10.9378	7.88864
2013	60.5862	59.8687	59.5485	16.4417	25.0477	2.5662	1.45833	10.9739	7.78943
2012	60.6107	59.8262	59.4753	16.3454	25.0619	2.6255	1.45649	10.9272	7.8281
2011	60.6819	59.8717	59.4356	16.3394	25.0182	2.54074	1.40683	10.893	7.83684
2010	60.6441	59.8805	59.4635	16.3733	25.0291	2.46525	1.44267	10.9136	7.80848
2009	60.5946	59.7839	59.4323	16.3427	24.9732	2.45241	1.42528	10.9672	7.74921
2008	60.7133	59.8824	59.4673	16.329	25.0157	2.4627	1.50269	10.9597	7.74508
2007	60.6905	59.9141	59.4667	16.3083	25.0874	2.48018	1.40274	10.8511	7.74245
2006	60.6812	59.9006	59.4834	16.2393	25.0555	2.44471	1.48462	10.7667	7.70808
2005	60.7269	59.8589	59.4755	16.335	24.9957	2.39913	1.43285	10.7566	7.69147
2004	60.728	59.843	59.4206	16.3481	24.98	2.4876	1.37606	10.7163	7.7088
2003	60.7045	59.8117	59.5086	16.2785	24.9998	2.46467	1.60412	10.7811	7.6871
2002	60.6543	59.8791	59.4098	16.306	24.9942	2.4635	1.49881	10.8179	7.68701
2001	60.7435	59.9492	59.4891	16.1347	25.0075	2.46194	1.37068	10.8168	7.68623
2000	60.6939	59.9122	59.4931	16.1019	24.9736	2.40311	1.36152	10.7782	7.73385
1999	60.6902	59.8669	59.4838	16.0644	24.9417	2.36084	1.36777	10.7167	7.72028
1998	60.7263	59.8777	59.5642	16.2244	24.9003	2.38464	1.42664	10.7435	7.78789
1997	60.6591	59.878	59.487	16.1909	24.9519	2.47305	1.36599	10.6768	7.56809
1996	60.7054	59.8311	59.4442	16.1269	24.9369	2.46655	1.34253	10.7392	7.61558
1995	60.7103	59.9061	59.4627	16.1043	25.0162	2.38457	1.34809	10.7159	7.57037
1994	60.708	59.8551	59.4743	16.1317	24.8831	2.47486	1.34902	10.6727	7.6946
1993	60.7748	59.8535	59.4066	16.1411	24.878	2.38721	1.45656	10.7165	7.65234
1992	60.7621	59.8884	59.3997	16.1288	24.9018	2.38536	1.40846	10.7345	7.63762
1991	60.6385	59.8009	59.3792	16.0853	24.862	2.38897	1.3956	10.6234	7.6595
1990	60.683	59.8383	59.2817	16.0255	24.9146	2.33587	1.31353	10.6634	7.62372
1989	60.7003	59.9334	59.3473	16.0542	24.9169	2.4544	1.41782	10.6527	7.59935
1988	60.7542	59.8523	59.4357	15.9919	24.9321	2.40278	1.39715	10.5241	7.51344
1987	60.7877	59.8094	59.4065	15.9332	24.9266	2.43041	1.31365	10.5845	7.51489
1986	60.7492	59.781	59.3613	15.9275	24.8813	2.3523	1.48062	10.6165	7.49626
1985	60.7571	59.7935	59.3505	15.9537	24.8186	2.39857	1.35362	10.6466	7.44174
1984	60.7448	59.8714	59.3705	15.8864	24.8887	2.41258	1.33841	10.597	7.54402
1983	60.8923	59.9328	59.4496	15.8582	24.8144	2.34801	1.43107	10.5709	7.60676
1982	60.8013	59.922	59.3787	15.882	24.8867	2.41879	1.41762	10.5673	7.54637
1981	60.8564	59.904	59.4673	15.9561	24.9066	2.42997	1.40914	10.5402	7.57339
1980	60.9136	59.9028	59.4735	15.881	24.8261	2.49257	1.43382	10.6183	7.48823
1979	60.791	59.8293	59.3725	15.7696	24.7691	2.29349	1.40814	10.5547	7.45928
1978	60.761	59.7985	59.3702	15.8218	24.8177	2.26654	1.41416	10.4629	7.50278
1977	60.7968	59.7968	59.4452	15.8878	24.7178	2.31531	1.35683	10.529	7.39623
1976	60.8187	59.8569	59.4485	15.7742	24.8346	2.40058	1.37562	10.4944	7.43229
1975	60.7557	59.8128	59.4506	15.8144	24.8301	2.36598	1.41308	10.3715	7.35871
1974	60.8291	59.7934	59.4576	15.7479	24.7977	2.16729	1.394	10.3979	7.37787
1973	60.9332	59.9002	59.4581	15.6872	24.7418	2.20344	1.44154	10.4504	7.46504
1972	60.7781	59.8747	59.4541	15.6896	24.7641	2.26057	1.32477	10.497	7.48869
1971	60.869	59.9264	59.4742	15.7378	24.7264	2.39036	1.32078	10.413	7.3988
1970	60.8814	59.889	59.4659	15.7945	24.7868	2.39043	1.4693	10.4215	7.3452
1969	60.9029	59.8668	59.4367	15.7306	24.7251	2.37716	1.31575	10.4242	7.42919
1968	60.9001	59.8114	59.46	15.7213	24.7187	2.39537	1.33279	10.3899	7.40959
1967	60.8405	59.8329	59.3279	15.6474	24.7707	2.29111	1.33982	10.246	7.32302
1966	60.9496	59.9598	59.53	15.7192	24.6209	2.35821	1.29099	10.3067	7.36242
1965	60.9029	59.8483	59.3763	15.5678	24.7086	2.27503	1.3662	10.3589	7.39447
1964	60.8931	59.819	59.43	15.5264	24.7763	2.25746	1.43274	10.3744	7.38827
1963	60.8148	59.9039	59.4516	15.7138	24.7867	2.27013	1.47043	10.2846	7.2821
1962	60.8659	59.8193	59.4072	15.7346	24.7658	2.26935	1.38811	10.2987	7.36611
1961	60.9879	59.9358	59.4335	15.4822	24.8061	2.23866	1.44356	10.2713	7.1852
1960	60.8494	59.8396	59.4745	15.5345	24.7303	2.30202	1.3699	10.2788	7.30727
1959	60.91	59.9119	59.3258	15.5863	24.554	2.24399	1.35513	10.2104	7.28178
1958	60.8201	59.8738	59.3078	15.4394	24.6758	2.35756	1.29425	10.1262	7.05233
1957	60.9493	59.9087	59.5668	15.4756	24.7137	2.28752	1.29411	10.2206	7.25963
1956	60.8865	59.865	59.3982	15.3701	24.7339	2.23853	1.37473	10.2524	7.07587
1955	60.9264	59.9506	59.3532	15.4978	24.6758	2.24487	1.27007	10.1629	7.26521
1954	60.9076	59.815	59.4407	15.5426	24.6877	2.19845	1.29447	10.247	7.30846
1953	60.9455	59.8574	59.4701	15.3718	24.6861	2.29794	1.29133	10.2295	7.24971
1952	60.896	59.79	59.4639	15.3375	24.7261	2.16211	1.3879	10.2351	7.21207
1951	60.9752	59.8796	59.3642	15.3554	24.6497	2.14731	1.37628	10.1169	7.18313
1950	60.8781	59.7768	59.3738	15.3057	24.7075	2.28984	1.33307	10.0922	7.07429
1949	61.0469	59.9416	59.5532	15.2611	24.8365	2.26131	1.16214	10.1494	7.14453
1948	60.933	59.8468	59.4274	15.3877	24.6513	2.15857	1.28904	10.1366	7.17051
1947	61.0506	59.8696	59.4654	15.3268	24.6433	2.15847	1.3817	10.0209	7.1788
1946	61.0931	60.0058	59.3897	15.2775	24.6413	2.21571	1.01443	10.1325	7.09801
1945	60.9945	59.8499	59.4724	15.3571	24.6152	2.18526	1.36828	10.0134	7.06902
1944	61.0771	59.8032	59.3016	15.2332	24.627	2.14961	1.28817	10.0939	7.07204
1943	61.0589	59.9075	59.3633	15.2373	24.5486	2.11943	1.34418	9.9412	7.04012
1942	60.9278	59.8718	59.4515	15.2619	24.6139	2.27326	1.32722	10.0269	7.0148
1941	61.1268	60.0004	59.4678	15.1859	24.6518	2.17827	1.30045	9.93093	7.07702
1940	61.1406	59.892	59.3776	15.287	24.6368	2.22609	1.26691	10.0358	7.08613
1939	61.1118	59.8701	59.3993	15.2256	24.6218	2.15914	1.29264	10.1447	7.07512
1938	61.0233	59.9151	59.5491	15.2207	24.5511	2.1231	1.23922	10.0414	7.07978
1937	60.9866	59.7873	59.4663	15.1431	24.5875	2.15002	1.17013	9.88153	6.96897
1936	61.0671	59.8417	59.5081	15.1044	24.5092	2.26299	1.21715	9.81965	7.06627
1935	61.0683	59.8224	59.4288	15.249	24.5949	2.16052	1.42427	9.98858	6.93251
1934	61.0643	59.9045	59.3982	15.0649	24.5432	2.31444	1.30611	9.84804	6.8884
1933	61.0819	59.8967	59.3648	15.081	24.4872	2.20867	1.28925	9.78293	7.0388
1932	61.101	59.8983	59.3686	15.0569	24.6673	1.94398	1.28404	9.92479	7.00743
1931	61.1228	59.9244	59.4233	15.0212	24.4781	2.19706	1.19408	9.89142	7.0152
1930	60.9136	59.8336	59.3898	15.0429	24.5147	2.09442	1.1678	9.87058	6.94137
1929	61.0853	59.9573	59.4541	14.9802	24.584	2.12696	1.142	9.78787	7.0125
1928	61.0746	59.7671	59.3618	15.1112	24.4821	2.10489	1.21243	9.78488	7.07688
1927	61.0919	59.8578	59.505	14.9592	24.3571	2.0115	1.22574	9.70909	6.78071
1926	61.0218	59.884	59.452	14.9238	24.4025	2.18314	1.22871	9.74297	6.98947
1925	61.0892	59.7989	59.3324	14.9032	24.4862	2.13138	1.32417	9.7042	7.06468
1924	61.1594	59.7301	59.4267	14.9006	24.3734	2.12636	1.23814	9.82301	6.85464
1923	61.1038	59.8472	59.4777	14.8285	24.4068	2.10008	1.21962	9.56711	6.98628
1922	61.1962	59.898	59.3503	14.9345	24.4926	2.09632	1.207	9.68248	6.98039
1921	61.1223	59.8486	59.3744	14.9682	24.4441	2.16644	1.23552	9.55925	7.0389
1920	61.0893	59.8348	59.3022	14.8224	24.4479	2.03154	1.25237	9.78419	7.03508
1919	61.1522	59.8746	59.4747	14.8444	24.3979	2.15183	1.2166	9.56968	6.93801
1918	61.1489	59.8782	59.4351	14.9234	24.3478	2.08907	1.24419	9.5836	6.92924
1917	61.098	59.8379	59.3145	14.7991	24.3375	2.05208	1.25312	9.54896	6.77849
1916	61.1131	59.9383	59.3317	14.817	24.3207	2.02823	1.23665	9.5042	6.95242
1915	61.1937	59.828	59.3518	14.7997	24.28	2.00583	1.19796	9.53074	7.00733
1914	61.1597	59.7615	59.3327	14.7274	24.4186	2.01961	1.17412	9.52349	6.93488
1913	61.067	59.6825	59.2318	14.7625	24.3193	2.00123	1.05851	9.54215	6.92146
1912	61.0599	59.7929	59.3174	14.7268	24.3112	1.9765	1.18956	9.51132	6.88103
1911	61.2243	59.7518	59.3024	14.7462	24.2854	1.93572	1.20375	9.40647	6.9135
1910	61.0489	59.7591	59.2683	14.6604	24.3158	2.01293	1.2943	9.38463	6.86502
1909	61.2319	59.8855	59.2905	14.727	24.3534	2.06033	1.10122	9.50449	6.80633
1908	61.2117	59.859	59.4031	14.5929	24.2163	2.14495	1.16929	9.555	6.92569
1907	61.2331	59.8338	59.382	14.7771	24.4111	1.96476	1.18586	9.5189	6.90078
1906	61.3208	59.8039	59.3446	14.6635	24.338	2.0435	1.18878	9.37802	6.80786
1905	61.209	59.8535	59.3276	14.7017	24.3463	1.99296	1.18154	9.42046	6.84418
1904	61.0872	59.9343	59.3423	14.6088	24.2608	2.02518	1.16905	9.47443	6.93927
1903	61.2995	59.873	59.311	14.6002	24.2377	1.93486	1.2486	9.34431	6.83211
1902	61.2204	59.7798	59.3391	14.5265	24.2269	2.0584	1.2217	9.32578	6.75307
1901	61.2463	59.8529	59.4133	14.5903	24.3608	1.97383	1.2883	9.26117	6.83708
1900	61.2418	59.8796	59.3898	14.5238	24.2945	2.0472	1.18859	9.26911	6.85369
1899	61.2676	59.9252	59.4013	14.459	24.2799	1.94321	1.16317	9.32032	6.79951
1898	61.2967	59.8521	59.3807	14.5447	24.2566	2.06372	1.15253	9.32374	6.83446
1897	61.2885	59.8383	59.3842	14.4763	24.2522	2.04755	1.25769	9.19281	6.7206
1896	61.3673	59.8387	59.4287	14.4725	24.2296	1.97843	1.16554	9.30811	6.84214
1895	61.3296	59.8275	59.4303	14.3685	24.1941	1.99042	1.1548	9.34177	6.72797
1894	61.2766	59.8943	59.3316	14.4244	24.2458	1.90758	1.2126	9.34208	6.904
1893	61.2976	59.8051	59.3408	14.4015	24.1978	1.93114	1.20495	9.36463	6.66218
1892	61.3573	59.8796	59.4449	14.3451	24.1856	1.9816	1.14766	9.37859	6.67233
1891	61.4225	59.9136	59.3807	14.4714	24.2705	1.99523	1.08685	9.16358	6.67362
1890	61.3621	59.9078	59.3895	14.2173	24.1429	1.99524	1.04392	9.10563	6.81013
1889	61.3644	59.9271	59.4674	14.2853	24.1324	2.13556	1.18709	9.22561	6.69047
1888	61.3832	59.8912	59.4086	14.4497	24.2216	2.00033	1.2273	9.22212	6.6225
1887	61.3989	59.8779	59.4494	14.3078	24.3028	1.91627	1.16927	9.14804	6.58983
1886	61.4213	59.9367	59.4272	14.274	24.2362	1.86807	1.14351	9.17071	6.635
1885	61.463	59.887	59.5034	14.3292	24.1836	2.01006	1.13825	9.22307	6.71163
1884	61.4869	59.8707	59.4784	14.3166	24.1655	1.91068	1.17671	9.17856	6.55594
1883	61.3699	59.8535	59.397	14.2715	24.1615	1.86559	1.21196	9.07241	6.62577
1882	61.4783	59.9954	59.4355	14.1726	24.2465	1.84743	1.07065	9.13327	6.65761
1881	61.4574	59.9192	59.4273	14.2943	24.2011	1.90101	1.13784	9.15955	6.58932
1880	61.4598	59.8751	59.3523	14.3232	24.0638	2.06609	1.19585	9.18352	6.61912
1879	61.4761	59.8737	59.4041	14.1739	24.2075	1.91161	1.12205	9.1612	6.63576
1878	61.5591	59.9723	59.4541	14.1829	24.0632	1.95955	1.09209	9.10806	6.50715
1877	61.5259	60.0039	59.4856	14.0658	24.2014	1.99892	1.11843	9.10653	6.58077
1876	61.516	59.9555	59.4604	14.0582	24.1878	1.96731	1.09461	9.14493	6.56148
1875	61.4539	59.979	59.3868	14.0404	24.0582	1.92252	1.12173	9.11035	6.53373
1874	61.4936	59.9001	59.3816	14.0756	24.0925	1.9363	1.01446	9.09064	6.48019
1873	61.5117	59.9537	59.3814	14.1105	24.057	1.97283	1.14045	9.0514	6.64619
1872	61.5701	59.9523	59.4637	14.1045	24.0614	1.92242	1.13543	8.89755	6.60599
1871	61.527	59.9237	59.3705	14.0826	24.0117	1.93301	1.10273	8.92824	6.49505
1870	61.516	59.9064	59.3806	13.996	23.9882	1.80233	1.11924	8.94783	6.49926
1869	61.4648	59.8121	59.2368	13.9842	23.9301	1.82276	1.00811	8.77233	6.50014
1868	61.4496	59.8712	59.2949	13.879	23.9643	1.80474	0.944037	8.90636	6.46099
1867	61.6	59.9131	59.4196	13.9258	23.9318	1.83252	1.04631	8.87796	6.38567
1866	61.4851	59.8924	59.4157	13.9128	23.9555	1.84463	1.01513	8.91345	6.58682
1865	61.5484	59.952	59.3928	13.9443	24.0426	1.94703	1.1183	8.90449	6.51547
1864	61.5157	59.9007	59.3842	13.9701	23.9741	1.89953	1.02949	8.87041	6.57021
1863	61.6298	59.9345	59.4857	13.9249	23.9855	1.77148	1.08591	8.83231	6.49122
1862	61.7093	59.9597	59.4249	13.8331	24.0043	1.76292	1.15807	8.92985	6.38214
1861	61.6655	59.8967	59.4427	13.8368	23.9353	1.82638	1.13504	8.84411	6.42411
1860	61.6174	59.9224	59.5219	13.8426	23.9535	1.78434	1.09253	8.99116	6.40946
1859	61.6787	60.0549	59.5178	13.8749	23.9569	1.81637	1.10305	8.76623	6.39773
1858	61.6299	60.0194	59.4857	13.8881	23.9861	1.8286	1.07578	8.74871	6.38097
1857	61.6492	59.9496	59.4922	13.8032	23.9774	1.84977	1.00859	8.80108	6.3553
1856	61.6169	59.97	59.465	13.8126	23.9813	1.88458	1.07162	8.79985	6.32745
1855	61.6412	60.0331	59.5138	13.7371	23.9202	1.7773	1.12662	8.76289	6.3536
1854	61.6867	60.0417	59.4707	13.7781	24.0051	1.81924	1.02496	8.79723	6.34402
1853	61.7109	60.0201	59.5006	13.7551	23.8999	1.94542	1.04544	8.74392	6.43475
1852	61.757	59.9958	59.511	13.7053	23.8252	1.86651	1.12264	8.73885	6.38403
1851	61.7685	60.0597	59.4882	13.7426	23.899	1.95793	1.14544	8.83382	6.32712
1850	61.7181	60.044	59.5183	13.7137	23.8195	1.81253	1.02355	8.8319	6.28187
1849	61.7913	59.9671	59.4515	13.7018	23.8664	1.78143	1.04915	8.71565	6.24773
1848	61.7821	60.0164	59.4806	13.6449	23.8696	1.68307	1.15397	8.65724	6.30877
1847	61.7519	60.0499	59.5235	13.6373	23.8549	1.79416	1.15454	8.64354	6.3242
1846	61.7323	60.0362	59.4742	13.6214	23.7224	1.87262	1.04673	8.66109	6.32571
1845	61.8466	60.0033	59.4167	13.6388	23.846	1.79827	0.967322	8.65979	6.27769
1844	61.7467	60.0175	59.3899	13.5571	23.7693	1.76982	0.944921	8.62348	6.28251
1843	61.7705	60.0535	59.4555	13.4815	23.7359	1.76599	0.966155	8.62996	6.25322
1842	61.8355	60.0348	59.521	13.587	23.8032	1.78443	1.10802	8.64164	6.22752
1841	61.8478	60.019	59.5265	13.5556	23.8705	1.73479	1.0599	8.65091	6.21023
1840	61.8064	59.9947	59.4705	13.4396	23.8029	1.73995	1.03605	8.6056	6.2536
1839	61.7394	59.9963	59.4343	13.4944	23.759	1.88464	1.03726	8.52972	6.26596
1838	61.7987	59.9421	59.4942	13.4963	23.7031	1.74751	1.0568	8.57336	6.19262
1837	61.8675	59.9791	59.5068	13.3958	23.6786	1.72237	0.942645	8.63386	6.1501
1836	61.8598	60.097	59.5085	13.434	23.7224	1.67212	0.95072	8.56574	6.18509
1835	61.8623	60.0666	59.4812	13.4635	23.7342	1.74598	1.01678	8.45168	6.18968
1834	61.8597	60.0233	59.4907	13.3516	23.6598	1.8044	1.03017	8.43382	6.18085
1833	61.7535	60.009	59.3808	13.38	23.6394	1.73009	0.999491	8.48951	6.16086
1832	61.8376	60.0513	59.4753	13.3823	23.7002	1.695	1.02593	8.44674	6.14168
1831	61.9009	60.0416	59.5834	13.3795	23.6496	1.71273	1.05779	8.46271	6.10467
1830	62.0036	60.0793	59.5946	13.3359	23.7319	1.74359	0.975401	8.46094	6.14896
1829	61.9349	60.0116	59.5268	13.3568	23.6653	1.69819	0.922237	8.45272	6.25741
1828	61.8904	60.0557	59.5627	13.2983	23.6101	1.77651	0.972595	8.44751	6.12168
1827	61.942	60.1144	59.6207	13.2948	23.6718	1.70137	1.07157	8.43727	6.15733
1826	61.9461	60.1293	59.5575	13.3053	23.6443	1.77542	1.00745	8.46093	6.11182
1825	61.9294	60.0548	59.5239	13.2941	23.639	1.67978	1.01302	8.46624	6.11821
1824	61.9697	60.0705	59.5924	13.2644	23.6013	1.69774	1.05774	8.46329	6.07346
1823	62.0199	60.0802	59.5947	13.2367	23.5221	1.78223	1.04282	8.40054	6.13383
1822	62.0144	60.0505	59.5234	13.185	23.5785	1.73681	0.997479	8.31794	6.14842
1821	62.0056	60.0329	59.5318	13.152	23.6684	1.70765	1.03965	8.30176	6.13396
1820	62.001	60.0442	59.5121	13.1399	23.6362	1.65947	0.950414	8.37083	6.03686
1819	61.9719	60.0886	59.4897	13.0684	23.5072	1.57395	0.914076	8.36249	6.08244
1818	61.9243	60.0907	59.5283	13.1006	23.5155	1.58301	1.02993	8.35365	6.09195
1817	62.023	60.1128	59.5473	13.1261	23.591	1.676	1.05504	8.35454	6.10612
1816	62.0717	60.1022	59.5522	13.0468	23.5228	1.68668	1.04668	8.3612	6.08799
1815	62.0474	60.1248	59.5999	13.0606	23.4094	1.60948	1.01181	8.31301	6.06815
1814	62.1521	60.1713	59.627	13.0931	23.3904	1.73729	0.945854	8.24891	6.04142
1813	62.1528	60.0973	59.6023	13.0992	23.4886	1.75245	0.987359	8.18363	5.99221
1812	62.075	60.1306	59.6096	13.0326	23.5632	1.66095	0.878957	8.26036	6.02301
1811	62.0783	60.1803	59.5596	13.0615	23.5143	1.75801	0.879423	8.23711	5.99884
1810	62.1977	60.1474	59.5867	13.0533	23.5634	1.76574	0.974389	8.18806	5.98331
1809	62.1798	60.1105	59.5819	12.9804	23.5463	1.62871	1.04185	8.26971	5.92225
1808	62.119	60.1088	59.5212	12.9794	23.4321	1.55631	0.922663	8.27457	5.94098
1807	62.1965	60.205	59.5687	12.9479	23.3712	1.67684	0.897944	8.23012	5.98883
1806	62.2381	60.213	59.6418	12.8536	23.341	1.67943	1.05151	8.22184	5.91885
1805	62.2784	60.1889	59.6688	12.8924	23.3823	1.54601	0.996218	8.19806	5.87284
1804	62.2364	60.195	59.5897	12.8446	23.4375	1.54411	0.900404	8.15547	5.90164
1803	62.2384	60.2009	59.5849	12.8793	23.427	1.55824	0.936092	8.16886	5.9073
1802	62.2958	60.2547	59.69	12.9588	23.4799	1.55329	0.964462	8.15636	5.96239
1801	62.3185	60.194	59.7265	12.8837	23.4425	1.64602	1.02605	8.16627	5.94055
1800	62.3177	60.2039	59.6306	12.8103	23.3645	1.69193	1.03287	8.1641	5.86367
1799	62.2928	60.2358	59.6509	12.7593	23.3414	1.62519	1.05385	8.0927	5.84634
1798	62.3055	60.2433	59.7093	12.7511	23.319	1.5998	1.02738	8.08276	5.78612
1797	62.3811	60.2494	59.7748	12.773	23.3651	1.57124	0.922766	8.05984	5.83986
1796	62.3631	60.2723	59.7833	12.7596	23.3516	1.59273	0.911323	7.97078	5.89995
1795	62.3663	60.2687	59.7254	12.7229	23.2567	1.60926	0.976292	8.07977	5.84922
1794	62.4018	60.2392	59.6555	12.7721	23.3266	1.60851	0.987653	8.10262	5.83552
1793	62.3862	60.2597	59.6796	12.7745	23.3721	1.61249	0.884715	8.05158	5.90054
1792	62.3925	60.2928	59.7706	12.6821	23.34	1.53854	0.859866	8.04914	5.85522
1791	62.3402	60.2282	59.7213	12.6189	23.3333	1.5539	0.964112	7.99758	5.8074
1790	62.3695	60.2195	59.7055	12.6445	23.322	1.61179	0.975643	8.09539	5.88429
1789	62.5282	60.2427	59.7802	12.6795	23.3027	1.62985	0.944863	8.08329	5.86411
1788	62.5865	60.2668	59.7522	12.6346	23.2894	1.67134	0.967714	7.99253	5.81055
1787	62.5859	60.385	59.7554	12.6152	23.2967	1.64718	0.96963	7.96787	5.7894
1786	62.5534	60.4125	59.8373	12.5271	23.2486	1.61728	1.02113	7.92478	5.83177
1785	62.487	60.3167	59.7462	12.524	23.1949	1.58667	1.00333	7.94013	5.7562
1784	62.5116	60.2966	59.6891	12.665	23.2059	1.53621	0.896295	7.90489	5.71512
1783	62.5278	60.3178	59.777	12.5577	23.11	1.57694	0.815365	7.97761	5.81496
1782	62.5136	60.2702	59.7413	12.4747	23.1286	1.52669	0.878281	7.95575	5.72989
1781	62.4871	60.2472	59.693	12.5684	23.1959	1.44279	0.938188	7.89621	5.69383
1780	62.5535	60.3103	59.771	12.5127	23.1423	1.50743	0.935033	7.93599	5.75249
1779	62.6741	60.4069	59.865	12.4024	23.21	1.60478	0.905771	7.87611	5.69357
1778	62.5869	60.3306	59.8225	12.4066	23.1833	1.61797	0.934361	7.85841	5.67864
1777	62.5851	60.3091	59.7646	12.3807	23.0775	1.55669	0.929537	7.88035	5.70607
1776	62.6375	60.3934	59.795	12.4704	23.167	1.56522	0.892524	7.87625	5.62562
1775	62.6506	60.3986	59.852	12.4778	23.1387	1.6002	0.876358	7.86928	5.64767
1774	62.6964	60.4145	59.8598	12.3723	23.1205	1.52683	0.867233	7.83092	5.65555
1773	62.6539	60.3817	59.8068	12.3543	23.1756	1.49751	0.912176	7.7846	5.57436
1772	62.6768	60.4063	59.7728	12.3832	23.1199	1.50116	0.936934	7.79449	5.63471
1771	62.6525	60.3945	59.7344	12.3927	22.9866	1.53942	0.895463	7.75247	5.66275
1770	62.635	60.3324	59.755	12.3689	22.9913	1.56938	0.837386	7.69405	5.56038
1769	62.7475	60.3554	59.8168	12.33	23.024	1.50329	0.888839	7.74188	5.54807
1768	62.8003	60.4441	59.884	12.3227	23.0115	1.4448	0.964346	7.74765	5.59449
1767	62.8222	60.4664	59.9559	12.2636	22.9802	1.41027	0.881387	7.67454	5.60719
1766	62.7488	60.4492	59.9067	12.1542	23.0479	1.47248	0.844164	7.71301	5.52798
1765	62.7141	60.4451	59.856	12.1962	23.0841	1.50053	0.901524	7.71875	5.49769
1764	62.7861	60.4825	59.8324	12.2654	22.9481	1.48684	0.85609	7.69049	5.56956
1763	62.8432	60.4528	59.8492	12.2487	22.9184	1.55313	0.819429	7.72521	5.5983
1762	62.9217	60.4439	59.8703	12.1737	22.9897	1.47199	0.947011	7.652	5.44922
1761	62.8969	60.4151	59.8388	12.129	22.9924	1.47544	0.924706	7.6139	5.47235
1760	62.8686	60.4801	59.9031	12.1679	23.0043	1.38526	0.838623	7.61924	5.58943
1759	62.8539	60.5398	59.9135	12.1934	22.996	1.43909	0.788919	7.67201	5.58767
1758	62.852	60.5201	59.8537	12.1895	22.9246	1.53104	0.847613	7.63548	5.60761
1757	62.8562	60.4464	59.8776	12.1478	22.9448	1.46101	0.84791	7.56206	5.63858
1756	62.8909	60.4877	59.9179	12.1142	22.9253	1.4046	0.891487	7.5822	5.52956
1755	63.0002	60.5053	59.889	12.0549	22.9112	1.46459	0.975771	7.5778	5.43199
1754	62.9802	60.4063	59.8453	12.0094	22.8049	1.46615	0.921931	7.47678	5.6081
1753	62.9385	60.4632	59.8721	12.0156	22.8673	1.36387	0.939494	7.4466	5.51239
1752	62.9411	60.5078	59.8754	12.0519	22.83	1.39281	0.897374	7.505	5.35645
1751	63.0378	60.5643	59.9782	12.0458	22.8028	1.49326	0.832715	7.55874	5.46004
1750	63.0798	60.5554	60.0231	11.9707	22.8116	1.44478	0.846001	7.47651	5.46965
1749	63.0858	60.5721	59.9401	11.9824	22.9135	1.5125	0.930336	7.4856	5.50324
1748	63.0557	60.6444	59.9387	11.921	22.8968	1.49904	0.838724	7.43395	5.46351
1747	63.0526	60.6276	59.9601	11.8853	22.8679	1.44446	0.718189	7.45472	5.42481
1746	63.0267	60.5597	59.9604	11.87	22.866	1.39006	0.752011	7.47001	5.45185
1745	63.0343	60.5599	59.9652	11.8269	22.8103	1.32122	0.896733	7.3993	5.36107
1744	63.1622	60.6387	60.0165	11.8957	22.776	1.39745	0.887402	7.45176	5.33361
1743	63.2216	60.6524	59.9851	11.9272	22.7394	1.3356	0.809877	7.4365	5.37542
1742	63.2016	60.6043	59.9465	11.8447	22.7277	1.36646	0.968705	7.40949	5.35074
1741	63.1495	60.6469	59.9868	11.8469	22.7267	1.47997	0.888429	7.42262	5.36355
1740	63.1852	60.6283	59.9875	11.8066	22.6532	1.4723	0.80016	7.40694	5.43427
1739	63.1494	60.6746	60.0009	11.8122	22.7137	1.3823	0.954601	7.29548	5.38702
1738	63.1412	60.5906	59.9599	11.8506	22.7215	1.3553	0.790769	7.38906	5.43931
1737	63.2113	60.6015	59.9867	11.7698	22.6473	1.38957	0.769857	7.41991	5.34137
1736	63.2128	60.6222	60.0485	11.8047	22.629	1.39708	0.869491	7.32608	5.33283
1735	63.249	60.6513	60.0167	11.836	22.6474	1.44742	0.875205	7.26074	5.26982
1734	63.262	60.6152	60.0119	11.7623	22.5895	1.38296	0.81779	7.31263	5.33171
1733	63.2352	60.6168	60.0826	11.7445	22.5956	1.31695	0.796895	7.36129	5.37927
1732	63.3017	60.6936	60.083	11.6694	22.6524	1.32264	0.863027	7.33475	5.27569
1731	63.3506	60.7348	60.1195	11.6313	22.5927	1.30505	0.823208	7.22885	5.41551
1730	63.2995	60.6762	60.0331	11.6877	22.5614	1.33709	0.826851	7.19874	5.30658
1729	63.3348	60.793	60.0852	11.5898	22.5967	1.29576	0.772607	7.20803	5.24495
1728	63.4089	60.6957	60.0313	11.598	22.5872	1.2657	0.773712	7.29508	5.31508
1727	63.4378	60.7355	60.124	11.5644	22.5743	1.42643	0.867398	7.25405	5.2422
1726	63.4521	60.7694	60.1546	11.6541	22.4686	1.34153	0.787023	7.17399	5.25314
1725	63.3899	60.7544	60.0844	11.6093	22.487	1.42636	0.80762	7.20348	5.23286
1724	63.4442	60.7452	60.1064	11.6197	22.5327	1.39783	0.762316	7.17581	5.27681
1723	63.484	60.771	60.1494	11.5331	22.4952	1.39141	0.766667	7.27019	5.24678
1722	63.4532	60.7839	60.1073	11.5874	22.4832	1.37694	0.832316	7.19842	5.21526
1721	63.5622	60.7894	60.1501	11.4839	22.4683	1.29867	0.828917	7.11158	5.26739
1720	63.5569	60.7576	60.1199	11.5146	22.4504	1.40407	0.83221	7.15823	5.18211
1719	63.4043	60.6244	60.0323	11.4643	22.4664	1.30359	0.784163	7.2316	5.19309
1718	63.5242	60.7641	60.1396	11.4259	22.5263	1.26978	0.675731	7.10187	5.15412
1717	63.4975	60.7187	60.1441	11.455	22.3717	1.21711	0.652315	7.05171	5.12227
1716	63.5276	60.7507	60.1922	11.4278	22.4312	1.33087	0.771526	7.09274	5.24907
1715	63.5894	60.797	60.2587	11.3675	22.4357	1.36188	0.758365	7.12997	5.20693
1714	63.5782	60.8307	60.1767	11.2761	22.2686	1.35744	0.797917	7.03991	5.14374
1713	63.6339	60.8237	60.2302	11.4	22.3204	1.26039	0.855084	7.12044	5.17415
1712	63.6372	60.84	60.2705	11.3234	22.4363	1.40104	0.874641	7.08918	5.18775
1711	63.5834	60.9079	60.2745	11.3962	22.3667	1.20895	0.715094	6.96473	5.08148
1710	63.6315	60.869	60.1188	11.4194	22.3498	1.36729	0.650814	7.02196	5.09645
1709	63.6636	60.8433	60.0869	11.369	22.2698	1.24563	0.749771	7.01067	5.07451
1708	63.6941	60.9324	60.2414	11.3102	22.2488	1.23604	0.724418	6.95241	5.12531
1707	63.7132	60.8698	60.1469	11.2426	22.2078	1.27927	0.778653	6.97824	5.1533
1706	63.6808	60.8493	60.1809	11.2376	22.1815	1.31174	0.830726	7.05782	5.16961
1705	63.7448	60.8511	60.2367	11.2621	22.2723	1.2716	0.815244	7.11255	5.08196
1704	63.6949	60.8066	60.2067	11.2754	22.1729	1.3419	0.723905	6.90156	5.0342
1703	63.813	60.9211	60.2412	11.174	22.18	1.34918	0.745357	6.90036	5.09111
1702	63.7597	60.9418	60.2385	11.2173	22.2914	1.18906	0.779179	6.93535	4.93266
1701	63.7179	60.8204	60.2226	11.1725	22.262	1.39074	0.7457	7.01098	5.04736
1700	63.7886	60.8753	60.2519	11.1929	22.1238	1.31582	0.776553	6.9537	5.10297
1699	63.787	60.8439	60.203	11.1488	22.179	1.33301	0.699348	6.87177	5.03592
1698	63.8318	60.9101	60.232	11.1665	22.1948	1.31196	0.698643	6.81068	5.02215
1697	63.8525	60.8744	60.2826	11.109	22.1119	1.31826	0.727047	6.86027	4.99487
1696	63.8313	61.0267	60.2898	11.0872	22.0672	1.24991	0.777964	6.85508	4.97566
1695	63.8024	60.9608	60.2327	11.1988	22.1117	1.14485	0.79177	6.85	4.93937
1694	63.9621	61.0441	60.34	10.9606	22.0329	1.23034	0.812462	6.88777	4.97829
1693	63.884	61.0132	60.3779	11.0975	22.0526	1.28532	0.71875	6.8902	5.04592
1692	63.8836	60.9484	60.35	11.0718	22.0895	1.21982	0.741213	6.86184	4.99023
1691	63.8863	61.0068	60.2052	10.9353	22.0126	1.2196	0.695603	6.79919	5.03627
1690	64.0816	60.9816	60.3647	11.0182	22.1263	1.33739	0.774729	6.80785	4.93732
1689	63.922	60.9398	60.2675	10.9912	22.0105	1.30615	0.69559	6.7345	4.9757
1688	64.0208	61.0519	60.287	10.9201	21.912	1.20389	0.786102	6.64375	4.95615
1687	63.9671	61.0641	60.3225	10.9086	21.9286	1.33587	0.597167	6.9081	4.98342
1686	64.0933	60.9953	60.3895	10.9385	21.925	1.12864	0.811835	6.74424	4.97094
1685	64.069	60.9879	60.3733	10.9674	21.954	1.17024	0.66185	6.7623	4.97952
1684	64.1525	61.0354	60.3838	10.8789	21.8938	1.27343	0.760956	6.77308	5.00741
1683	64.0831	61.0803	60.4078	10.859	21.9978	1.25749	0.735075	6.65091	4.90161
1682	64.0395	61.0672	60.3459	10.7477	22.0279	1.28117	0.731968	6.77576	4.84216
1681	63.9781	61.0889	60.344	10.8125	21.8818	1.24643	0.765015	6.74301	4.90701
1680	64.1149	61.0912	60.3889	10.7667	21.7832	1.25929	0.676767	6.71629	4.75453
1679	64.1435	61.1581	60.3896	10.7704	21.8797	1.18731	0.622006	6.61276	4.85717
1678	64.2442	61.0528	60.3766	10.8514	21.8965	1.31504	0.667445	6.66916	4.92948
1677	64.2455	61.1128	60.4107	10.8032	21.8732	1.30919	0.675248	6.85579	4.84888
1676	64.2032	61.1091	60.3599	10.6483	21.7883	1.1581	0.719836	6.78189	4.802
1675	64.1725	60.9502	60.357	10.8183	21.8348	1.20266	0.756034	6.69393	4.75306
1674	64.3006	61.1152	60.4388	10.7749	21.7531	1.18503	0.678245	6.65128	4.92085
1673	64.227	61.1484	60.4231	10.6563	21.7879	1.07463	0.83469	6.48768	4.88984
1672	64.1671	61.1199	60.4383	10.6711	21.6754	1.12227	0.665141	6.55482	4.79042
1671	64.212	61.0536	60.394	10.7195	21.705	1.21688	0.66146	6.6171	4.76993
1670	64.2631	61.1725	60.4297	10.6644	21.7794	1.23866	0.568393	6.4828	4.70553
1669	64.3242	61.1483	60.4213	10.5835	21.769	1.07847	0.885518	6.4005	4.84126
1668	64.332	61.101	60.4234	10.5754	21.5917	1.10534	0.851109	6.60345	4.85076
1667	64.3061	61.0919	60.4135	10.5803	21.6221	1.0136	0.569365	6.47599	4.67449
1666	64.3232	61.102	60.3806	10.584	21.719	1.09009	0.720478	6.44506	4.83043
1665	64.3725	61.1289	60.3716	10.5724	21.4751	1.20721	0.792282	6.50953	4.73458
1664	64.2806	61.1413	60.3393	10.5345	21.5713	1.19791	0.784312	6.41521	4.81466
1663	64.3505	61.2427	60.4455	10.5534	21.5545	1.2479	0.654054	6.41158	4.67969
1662	64.2844	61.1669	60.3741	10.4588	21.4371	1.12488	0.64186	6.44931	4.66504
1661	64.4223	61.1943	60.4244	10.5724	21.6807	0.97218	0.667661	6.42218	4.67789
1660	64.5065	61.2947	60.4764	10.3909	21.5308	1.10779	0.547583	6.46204	4.68796
1659	64.4568	61.1637	60.4979	10.5589	21.5653	1.2169	0.714113	6.41514	4.69034
1658	64.4982	61.2955	60.5625	10.4463	21.545	1.10855	0.622448	6.46112	4.64727
1657	64.3479	61.2277	60.4156	10.565	21.3387	1.12501	0.661058	6.35432	4.79954
1656	64.5093	61.2314	60.481	10.4121	21.5765	1.18004	0.644036	6.41372	4.71105
1655	64.6047	61.2754	60.523	10.3975	21.4868	1.0729	0.581691	6.41475	4.70875
1654	64.474	61.1905	60.4128	10.4635	21.3009	1.16884	0.709286	6.36797	4.65641
1653	64.4857	61.2112	60.4936	10.3722	21.5568	1.08395	0.687485	6.46225	4.74618
1652	64.459	61.2109	60.4987	10.3031	21.4105	1.18289	0.646141	6.37986	4.58525
1651	64.7098	61.1805	60.5227	10.3767	21.3676	1.15227	0.733137	6.3863	4.75087
1650	64.6383	61.2882	60.5433	10.391	21.3866	1.1172	0.542267	6.31068	4.65344
1649	64.5951	61.1738	60.4534	10.3641	21.3653	1.0719	0.624065	6.36108	4.5862
1648	64.6159	61.2703	60.4788	10.2131	21.3167	1.11283	0.671188	6.27895	4.58173
1647	64.6143	61.2207	60.607	10.2762	21.3172	1.06439	0.723062	6.39282	4.68387
1646	64.7109	61.3293	60.5803	10.4509	21.2422	1.16	0.708987	6.30519	4.52896
1645	64.6678	61.3088	60.4773	10.3336	21.2899	1.16207	0.649506	6.14524	4.63474
1644	64.7323	61.1974	60.5175	10.1361	21.1979	1.10195	0.654117	6.17772	4.52284
1643	64.7158	61.3213	60.6061	10.3153	21.1975	1.09579	0.712748	6.20971	4.51973
1642	64.8247	61.3069	60.7319	10.2139	21.2571	1.19834	0.413425	6.23663	4.63943
1641	64.7204	61.2778	60.552	10.1845	21.3614	1.03826	0.518293	6.24781	4.62271
1640	64.714	61.2532	60.5614	10.167	21.3079	1.09929	0.710698	6.11215	4.59549
1639	64.6412	61.212	60.4671	10.2681	21.2425	1.00052	0.693086	6.22441	4.61535
1638	64.845	61.3235	60.5883	10.1867	21.1257	1.22886	0.700854	6.24995	4.51935
1637	64.848	61.3598	60.5666	10.1233	21.0498	1.05262	0.761432	6.11513	4.51568
1636	64.7242	61.2306	60.467	10.1043	21.1084	1.05831	0.68528	6.12874	4.60869
1635	64.7898	61.3713	60.6775	10.1139	21.0813	1.07044	0.575976	6.13492	4.53325
1634	64.7381	61.2977	60.494	10.0854	21.1323	1.00577	0.582012	6.23432	4.52919
1633	64.7613	61.3647	60.6176	10.0809	21.2349	0.990362	0.608133	6.08476	4.46818
1632	64.8848	61.3902	60.7003	10.0635	21.0254	0.993017	0.651499	6.15854	4.4759
1631	64.8926	61.4592	60.5686	10.0032	20.9782	0.961649	0.503575	5.95636	4.44749
1630	64.8992	61.3686	60.7399	9.96222	21.094	1.13181	0.684763	6.03015	4.44822
1629	64.9064	61.378	60.5819	9.93448	21.0526	1.15605	0.591673	5.97114	4.37246
1628	64.9538	61.3802	60.6391	9.99179	20.9936	1.12214	0.682474	5.97715	4.42694
1627	64.9912	61.3841	60.5756	9.91913	20.8503	1.12101	0.634587	6.13471	4.55316
1626	64.994	61.4069	60.6432	9.98275	20.9406	1.11577	0.736023	6.12784	4.43822
1625	64.9379	61.3542	60.6646	9.9604	20.9926	1.02761	0.569815	5.98255	4.50826
1624	65.0288	61.4386	60.6838	9.99622	20.9415	1.00678	0.647137	6.07519	4.44965
1623	64.9776	61.3899	60.6629	10.009	20.7655	0.998635	0.660217	5.9296	4.48792
1622	65.0637	61.4564	60.7457	9.83792	20.8451	0.89488	0.564405	6.03041	4.39252
1621	65.1118	61.392	60.5885	9.91861	20.795	1.18044	0.605253	6.00697	4.42095
1620	65.1313	61.4647	60.6981	9.79245	20.9086	1.06281	0.563402	5.94424	4.31061
1619	65.0431	61.5028	60.6544	9.73597	20.8546	0.94258	0.598431	5.98097	4.43067
1618	65.044	61.417	60.5463	9.85784	20.8495	1.03653	0.730121	5.91215	4.33312
1617	65.1148	61.443	60.7809	9.8837	20.7975	1.02495	0.541786	5.91041	4.38195
1616	65.0621	61.4593	60.6409	9.67576	20.8093	1.04562	0.514368	5.83794	4.447
1615	65.1111	61.408	60.6534	9.75492	20.7273	0.986941	0.585434	5.80094	4.4022
1614	65.131	61.4545	60.6372	9.69471	20.7297	1.00927	0.549312	5.95373	4.35831
1613	65.175	61.4982	60.6323	9.62868	20.718	1.00231	0.758899	6.03548	4.43735
1612	65.1287	61.457	60.576	9.75462	20.7447	1.06025	0.608615	5.85082	4.31705
1611	65.138	61.4791	60.6163	9.79481	20.6618	1.0546	0.609774	5.82139	4.32207
1610	65.1735	61.4797	60.7044	9.69618	20.6334	0.834019	0.574472	5.94991	4.34272
1609	65.1466	61.4906	60.733	9.62848	20.6724	0.961781	0.610879	5.82339	4.21927
1608	65.2804	61.4629	60.6887	9.61844	20.6056	1.07653	0.591496	5.73133	4.26929
1607	65.2389	61.5028	60.7512	9.59806	20.4456	1.02813	0.593376	5.82108	4.30873
1606	65.225	61.4919	60.7039	9.54836	20.5232	1.02612	0.618917	5.85332	4.30719
1605	65.1752	61.4912	60.6711	9.57889	20.5604	0.929335	0.720209	5.88325	4.24484
1604	65.1847	61.3555	60.6136	9.5698	20.4406	1.04507	0.648399	5.7796	4.26645
1603	65.2148	61.4512	60.6676	9.61395	20.4432	1.00419	0.651974	5.73461	4.23834
1602	65.3233	61.5698	60.7084	9.60613	20.4953	0.937581	0.600134	5.7086	4.24453
1601	65.3756	61.5914	60.6549	9.47232	20.4658	0.924635	0.565973	5.75837	4.18053
1600	65.3752	61.4916	60.7194	9.42876	20.4377	0.986254	0.591734	5.75567	4.24793
1599	65.3849	61.5103	60.5968	9.41756	20.4013	1.04811	0.644853	5.72428	4.22952
1598	65.373	61.5995	60.7015	9.56696	20.5304	1.02877	0.530724	5.73444	4.28423
1597	65.3048	61.4604	60.7291	9.52084	20.2892	0.861237	0.597512	5.6688	4.31212
1596	65.3221	61.4912	60.7686	9.38801	20.4452	0.832089	0.546093	5.63674	4.22746
1595	65.3998	61.5264	60.6868	9.43457	20.3207	0.90775	0.599226	5.71214	4.1182
1594	65.3967	61.5961	60.6736	9.41995	20.2939	1.01715	0.546567	5.67257	4.2406
1593	65.4951	61.5934	60.6886	9.34141	20.3495	0.929162	0.545666	5.66463	4.19101
1592	65.5141	61.6298	60.8073	9.4613	20.2603	0.992026	0.558577	5.65283	4.14072
1591	65.4406	61.6769	60.6434	9.32099	20.2888	1.02255	0.503571	5.66142	4.11961
1590	65.3863	61.5606	60.6628	9.36059	20.3371	0.931033	0.477479	5.64629	4.08199
1589	65.4577	61.5899	60.749	9.22511	20.199	0.881585	0.436897	5.55308	4.1732
1588	65.5171	61.5446	60.6648	9.28682	20.3169	0.941918	0.497162	5.57137	4.17032
1587	65.5506	61.5605	60.7455	9.25681	20.2232	1.04702	0.529862	5.59072	4.16128
1586	65.5719	61.4863	60.6675	9.29183	20.135	0.839716	0.646078	5.61587	4.03502
1585	65.5854	61.5551	60.7447	9.37956	20.1255	0.928262	0.661492	5.66289	4.08493
1584	65.6169	61.6435	60.8235	9.36125	20.1295	0.906478	0.627462	5.50607	4.06068
1583	65.6197	61.5811	60.7792	9.3189	20.0431	0.847147	0.573422	5.52338	4.00811
1582	65.6746	61.6758	60.7741	9.17409	20.1149	0.845887	0.481324	5.58317	4.10461
1581	65.6762	61.6469	60.7316	9.20531	20.0379	0.923055	0.470854	5.47226	4.14396
1580	65.7959	61.6656	60.7934	9.15835	20.0672	0.872365	0.45614	5.47776	3.96342
1579	65.6688	61.5871	60.8099	9.09632	20.0468	0.920122	0.43379	5.50207	3.97847
1578	65.6932	61.6677	60.797	9.15348	19.9788	0.915793	0.440171	5.40585	4.0278
1577	65.6786	61.6228	60.7826	9.18532	19.9153	0.930639	0.622529	5.45395	4.09812
1576	65.6557	61.6687	60.7863	9.13012	19.9597	1.01042	0.552697	5.47429	4.12552
1575	65.807	61.7009	60.905	9.04774	20.0092	0.952145	0.608323	5.39503	4.06649
1574	65.7218	61.6074	60.8175	9.07859	19.9766	0.81332	0.628748	5.46248	3.96105
1573	65.6593	61.6025	60.7516	9.0871	19.9247	0.867911	0.589304	5.43367	4.02598
1572	65.6511	61.5765	60.7175	9.13073	19.8341	0.866157	0.530081	5.50186	3.97857
1571	65.7463	61.6678	60.7886	9.15604	19.8971	0.918219	0.469541	5.42939	3.9375
1570	65.8363	61.6623	60.8054	9.03017	19.8735	0.94497	0.487508	5.40358	3.97435
1569	65.8417	61.6346	60.7773	9.00184	19.8512	0.899739	0.477696	5.2964	4.01608
1568	65.8317	61.7302	60.8246	8.98222	19.7972	0.849938	0.526877	5.28045	3.88017
1567	65.8252	61.7314	60.7727	8.93419	19.7877	0.905152	0.456889	5.40392	3.93856
1566	65.8861	61.8121	60.7738	8.97136	19.7708	0.785375	0.504374	5.35991	3.85728
1565	65.7965	61.7343	60.7685	9.0035	19.7536	0.843405	0.50608	5.37568	3.91032
1564	65.8381	61.7796	60.8066	8.98048	19.7214	0.84806	0.500343	5.3657	3.97261
1563	65.8695	61.8131	60.7922	8.91136	19.6454	0.85374	0.58774	5.39428	3.92878
1562	65.8395	61.7318	60.7859	8.87404	19.5298	0.832486	0.526264	5.26978	3.91771
1561	65.855	61.676	60.8785	8.86317	19.5971	0.87072	0.425253	5.20114	3.96099
1560	65.9055	61.7218	60.9072	8.77975	19.6529	0.891677	0.502055	5.32854	3.90744
1559	65.9644	61.7624	60.8554	8.79735	19.6146	0.752017	0.543324	5.33714	3.87546
1558	65.903	61.7472	60.7872	8.79769	19.6651	0.809995	0.522491	5.25353	3.88751
1557	65.8708	61.7089	60.7811	8.80277	19.568	0.869387	0.55494	5.30854	3.89051
1556	65.9534	61.6696	60.8475	8.81343	19.5943	0.784199	0.515198	5.29297	3.89967
1555	65.9397	61.6568	60.8055	8.81451	19.5429	0.812722	0.426987	5.21618	3.86402
1554	65.9514	61.6255	60.7908	8.7342	19.4299	0.934986	0.510641	5.21449	3.77628
1553	65.964	61.5878	60.8279	8.79833	19.4003	0.923503	0.593588	5.2382	3.79857
1552	65.9661	61.698	60.7971	8.78315	19.4241	0.734612	0.58897	5.19108	3.87659
1551	66.0364	61.8074	60.8382	8.6936	19.3756	0.747533	0.538828	5.1793	3.8179
1550	66.0578	61.6967	60.8054	8.64586	19.295	0.844655	0.512154	5.22161	3.8214
1549	66.0725	61.6632	60.769	8.72684	19.2891	0.935665	0.488745	5.13786	3.83299
1548	66.0705	61.7178	60.8033	8.68912	19.2949	0.875137	0.5769	5.11297	3.76928
1547	66.1032	61.7085	60.8396	8.6038	19.2801	0.930067	0.605643	5.01102	3.83682
1546	66.0961	61.6962	60.7796	8.56935	19.3539	0.88275	0.541983	5.0989	3.84618
1545	66.1046	61.7438	60.8202	8.61265	19.3188	0.859132	0.502142	5.18809	3.87171
1544	66.1498	61.765	60.8263	8.64183	19.2227	0.835238	0.499696	5.10121	3.88016
1543	66.1057	61.7169	60.8212	8.55796	19.2276	0.720426	0.480964	5.15914	3.75519
1542	65.9915	61.7005	60.7545	8.5614	19.2261	0.781108	0.491833	5.15956	3.61552
1541	66.0025	61.7494	60.7372	8.53352	19.1278	0.799997	0.452277	5.06792	3.67583
1540	66.1015	61.8225	60.8395	8.57551	19.1279	0.740506	0.487827	5.01852	3.75763
1539	66.166	61.7666	60.841	8.54065	19.164	0.76628	0.482844	5.05836	3.75776
1538	66.1799	61.7958	60.8215	8.48946	19.1458	0.831109	0.529554	5.12746	3.76596
1537	66.181	61.7405	60.7717	8.50127	19.1293	0.760924	0.609333	4.96302	3.81139
1536	66.2398	61.69	60.8401	8.53153	19.0766	0.798047	0.47868	5.06196	3.72508
1535	66.2867	61.7857	60.9202	8.50524	19.0317	0.912692	0.478257	5.07479	3.64845
1534	66.2883	61.826	60.8886	8.50425	19.0533	0.804302	0.536572	4.95518	3.68196
1533	66.2366	61.7543	60.8644	8.38606	19.0348	0.753226	0.444557	4.91303	3.66315
1532	66.2464	61.7217	60.8806	8.40458	18.945	0.782567	0.409638	4.98907	3.60443
1531	66.3565	61.7677	60.8507	8.38492	19.0054	0.80458	0.454513	4.93146	3.6477
1530	66.3534	61.7658	60.8265	8.46279	19.0203	0.770264	0.543923	4.8992	3.71399
1529	66.3119	61.7372	60.8067	8.41423	18.8638	0.743018	0.53082	4.9206	3.68524
1528	66.2989	61.7744	60.8083	8.31814	18.8169	0.721373	0.450116	4.93875	3.63534
1527	66.3636	61.817	60.8486	8.30844	18.8929	0.781272	0.405568	4.94593	3.63852
1526	66.4227	61.8418	60.8662	8.29716	18.8779	0.854616	0.42309	4.90104	3.61601
1525	66.4037	61.8732	60.8859	8.33554	18.8094	0.836958	0.4553	4.90238	3.69054
1524	66.3111	61.839	60.7968	8.38627	18.8275	0.758273	0.5117	4.88786	3.6819
1523	66.2811	61.7866	60.7733	8.27614	18.8426	0.684422	0.502441	4.82657	3.57599
1522	66.3483	61.7817	60.8742	8.21351	18.7837	0.766409	0.438425	4.78234	3.59076
1521	66.4302	61.8326	60.9247	8.23985	18.7547	0.743364	0.416265	4.78988	3.62311
1520	66.4821	61.7974	60.8745	8.20687	18.7139	0.724588	0.39437	4.80058	3.54683
1519	66.4254	61.7863	60.8003	8.21595	18.6626	0.814349	0.413994	4.86104	3.51626
1518	66.4059	61.8349	60.8004	8.19917	18.6765	0.743245	0.459772	4.921	3.56293
1517	66.4609	61.8794	60.8389	8.12208	18.6462	0.726392	0.392268	4.82833	3.57233
1516	66.4525	61.9179	60.8622	8.15259	18.5913	0.740369	0.401412	4.72539	3.50957
1515	66.4897	61.9191	60.8923	8.119	18.6241	0.68416	0.429013	4.73379	3.56621
1514	66.5074	61.8897	60.864	8.04435	18.5649	0.734558	0.384155	4.82034	3.58851
1513	66.5025	61.862	60.801	8.10519	18.5721	0.734957	0.428184	4.8116	3.49498
1512	66.5207	61.8494	60.7518	8.0659	18.5734	0.716522	0.506042	4.7301	3.48807
1511	66.5005	61.8762	60.779	8.04749	18.4537	0.751684	0.517478	4.69172	3.51123
1510	66.5452	61.8966	60.8746	8.09733	18.4078	0.734037	0.541641	4.71217	3.52642
1509	66.5599	61.9252	60.9135	8.10697	18.4846	0.734333	0.540316	4.74738	3.47857
1508	66.5751	61.9354	60.8983	8.04363	18.5087	0.685543	0.474371	4.69474	3.51146
1507	66.5607	61.9166	60.894	8.01881	18.3784	0.652883	0.494344	4.715	3.50788
1506	66.6026	61.9284	60.8328	8.03682	18.3433	0.686991	0.478531	4.7489	3.50092
1505	66.6584	61.9577	60.8483	8.03455	18.3688	0.718731	0.403498	4.69577	3.5142
1504	66.6526	61.8903	60.9546	8.02133	18.2614	0.741351	0.38018	4.6165	3.48857
1503	66.6274	61.8344	60.8765	7.94855	18.252	0.771206	0.409382	4.67535	3.51886
1502	66.5744	61.905	60.8226	7.90804	18.3258	0.737488	0.539001	4.66921	3.52817
1501	66.5663	61.9271	60.8276	7.90023	18.2554	0.734279	0.472116	4.65087	3.43622
1500	66.628	61.9354	60.8518	7.9023	18.2441	0.699593	0.370613	4.6621	3.30009
1499	66.6954	61.9294	60.914	7.81275	18.2743	0.580017	0.371259	4.63031	3.282
1498	66.7227	61.9822	60.8915	7.80314	18.2766	0.66824	0.382725	4.5762	3.34305
1497	66.7277	62.052	60.8789	7.86761	18.2244	0.790792	0.339983	4.50438	3.36999
1496	66.7742	62.0135	60.8623	7.88071	18.131	0.801284	0.408425	4.49675	3.42881
1495	66.7752	61.9637	60.8323	7.79713	18.064	0.673544	0.492907	4.48452	3.46063
1494	66.7968	61.92	60.8217	7.7604	18.0779	0.69908	0.435349	4.45988	3.39662
1493	66.8117	61.8676	60.8246	7.75984	18.0995	0.771621	0.474922	4.52015	3.30658
1492	66.8462	61.9268	60.9224	7.72953	18.0172	0.702643	0.507618	4.56171	3.35553
1491	66.8587	61.9826	60.8889	7.78227	18.0476	0.660336	0.48059	4.4994	3.41296
1490	66.7107	61.9067	60.8203	7.8267	18.0345	0.73819	0.455739	4.49002	3.38125
1489	66.7684	61.8825	60.8675	7.75655	17.9396	0.711754	0.422789	4.55764	3.34367
1488	66.8413	61.8934	60.9027	7.62528	17.8969	0.654207	0.409655	4.53611	3.36826
1487	66.8255	61.9311	60.837	7.68686	17.8841	0.618102	0.483607	4.43916	3.32161
1486	66.858	61.9538	60.826	7.72884	17.853	0.717669	0.4158	4.48404	3.30704
1485	66.8612	61.9378	60.8316	7.75607	17.8994	0.746191	0.317506	4.48067	3.35962
1484	66.8379	61.9558	60.8552	7.7221	17.871	0.676766	0.352007	4.43142	3.24573
1483	66.8238	61.9848	60.9154	7.54932	17.837	0.630554	0.369514	4.34088	3.25476
1482	66.898	61.9815	60.9359	7.53548	17.7794	0.570708	0.411632	4.37824	3.33679
1481	66.9463	61.9978	60.9472	7.59289	17.7795	0.655767	0.493331	4.39698	3.28226
1480	66.9746	62.0051	60.9038	7.61677	17.8463	0.686614	0.483557	4.30866	3.27337
1479	66.9786	61.9713	60.9424	7.64278	17.7984	0.708128	0.421913	4.32213	3.24803
1478	66.926	61.9595	60.9639	7.54024	17.6793	0.722599	0.469939	4.37403	3.23928
1477	66.8982	61.981	60.946	7.51865	17.5793	0.709076	0.381026	4.34133	3.26095
1476	66.9515	62.0047	60.8712	7.59681	17.6276	0.678043	0.414257	4.3389	3.20509
1475	67.0353	62.0167	60.8897	7.53714	17.6897	0.708028	0.420649	4.30652	3.2674
1474	67.0066	61.8986	60.8828	7.57163	17.5983	0.626408	0.330244	4.2903	3.23558
1473	66.9693	61.9202	60.832	7.58651	17.5238	0.582445	0.402369	4.25025	3.17951
1472	67.0075	61.9979	60.8295	7.48386	17.5213	0.684448	0.374202	4.33725	3.22297
1471	67.0194	61.97	60.8752	7.39245	17.5527	0.717847	0.374287	4.31088	3.20393
1470	66.9547	62.0006	60.9293	7.40468	17.5427	0.689607	0.404006	4.29095	3.22298
1469	67.0826	62.0585	60.9088	7.43954	17.4862	0.694049	0.42725	4.26648	3.23754
1468	67.0417	62.0353	60.8688	7.40546	17.4483	0.669084	0.464629	4.22849	3.15087
1467	67.0741	62.0818	60.8594	7.39499	17.4346	0.649514	0.392968	4.24763	3.13865
1466	67.1112	62.0621	60.9343	7.32484	17.4487	0.529186	0.37713	4.2776	3.19819
1465	67.1357	62.0716	60.946	7.31693	17.4001	0.544584	0.453188	4.32714	3.19778
1464	67.1881	62.0405	60.9158	7.34326	17.3768	0.645696	0.378508	4.30131	3.20005
1463	67.1479	62.0234	60.9685	7.26735	17.3173	0.693103	0.372625	4.17891	3.12485
1462	67.0905	61.9888	60.9548	7.28836	17.3477	0.638526	0.448681	4.16843	3.14466
1461	67.127	61.9571	60.8614	7.24943	17.2317	0.650922	0.480766	4.13944	3.1322
1460	67.1585	62.0022	60.8418	7.23513	17.1392	0.644728	0.428337	4.20148	3.1525
1459	67.2783	62.0922	60.9233	7.36441	17.1914	0.588415	0.360683	4.1745	2.98544
1458	67.2219	62.036	60.8878	7.31622	17.2151	0.617224	0.367001	4.16221	3.06334
1457	67.1852	62.0622	60.8804	7.29488	17.2645	0.702545	0.386826	4.17185	3.14664
1456	67.3044	62.1195	60.9144	7.34716	17.2376	0.674187	0.35214	4.15484	3.12324
1455	67.2759	62.0931	60.9491	7.26325	17.2211	0.708913	0.416757	4.11656	3.13919
1454	67.251	62.1199	60.954	7.1769	17.1491	0.668746	0.360016	4.11061	3.15248
1453	67.2709	62.0574	60.8731	7.18222	17.0714	0.620141	0.35688	4.08726	3.09839
1452	67.2805	62.1297	60.9057	7.17674	17.1166	0.586905	0.330719	4.07593	3.02646
1451	67.2662	62.1277	60.9215	7.13691	17.1078	0.646092	0.29287	4.08584	3.02654
1450	67.2596	62.1064	60.9277	7.0891	17.0456	0.684577	0.336691	4.14114	3.07037
1449	67.26	61.9958	60.8625	7.17576	16.9078	0.603836	0.360617	4.06131	3.05048
1448	67.3529	62.1263	60.9648	7.22935	16.9931	0.668563	0.354424	3.94766	2.96153
1447	67.3826	62.1834	60.9567	7.05574	17.0062	0.649746	0.313856	3.97375	3.06718
1446	67.4333	62.1644	60.9256	7.11923	16.8878	0.558368	0.372924	4.01721	3.03577
1445	67.3978	62.0975	60.9323	7.09051	16.8772	0.479823	0.304156	4.04718	3.04249
1444	67.3408	62.0441	60.9423	7.0952	16.8641	0.507177	0.390891	4.0414	3.05195
1443	67.3248	62.0837	60.8869	7.03864	16.7405	0.706039	0.413853	4.04471	2.9919
1442	67.3548	62.0575	60.893	7.0308	16.8078	0.607513	0.378308	3.98334	2.94396
1441	67.4369	62.0135	60.8889	6.98388	16.815	0.562752	0.330138	3.945	2.9891
1440	67.4324	62.0198	60.8472	6.91654	16.7964	0.585553	0.38858	4.01533	3.01557
1439	67.4769	62.0496	60.86	7.05156	16.7702	0.633559	0.455515	3.94009	2.99058
1438	67.4552	62.0634	60.893	7.05328	16.712	0.533503	0.336677	3.87187	2.85694
1437	67.5105	62.1315	60.9355	6.93978	16.6403	0.538403	0.3238	3.87839	2.90874
1436	67.3835	62.0293	60.8698	6.94929	16.6106	0.531642	0.369576	3.87717	2.90617
1435	67.5079	62.1428	60.9335	6.97974	16.6568	0.530988	0.460381	3.89727	2.93996
1434	67.4301	62.2017	60.9547	6.88369	16.599	0.633439	0.386839	3.97568	2.92708
1433	67.4594	62.111	60.917	6.89288	16.444	0.499467	0.381956	3.84343	3.0005
1432	67.4778	62.0699	60.8282	7.04776	16.5274	0.542519	0.404392	3.8005	2.92205
1431	67.5109	62.1544	60.873	6.89403	16.6169	0.620214	0.39131	3.87148	2.92155
1430	67.622	62.2288	60.9302	6.88633	16.5274	0.629513	0.368195	3.78272	2.89448
1429	67.5468	62.1304	60.803	6.87741	16.4154	0.568945	0.328298	3.79843	2.94746
1428	67.4918	62.1376	60.8355	6.97676	16.4591	0.567668	0.375917	3.97951	2.89643
1427	67.6176	62.1027	60.8873	6.81306	16.456	0.528922	0.41416	3.82879	2.97714
1426	67.5644	62.2032	60.8918	6.84874	16.4032	0.668948	0.446027	3.78818	2.91879
1425	67.5783	62.1988	60.8963	6.83606	16.3911	0.49458	0.335393	3.9288	2.8661
1424	67.5779	62.1152	60.8227	6.82196	16.3401	0.502397	0.298385	3.86994	2.83683
1423	67.619	62.1545	60.906	6.58867	16.3862	0.512953	0.391904	3.70857	2.87353
1422	67.5704	62.1714	60.8287	6.78433	16.3476	0.47937	0.318933	3.75026	2.80955
1421	67.6428	62.167	60.8982	6.82413	16.3456	0.550453	0.281466	3.79678	2.85524
1420	67.6587	62.06	60.8795	6.7778	16.2399	0.567597	0.387023	3.74085	2.76692
1419	67.6654	62.0987	60.898	6.79316	16.2871	0.589098	0.424653	3.75699	2.87783
1418	67.7025	62.2179	60.8897	6.68136	16.1791	0.563444	0.342041	3.76208	2.74437
1417	67.757	62.2581	60.9409	6.64698	16.2646	0.533527	0.242815	3.74134	2.7527
1416	67.6814	62.2915	60.9395	6.69764	16.1714	0.444699	0.197079	3.67687	2.83607
1415	67.8377	62.2947	61.0457	6.73286	16.219	0.502813	0.238184	3.67835	2.76778
1414	67.7197	62.2651	60.9132	6.58495	16.1604	0.490657	0.389531	3.74528	2.74918
1413	67.7542	62.345	60.941	6.66842	16.1291	0.576899	0.272771	3.66082	2.81226
1412	67.7285	62.163	60.9499	6.62271	15.9663	0.552339	0.40813	3.66809	2.65206
1411	67.847	62.2948	60.9944	6.60376	16.0899	0.497374	0.308351	3.66842	2.77664
1410	67.8152	62.3589	60.8887	6.51335	16.0469	0.557429	0.334421	3.60047	2.73929
1409	67.7588	62.3588	60.9976	6.58316	15.9727	0.70182	0.302891	3.64762	2.73728
1408	67.7955	62.2523	60.9698	6.70675	15.8639	0.456067	0.315526	3.58279	2.73567
1407	67.9602	62.3104	61.0345	6.71831	15.8858	0.589002	0.281889	3.56681	2.79432
1406	67.9311	62.3331	61.0406	6.60853	15.8452	0.520879	0.292648	3.61929	2.78565
1405	67.8631	62.242	61.0009	6.59601	15.8212	0.486608	0.394545	3.54712	2.7489
1404	67.901	62.2453	61.017	6.54424	15.9066	0.568406	0.345308	3.59948	2.70838
1403	67.9522	62.4019	61.0151	6.54351	15.844	0.477073	0.269646	3.61294	2.78924
1402	67.9476	62.4031	61.0817	6.53364	15.6964	0.625785	0.393931	3.53107	2.64002
1401	67.9372	62.3879	61.0641	6.43589	15.8243	0.576577	0.340503	3.5281	2.76111
1400	68.1323	62.4188	61.0953	6.49087	15.8501	0.53319	0.294352	3.5929	2.77347
1399	68.1043	62.3633	61.0782	6.52115	15.732	0.469756	0.298843	3.67688	2.67474
1398	68.0908	62.4237	61.0985	6.43376	15.7536	0.473413	0.382311	3.45188	2.67923
1397	68.1296	62.4545	61.1251	6.41801	15.7006	0.544845	0.378485	3.49854	2.65078
1396	68.1695	62.4911	61.1618	6.3712	15.6792	0.44904	0.247087	3.43116	2.65704
1395	68.1041	62.5327	61.1831	6.49819	15.5551	0.502921	0.34802	3.62892	2.71908
1394	68.0379	62.4325	61.1276	6.30781	15.6329	0.544322	0.317683	3.50918	2.67549
1393	68.2024	62.5855	61.1741	6.34276	15.5959	0.424266	0.269308	3.44729	2.59903
1392	68.2218	62.6021	61.1942	6.32662	15.5853	0.331829	0.251248	3.48453	2.57128
1391	68.2936	62.6022	61.2252	6.13463	15.6416	0.319209	0.182484	3.38758	2.51428
1390	68.3876	62.6195	61.1749	6.32962	15.4359	0.561783	0.335261	3.48895	2.64627
1389	68.3808	62.6191	61.2572	6.46914	15.5293	0.522201	0.336913	3.41358	2.54737
1388	68.353	62.5911	61.2768	6.37515	15.4916	0.552019	0.347479	3.60186	2.69517
1387	68.4173	62.6027	61.2518	6.43088	15.6152	0.657144	0.362098	3.64062	2.66307
1386	68.3221	62.7434	61.2972	6.46418	15.4633	0.550757	0.428356	3.58762	2.69079
1385	68.4835	62.7685	61.3699	6.25768	15.4712	0.47916	0.327715	3.4811	2.68401
1384	68.5439	62.8259	61.4368	6.15517	15.4379	0.524854	0.256204	3.43741	2.65387
1383	68.546	62.8203	61.3865	6.27993	15.4334	0.471165	0.2985	3.32166	2.65184
1382	68.4955	62.6906	61.1736	6.22207	15.2695	0.466254	0.212294	3.32296	2.55426
1381	68.4806	62.6722	61.3691	6.30812	15.3418	0.485616	0.224974	3.4053	2.48743
1380	68.6152	62.7966	61.3546	6.17516	15.2528	0.404749	0.115537	3.36753	2.55518
1379	68.5607	62.7526	61.2774	6.14575	15.3385	0.405538	0.162215	3.21573	2.6172
1378	68.5712	62.7518	61.3181	6.27936	15.2085	0.368035	0.258141	3.1342	2.58362
1377	68.6545	62.8143	61.4146	6.08907	15.3002	0.33224	0.260295	3.34279	2.58883
1376	68.676	62.811	61.3551	6.20355	15.184	0.520838	0.164417	3.33419	2.53102
1375	68.7364	62.8491	61.3871	6.19288	15.238	0.612761	0.342844	3.40785	2.5836
1374	68.7481	62.8443	61.48	6.17825	15.199	0.515385	0.411865	3.34419	2.57729
1373	68.8633	62.8742	61.4733	6.21286	15.2209	0.544506	0.393859	3.42073	2.60756
1372	68.6945	63.0223	61.4988	6.21699	15.1326	0.566992	0.456139	3.21889	2.64378
1371	68.709	62.9088	61.4395	6.17006	15.2277	0.613456	0.226126	3.30991	2.58478
1370	68.6887	62.9227	61.4451	6.18523	15.0691	0.391955	0.320942	3.42799	2.48961
1369	68.7499	62.957	61.4736	6.09028	15.0992	0.388324	0.190154	3.28688	2.39508
1368	68.9078	62.9128	61.4826	6.0896	14.9603	0.420478	0.283295	3.1829	2.42472
1367	68.9255	63.012	61.4912	6.10101	15.0963	0.514931	0.396221	3.29373	2.55069
1366	68.8748	63.0269	61.4588	6.17826	14.8937	0.44472	0.307996	3.12888	2.56467
1365	68.8715	63.0844	61.5331	5.91115	15.1073	0.517479	0.304486	3.23585	2.48357
1364	69.0089	63.0485	61.6196	6.10661	15.1149	0.486889	0.413464	3.29564	2.61022
1363	68.8928	63.0071	61.5927	6.0077	14.9192	0.485849	0.381567	3.26128	2.5011
1362	68.934	62.9888	61.4633	5.9898	14.8355	0.383194	0.192702	3.20805	2.39174
1361	68.9407	63.0659	61.5472	5.9276	14.7483	0.388843	0.17112	3.1684	2.4527
1360	68.9582	63.0413	61.5103	5.94748	14.8641	0.464285	0.294373	3.17762	2.45022
1359	68.9328	63.0441	61.5489	5.87507	14.6923	0.356866	0.350051	3.03829	2.41748
1358	69.0892	63.0895	61.5837	5.82231	14.7442	0.46738	0.359579	3.1309	2.38339
1357	68.969	63.0865	61.4675	6.03865	14.8292	0.512274	0.248713	3.20588	2.4295
1356	69.0786	63.1505	61.5513	5.94456	14.7064	0.439156	0.219209	3.11456	2.46265
1355	69.1406	63.1056	61.5519	5.91987	14.7148	0.45123	0.296491	3.09589	2.45086
1354	68.9788	63.1388	61.5426	5.89924	14.5897	0.376816	0.225813	3.08446	2.48791
1353	69.184	63.1111	61.6742	5.91291	14.6043	0.415114	0.221431	3.10391	2.44764
1352	69.0669	63.1276	61.6124	5.82636	14.7518	0.422544	0.286551	3.08089	2.35501
1351	69.1958	63.2162	61.6804	5.80117	14.7015	0.398889	0.231018	3.1547	2.3111
1350	69.2871	63.2195	61.732	5.99849	14.6617	0.42766	0.312031	3.13	2.35647
1349	69.1927	63.2525	61.6473	5.85106	14.5655	0.435408	0.331924	3.085	2.38585
1348	69.2725	63.2212	61.7343	5.74602	14.6365	0.446362	0.369756	3.1273	2.41111
1347	69.2856	63.316	61.8628	5.85281	14.5453	0.45437	0.389223	3.09462	2.39394
1346	69.2042	63.2521	61.7582	5.86132	14.5079	0.449267	0.283248	3.15465	2.40332
1345	69.1892	63.2603	61.7778	5.76558	14.405	0.369321	0.373288	2.96804	2.37388
1344	69.271	63.26	61.7725	5.72854	14.4605	0.514706	0.262933	3.09977	2.30755
1343	69.2463	63.3107	61.7733	5.80805	14.4851	0.53318	0.244758	3.0293	2.36698
1342	69.3874	63.413	61.7973	5.8885	14.481	0.382472	0.161109	3.02822	2.24214
1341	69.3749	63.3957	61.8023	5.76766	14.3802	0.440562	0.220466	3.06112	2.40462
1340	69.4385	63.4225	61.7999	5.72698	14.4521	0.400255	0.249698	2.99296	2.35482
1339	69.4311	63.4103	61.8018	5.69221	14.4252	0.507259	0.298382	3.01083	2.33516
1338	69.4087	63.4749	61.7496	5.79939	14.3801	0.390468	0.332382	2.9067	2.39131
1337	69.4432	63.4418	61.7047	5.74702	14.4168	0.433334	0.282773	2.96133	2.28607
1336	69.4203	63.472	61.8038	5.70177	14.2865	0.366139	0.31531	3.03944	2.31215
1335	69.5207	63.5237	61.8867	5.62396	14.3203	0.563872	0.310997	2.90156	2.18371
1334	69.4647	63.4493	61.8175	5.69507	14.2566	0.538345	0.248318	2.93885	2.43132
1333	69.5387	63.5613	61.9531	5.7614	14.135	0.489635	0.230748	2.99077	2.36108
1332	69.4744	63.5238	61.8553	5.74848	14.1433	0.388661	0.312848	2.70062	2.34036
1331	69.5521	63.5932	61.8404	5.64315	14.104	0.43663	0.368888	2.88539	2.29953
1330	69.5447	63.4262	61.8892	5.70287	14.0523	0.420131	0.145551	2.96344	2.20855
1329	69.6145	63.5261	61.7882	5.65112	14.1143	0.447517	0.229156	2.95467	2.27919
1328	69.6465	63.5793	61.8522	5.65615	14.1747	0.289366	0.212571	3.00977	2.2373
1327	69.6637	63.5858	61.8827	5.54398	14.083	0.276798	0.265349	2.87766	2.19647
1326	69.6895	63.6794	61.8867	5.46414	13.9168	0.356565	0.316537	2.79663	2.21382
1325	69.7397	63.7823	62.0432	5.57506	13.9864	0.300462	0.168307	2.95002	2.30917
1324	69.7617	63.7285	62.0258	5.50096	14.1285	0.33407	0.322919	2.82858	2.21675
1323	69.8446	63.6761	62.1024	5.48221	13.998	0.452182	0.185222	2.91066	2.16996
1322	69.8327	63.7389	62.0566	5.43253	14.0676	0.477921	0.199095	2.90504	2.15751
1321	69.815	63.6803	62.0747	5.58427	13.9889	0.37432	0.241155	2.83732	2.30024
1320	69.7975	63.7515	62.161	5.51277	13.9577	0.399933	0.301195	2.85439	2.18175
1319	69.7657	63.7066	62.0068	5.6117	13.8514	0.257399	0.264958	2.95999	2.13294
1318	69.8831	63.7961	62.1017	5.44938	13.8981	0.357662	0.36135	2.89384	2.15344
1317	69.8717	63.8235	62.108	5.3948	13.892	0.42059	0.331491	2.7651	2.23964
1316	69.9066	63.8629	62.1739	5.4539	13.7666	0.432651	0.288188	2.76563	2.21599
1315	70.0257	63.8253	62.2	5.48485	13.7583	0.42199	0.295993	2.75636	2.26279
1314	70.0092	63.8859	62.1776	5.4251	13.8635	0.373665	0.273591	2.7606	2.15205
1313	70.0169	63.9897	62.1969	5.44952	13.7659	0.299692	0.240861	2.75293	2.14949
1312	70.0156	63.9547	62.2104	5.43987	13.7843	0.428833	0.277095	2.86171	2.01641
1311	70.0665	63.8805	62.2395	5.40873	13.8018	0.330746	0.242621	2.79447	2.06237
1310	70.1485	64.0533	62.1998	5.37014	13.7773	0.39195	0.256261	2.72254	2.17757
1309	70.0798	63.9794	62.2286	5.33753	13.6356	0.358361	0.191255	2.75757	2.20869
1308	70.0667	64.1284	62.2693	5.44825	13.6723	0.450811	0.268257	2.73574	2.21895
1307	70.075	64.0434	62.2871	5.50703	13.5962	0.383063	0.27834	2.79335	2.12486
1306	70.0024	64.0314	62.2394	5.35945	13.5699	0.381022	0.276421	2.74155	2.08991
1305	70.1196	64.1362	62.222	5.33073	13.5633	0.343909	0.140862	2.7205	2.13237
1304	70.1068	64.131	62.2793	5.34092	13.5969	0.323645	0.188309	2.77295	2.11995
1303	70.2185	64.1452	62.3085	5.35096	13.5926	0.386803	0.190086	2.69123	2.27247
1302	70.2547	64.0605	62.2767	5.35859	13.6467	0.473592	0.359064	2.6722	2.21685
1301	70.3067	64.1547	62.3978	5.26522	13.4897	0.407291	0.31714	2.6083	2.1499
1300	70.2851	64.2202	62.3948	5.26531	13.4531	0.389456	0.243572	2.63026	2.15482
1299	70.3239	64.2539	62.4081	5.38509	13.4305	0.434176	0.129737	2.74106	2.05192
1298	70.3816	64.2325	62.4656	5.35121	13.4826	0.39008	0.287079	2.78842	2.01922
1297	70.3012	64.2843	62.3986	5.29465	13.3682	0.370945	0.314479	2.71314	2.07875
1296	70.2678	64.2724	62.3669	5.23642	13.2814	0.289423	0.262258	2.66678	2.0651
1295	70.3265	64.2058	62.4103	5.28071	13.2898	0.349724	0.179287	2.60182	2.13273
1294	70.4291	64.3613	62.5741	5.32989	13.296	0.395851	0.228503	2.61687	2.02245
1293	70.4393	64.4165	62.5235	5.20267	13.3894	0.285296	0.235459	2.65177	2.08155
1292	70.5085	64.3839	62.4408	5.20389	13.3253	0.365028	0.250721	2.63137	2.12247
1291	70.4721	64.413	62.4946	5.25912	13.2551	0.360073	0.238176	2.63652	2.06701
1290	70.4618	64.3911	62.4614	5.18918	13.1933	0.311817	0.20315	2.60062	1.99467
1289	70.5913	64.4768	62.5535	5.1772	13.2675	0.393706	0.222726	2.60945	2.08325
1288	70.5565	64.4171	62.4899	5.19796	13.2003	0.34542	0.204526	2.56288	2.05364
1287	70.6687	64.5167	62.5971	5.14883	13.2921	0.215167	0.341303	2.56636	2.02047
1286	70.6185	64.5646	62.6435	5.21119	13.2319	0.369169	0.316957	2.54063	2.05267
1285	70.6263	64.5498	62.6464	5.14557	13.0803	0.38274	0.249725	2.65808	1.95515
1284	70.6852	64.5496	62.6344	5.11067	13.0806	0.335767	0.22016	2.50089	2.02299
1283	70.7749	64.6654	62.7909	5.10831	13.1011	0.381667	0.211853	2.57435	2.06343
1282	70.7145	64.6312	62.753	5.0936	13.0866	0.376231	0.23957	2.49438	2.08394
1281	70.725	64.6024	62.7257	5.13063	13.0267	0.365244	0.193532	2.5801	1.97362
1280	70.703	64.602	62.7082	5.19999	13.0119	0.331004	0.2503	2.50162	1.96154
1279	70.7531	64.6702	62.7772	5.1719	12.9563	0.336069	0.194906	2.41709	2.03289
1278	70.8428	64.774	62.7556	5.14011	12.9696	0.332511	0.092108	2.51456	1.92663
1277	70.8793	64.7792	62.7676	5.10698	12.9787	0.28234	0.186998	2.55856	1.8686
1276	70.8051	64.7009	62.7757	5.0567	12.8985	0.259599	0.293371	2.5347	1.85455
1275	70.8619	64.8041	62.8655	4.96521	12.9118	0.335233	0.22769	2.48821	1.89254
1274	70.8814	64.8352	62.8796	5.09569	12.8721	0.386009	0.107843	2.48316	1.99418
1273	70.8144	64.8734	62.8397	5.16762	12.9203	0.345478	0.172187	2.50218	2.00826
1272	70.9232	64.8925	62.8674	5.09341	12.9307	0.292414	0.18844	2.41402	1.95654
1271	70.9729	64.9169	62.8631	4.9906	12.8451	0.319684	0.19387	2.37694	2.00547
1270	70.9758	64.935	62.8557	5.00171	12.7875	0.317826	0.153395	2.41386	2.07773
1269	71.038	64.9784	62.9529	5.03984	12.8963	0.366711	0.211232	2.39761	2.024
1268	71.1159	65.085	62.973	5.02348	12.8665	0.350882	0.151061	2.49683	1.91991
1267	71.1403	65.0549	63.0372	4.98288	12.7923	0.368768	0.205833	2.53903	1.96747
1266	71.0984	65.0697	63.0997	4.97956	12.6823	0.318361	0.159089	2.4998	1.96957
1265	71.0989	65.0515	63.0447	5.00012	12.6675	0.337213	0.186851	2.33549	1.9947
1264	71.137	65.0482	63.0192	4.88813	12.6391	0.354513	0.290859	2.31234	1.93345
1263	71.1923	65.1051	63.0318	4.92209	12.6767	0.302282	0.212748	2.42488	1.76244
1262	71.2007	65.1853	63.1026	4.95422	12.6569	0.315066	0.298324	2.48815	1.942
1261	71.2313	65.2874	63.131	4.94747	12.6505	0.368133	0.197943	2.42448	1.99046
1260	71.1959	65.2361	63.1196	4.96007	12.6725	0.361742	0.206421	2.37632	1.83922
1259	71.2269	65.2642	63.1915	4.94197	12.6827	0.29717	0.219819	2.43273	1.89311
1258	71.2776	65.3163	63.2508	4.79505	12.6745	0.337789	0.174272	2.38098	1.88114
1257	71.3675	65.3449	63.2871	4.89947	12.595	0.358733	0.176839	2.39174	1.89054
1256	71.4115	65.4177	63.2773	4.93639	12.5249	0.314545	0.13319	2.31441	1.85528
1255	71.4218	65.4379	63.3035	4.92228	12.5084	0.378531	0.095506	2.25574	1.83355
1254	71.4847	65.4352	63.3904	4.85611	12.5105	0.364193	0.26216	2.27175	1.85736
1253	71.4777	65.5304	63.4232	4.90003	12.5103	0.336513	0.371083	2.2859	1.91913
1252	71.4748	65.5583	63.3995	4.83915	12.44	0.348339	0.279113	2.39783	1.9024
1251	71.4745	65.5375	63.3919	4.80869	12.4491	0.297171	0.218857	2.34069	1.81749
1250	71.4413	65.5425	63.3654	4.85022	12.4145	0.222708	0.202579	2.2677	1.79196
1249	71.4226	65.5649	63.3335	4.84987	12.4096	0.285011	0.17233	2.24434	1.85124
1248	71.4963	65.5918	63.4384	4.85306	12.4393	0.293732	0.194534	2.28909	1.8854
1247	71.4981	65.596	63.427	4.83744	12.4055	0.325929	0.178691	2.2918	1.9312
1246	71.5355	65.6799	63.4914	4.77073	12.3725	0.310111	0.305606	2.27752	1.88641
1245	71.5426	65.6937	63.5487	4.74177	12.2732	0.319971	0.320523	2.21885	1.8419
1244	71.6067	65.7248	63.5919	4.73713	12.2166	0.274441	0.209596	2.1981	1.78276
1243	71.7108	65.8005	63.5857	4.73227	12.2233	0.194411	0.203962	2.29574	1.72757
1242	71.6771	65.7392	63.5347	4.68987	12.2367	0.203244	0.249369	2.27988	1.74788
1241	71.6663	65.6982	63.5547	4.74785	12.2409	0.206297	0.196744	2.23326	1.77409
1240	71.7483	65.7741	63.6041	4.78341	12.2113	0.268986	0.228473	2.17623	1.72756
1239	71.7955	65.8885	63.5981	4.65683	12.2538	0.25882	0.282717	2.12635	1.68463
1238	71.7812	65.9737	63.619	4.62731	12.2016	0.259687	0.220081	2.14329	1.71489
1237	71.7817	65.9856	63.6614	4.66069	12.1051	0.299193	0.269135	2.24932	1.76262
1236	71.8552	65.997	63.6927	4.67465	12.0648	0.299892	0.281694	2.22405	1.74816
1235	71.9247	66.0205	63.7466	4.70307	12.0322	0.316503	0.247873	2.13697	1.71904
1234	71.908	66.0959	63.8158	4.72042	12.0424	0.26724	0.172375	2.04967	1.68196
1233	71.9153	66.1739	63.8593	4.71485	12.0657	0.271633	0.118684	2.08148	1.76768
1232	71.9464	66.1712	63.8673	4.67147	12.1273	0.285043	0.226803	2.1555	1.83197
1231	71.9599	66.1589	63.8239	4.74666	12.1072	0.26682	0.205211	2.14319	1.79961
1230	71.9848	66.1776	63.8182	4.73337	12.0059	0.333785	0.20998	2.16396	1.71867
1229	72.0435	66.2493	63.9152	4.68802	11.998	0.412456	0.261354	2.15123	1.74759
1228	72.0393	66.3106	63.9857	4.64708	11.9559	0.318829	0.233153	2.17377	1.80241
1227	72.0531	66.3339	64.0161	4.56843	11.856	0.27202	0.182601	2.1488	1.731
1226	72.1443	66.3971	64.0826	4.5598	11.9714	0.360052	0.176352	2.09381	1.71806
1225	72.154	66.3373	64.0131	4.6002	11.9682	0.33727	0.150408	2.14051	1.76008
1224	72.1113	66.3275	63.9389	4.63726	11.8564	0.261798	0.130027	2.13911	1.70936
1223	72.1537	66.4458	64.0378	4.57813	11.9073	0.185807	0.211065	2.10165	1.73444
1222	72.1937	66.4518	64.151	4.58859	11.9226	0.208046	0.176908	2.1218	1.7644
1221	72.2262	66.4476	64.172	4.62476	11.8483	0.340072	0.193999	2.10709	1.75012
1220	72.2114	66.502	64.1826	4.65795	11.807	0.36405	0.2531	2.14851	1.71664
1219	72.133	66.5164	64.1409	4.62806	11.8068	0.282363	0.236557	2.14242	1.66077
1218	72.2438	66.6432	64.1868	4.5485	11.7733	0.242119	0.236153	2.07003	1.68189
1217	72.3263	66.7223	64.2543	4.56312	11.7065	0.235265	0.264432	2.04061	1.70748
1216	72.3299	66.6638	64.2673	4.54243	11.77	0.276888	0.181628	2.10545	1.72633
1215	72.381	66.6671	64.2714	4.50458	11.7717	0.273383	0.236345	2.0699	1.70805
1214	72.4261	66.7308	64.3248	4.50486	11.6912	0.26572	0.271221	1.96631	1.69573
1213	72.407	66.7562	64.373	4.52757	11.6892	0.230383	0.162947	2.03675	1.71618
1212	72.3564	66.8135	64.37	4.53169	11.6956	0.287973	0.208159	2.09305	1.67059
1211	72.3593	66.8503	64.4499	4.44116	11.686	0.291391	0.242719	2.09189	1.74294
1210	72.3887	66.8655	64.4411	4.45643	11.7168	0.290471	0.216135	2.13614	1.68884
1209	72.4134	66.8963	64.4065	4.50925	11.6367	0.271816	0.219946	2.0378	1.60762
1208	72.4606	66.9388	64.4551	4.4844	11.6013	0.241947	0.155923	1.94446	1.70123
1207	72.483	66.9499	64.4901	4.48331	11.5934	0.329366	0.110859	1.99536	1.65426
1206	72.4621	67.009	64.4952	4.43603	11.5703	0.392089	0.125439	2.11037	1.60476
1205	72.4968	67.0567	64.5771	4.4716	11.5287	0.263715	0.157074	2.1055	1.69058
1204	72.5797	67.0906	64.6415	4.46389	11.5077	0.187176	0.192309	1.90237	1.66368
1203	72.6217	67.1751	64.6724	4.4708	11.5646	0.255893	0.166349	1.99683	1.63196
1202	72.5782	67.1424	64.6242	4.41293	11.5127	0.25202	0.221481	2.02056	1.63694
1201	72.6074	67.1427	64.6478	4.44881	11.429	0.304157	0.233593	2.06358	1.74906
1200	72.6152	67.206	64.7384	4.49038	11.4267	0.208049	0.204658	2.02238	1.65505
1199	72.7067	67.2579	64.8012	4.52748	11.4163	0.207345	0.19057	1.92339	1.51301
1198	72.7602	67.293	64.8131	4.46048	11.36	0.216994	0.157706	1.913	1.64212
1197	72.8204	67.3981	64.7941	4.41848	11.414	0.193267	0.17219	1.90252	1.64043
1196	72.7818	67.4706	64.8103	4.39685	11.3999	0.228924	0.18182	1.92588	1.50395
1195	72.6791	67.4474	64.8881	4.34367	11.3594	0.267713	0.155822	1.96947	1.54612
1194	72.7059	67.4194	64.8924	4.33556	11.3018	0.353006	0.16871	1.92742	1.54278
1193	72.7392	67.4597	64.8642	4.37274	11.2738	0.403158	0.144064	1.946	1.52389
1192	72.7159	67.5076	64.8967	4.33736	11.2655	0.325387	0.178583	1.88647	1.49066
1191	72.8178	67.5619	64.9823	4.32878	11.1844	0.260531	0.179705	1.88044	1.56053
1190	72.8631	67.5977	65.052	4.32186	11.2681	0.301708	0.186907	1.9158	1.52293
1189	72.8708	67.7024	64.9799	4.35397	11.3688	0.344906	0.239831	1.84005	1.48443
1188	72.9204	67.7996	65.0515	4.35397	11.3089	0.194823	0.101487	1.77988	1.51883
1187	72.9863	67.8323	65.2074	4.31815	11.2969	0.157297	0.155191	1.85103	1.56665
1186	73.0063	67.8152	65.1898	4.32673	11.3023	0.241457	0.112442	1.89732	1.50881
1185	72.8877	67.7783	65.1344	4.29971	11.1642	0.260283	0.165011	1.8671	1.50276
1184	72.9328	67.7721	65.1735	4.29243	11.0108	0.251866	0.22872	1.79874	1.53196
1183	72.9262	67.8509	65.1065	4.31198	10.9848	0.298378	0.15445	1.80948	1.46343
1182	72.9243	67.9297	65.1207	4.26585	11.1637	0.247998	0.231062	1.8679	1.48249
1181	72.8989	67.9846	65.1682	4.26395	11.1723	0.258682	0.166113	1.89136	1.57469
1180	72.9475	67.9874	65.2717	4.26141	11.0323	0.241343	0.108188	1.86572	1.5546
1179	73.0627	68.0338	65.3082	4.21187	11.135	0.241741	0.150081	1.86506	1.55868
1178	73.0512	68.0531	65.3211	4.24117	11.0641	0.201743	0.141083	1.88193	1.56124
1177	73.0157	68.0418	65.3562	4.28246	10.9407	0.287881	0.07636	1.82386	1.60511
1176	73.0753	68.1028	65.375	4.26727	11.0218	0.278545	0.171609	1.84288	1.5378
1175	73.1602	68.1501	65.4783	4.20189	11.0208	0.249258	0.139676	1.84442	1.51686
1174	73.2338	68.2839	65.5193	4.20429	10.9843	0.258571	0.130292	1.73542	1.47996
1173	73.249	68.3088	65.5117	4.16273	11.0194	0.277125	0.211273	1.85884	1.51358
1172	73.1607	68.3234	65.5302	4.26727	10.9824	0.255647	0.200513	1.78002	1.50718
1171	73.2095	68.3249	65.5552	4.25724	10.9125	0.290017	0.150176	1.80559	1.4456
1170	73.2427	68.3332	65.6033	4.10907	10.8649	0.277641	0.123996	1.74518	1.47907
1169	73.279	68.467	65.6693	4.12181	10.8908	0.227141	0.196691	1.73364	1.40427
1168	73.2332	68.4669	65.7254	4.16848	10.8413	0.286391	0.132405	1.83164	1.47502
1167	73.2196	68.518	65.679	4.14054	10.8408	0.22578	0.198266	1.79838	1.48951
1166	73.3064	68.6103	65.7178	4.13724	10.8572	0.232897	0.122981	1.6841	1.55371
1165	73.3077	68.6126	65.8022	4.13452	10.8827	0.251909	0.229523	1.76327	1.53228
1164	73.2841	68.6232	65.7185	4.23455	10.751	0.153205	0.118398	1.72737	1.38542
1163	73.2956	68.6255	65.7822	4.25157	10.7301	0.181548	0.185753	1.77718	1.39854
1162	73.2643	68.6873	65.7529	4.12972	10.8043	0.175779	0.243661	1.74747	1.48572
1161	73.3297	68.6998	65.843	4.07078	10.7211	0.211541	0.133754	1.76254	1.48773
1160	73.4327	68.8176	65.9052	4.06795	10.7505	0.202238	0.182973	1.67561	1.4037
1159	73.3682	68.8254	65.8848	4.11737	10.7251	0.125768	0.166869	1.68951	1.5189
1158	73.4167	68.9146	66.0278	4.16788	10.7623	0.216252	0.151778	1.64226	1.49714
1157	73.4004	68.9283	65.9996	4.18498	10.7023	0.25169	0.114662	1.67127	1.49645
1156	73.4246	69.0115	66.0449	4.12122	10.6487	0.2964	0.035499	1.64434	1.4695
1155	73.4982	69.0463	66.1128	4.09882	10.6655	0.288114	0.155187	1.68544	1.57833
1154	73.4903	69.0587	66.0336	4.07733	10.6063	0.251881	0.233368	1.74347	1.57184
1153	73.4278	69.0728	66.0648	4.14213	10.6443	0.202831	0.235831	1.81226	1.43841
1152	73.4531	69.1043	66.1356	4.11029	10.5413	0.172589	0.111622	1.65625	1.34685
1151	73.422	69.078	66.1488	4.11366	10.4973	0.212628	0.194741	1.68706	1.57773
1150	73.5262	69.2748	66.2148	4.11029	10.592	0.132008	0.143403	1.69267	1.48153
1149	73.5189	69.2178	66.1933	4.07129	10.6233	0.155059	0.215532	1.71167	1.42025
1148	73.481	69.1563	66.1877	4.10891	10.6254	0.216253	0.104524	1.66673	1.42393
1147	73.4936	69.2515	66.2483	4.17591	10.586	0.205585	0.167277	1.74993	1.41802
1146	73.5537	69.2972	66.242	4.08664	10.5432	0.165745	0.26366	1.67203	1.33981
1145	73.577	69.4041	66.3341	4.04983	10.4886	0.15916	0.155605	1.62934	1.372
1144	73.5712	69.498	66.3426	3.97483	10.5382	0.161021	0.15245	1.6734	1.4036
1143	73.5503	69.4959	66.4269	4.03213	10.4719	0.253597	0.065062	1.63813	1.3017
1142	73.5769	69.5627	66.4347	3.9882	10.3962	0.233656	0.240587	1.67636	1.34484
1141	73.5889	69.5474	66.4789	3.97718	10.4302	0.185609	0.262733	1.59891	1.3587
1140	73.7213	69.6265	66.6314	4.04703	10.4848	0.134463	0.286612	1.57773	1.34126
1139	73.6817	69.6729	66.6398	4.09025	10.3664	0.14137	0.157584	1.58431	1.53303
1138	73.6702	69.6999	66.5266	3.90565	10.3669	0.076365	0.088653	1.67003	1.39906
1137	73.5718	69.7449	66.564	4.06245	10.4455	0.165357	0.170365	1.57608	1.37749
1136	73.4745	69.6877	66.5524	4.07181	10.3307	0.24824	0.263185	1.59515	1.36423
1135	73.6505	69.8357	66.7196	3.94833	10.3892	0.244405	0.111101	1.52111	1.37616
1134	73.6539	69.9768	66.7894	3.94649	10.2894	0.209519	0.147527	1.53062	1.39073
1133	73.7523	70.0076	66.7795	3.99655	10.4027	0.294208	0.042212	1.53245	1.39717
1132	73.7538	69.9423	66.8316	3.97995	10.2452	0.227415	0.049889	1.63998	1.2649
1131	73.715	70.0077	66.8606	3.97367	10.2026	0.25819	0.153366	1.48503	1.2833
1130	73.6365	69.9852	66.7842	3.98637	10.1805	0.196073	0.194708	1.42431	1.29277
1129	73.692	70.0562	66.8783	3.92021	10.2365	0.189661	0.132354	1.56587	1.36838
1128	73.6518	70.1025	66.876	3.90385	10.2401	0.198871	0.048195	1.51304	1.38782
1127	73.5797	70.1283	66.8691	3.89117	10.2543	0.141737	0.134646	1.62238	1.40664
1126	73.6884	70.1377	66.8943	3.9969	10.3007	0.113532	0.206522	1.53364	1.34121
1125	73.8051	70.2332	66.9656	4.03482	10.1131	0.098069	0.158691	1.52393	1.28098
1124	73.719	70.2619	66.9543	4.01776	10.1306	0.379703	0.141513	1.53282	1.308
1123	73.718	70.2587	67.0448	3.95881	10.3079	0.168885	0.043903	1.69894	1.4078
1122	73.6984	70.3403	67.1001	3.9039	10.2077	0.191454	0.223545	1.51045	1.44645
1121	73.6788	70.3319	67.0124	3.85994	10.1404	0.176865	0.313013	1.55198	1.27577
1120	73.7532	70.4995	67.0759	3.90254	10.1382	0.07401	0.109197	1.58831	1.1798
1119	73.6873	70.4218	67.0916	3.76423	10.1431	0.208871	0.153766	1.58977	1.24977
1118	73.7272	70.4449	67.1588	3.93406	10.0511	0.185212	0.153148	1.53157	1.25806
1117	73.6802	70.5099	67.16	3.91671	10.0989	0.244834	0.177945	1.52062	1.26389
1116	73.6955	70.6491	67.2817	3.82343	10.1052	0.177853	0.06707	1.44391	1.35748
1115	73.5858	70.5904	67.3359	3.72281	10.0713	0.140982	0.120738	1.46528	1.32902
1114	73.6302	70.6262	67.2292	3.86495	9.97468	0.113178	0.240617	1.64526	1.34869
1113	73.5014	70.6138	67.2264	3.80277	9.95134	0.316777	0.079058	1.54594	1.43884
1112	73.6521	70.7554	67.4291	3.80995	10.0737	0.237548	0.144456	1.51038	1.22328
1111	73.7431	70.7542	67.4171	3.80635	10.0671	0.165928	0.217604	1.43305	1.10401
1110	73.6109	70.8288	67.4347	3.86951	9.90549	0.116661	0.273177	1.40965	1.28254
1109	73.7382	70.8393	67.4277	3.93256	10.0239	0.059306	0.08074	1.46186	1.23362
1108	73.6937	70.8701	67.3924	3.80523	9.92104	0.128169	0.049743	1.43074	1.35585
1107	73.6136	70.9363	67.4261	3.78159	9.92855	0.243502	0.168809	1.42725	1.20526
1106	73.6012	70.9841	67.5218	3.77986	9.84452	0.20978	0.186078	1.45884	1.32897
1105	73.7151	71.1312	67.5997	3.78071	9.94824	0.098012	0.017606	1.55811	1.29511
1104	73.6731	71.0229	67.5064	3.86854	9.87444	0.27921	0.262594	1.45625	1.23988
1103	73.5672	71.0237	67.5891	3.80572	9.95393	0.300222	0.144531	1.32301	1.19608
1102	73.7398	71.1878	67.5908	3.83216	9.82793	0.219634	0.344685	1.4171	1.25033
1101	73.6665	71.1619	67.7068	3.81203	9.8745	0.170509	0.133887	1.45019	1.14761
1100	73.5773	71.2246	67.7484	3.67816	9.96181	0.299371	0.120619	1.41569	1.35139
1099	73.6641	71.2072	67.7718	3.76329	9.77342	0.298049	0.186247	1.42269	1.2563
1098	73.6267	71.2399	67.7182	3.78094	9.83208	0.173898	0.112575	1.48942	1.22626
1097	73.6225	71.4458	67.8428	3.85482	9.73622	0.183598	0.155945	1.40015	1.16324
1096	73.6447	71.3429	67.7779	3.79887	9.71523	0.188334	0.196491	1.22227	1.26396
1095	73.6036	71.4787	67.82	3.75318	9.78691	0.16947	0.190768	1.44548	1.36365
1094	73.5896	71.4101	67.7669	3.60243	9.83373	0.163475	0.144989	1.32764	1.22425
1093	73.6555	71.5658	67.8977	3.67544	9.72651	0.367056	0.174021	1.4234	1.28343
1092	73.5248	71.5619	67.9652	3.82141	9.74695	0.22164	0.210046	1.40031	1.19126
1091	73.5121	71.4583	67.9202	3.67862	9.73529	0.173772	0.178206	1.42963	1.29514
1090	73.5581	71.5465	67.8607	3.77693	9.6446	0.07516	0.180203	1.2214	1.03114
1089	73.4788	71.6408	68.0018	3.815	9.77708	0.267598	0.170644	1.44834	1.26883
1088	73.5678	71.6709	68.019	3.76276	9.73106	0.179127	0.0259	1.3516	1.27137
1087	73.4937	71.7437	68.1013	3.73384	9.71057	0.165162	0.127786	1.40175	1.12817
1086	73.5759	71.7476	68.1614	3.749	9.59443	0.071446	0.13837	1.32084	1.10307
1085	73.5254	71.707	68.0695	3.54913	9.70112	0.282069	0.089655	1.33244	1.1844
1084	73.4488	71.7982	68.0608	3.74677	9.6001	0.280976	0.097153	1.37433	1.26227
1083	73.466	71.6832	68.0608	3.71081	9.45553	0.292671	0.221109	1.34601	1.11776
1082	73.4105	71.8792	68.1791	3.73553	9.51737	0.046971	0.277121	1.28642	1.19193
1081	73.4895	71.9415	68.1694	3.60055	9.59373	0.211685	0.153592	1.2712	1.11209
1080	73.3551	71.8456	68.1206	3.75646	9.61785	0.14336	0.081442	1.41679	1.10946
1079	73.495	72.0364	68.2855	3.74842	9.62702	0.153015	0.147776	1.32809	1.34227
1078	73.4442	72.0594	68.1877	3.7472	9.53891	0.324127	0.35756	1.38642	1.08226
1077	73.3062	71.9572	68.2315	3.80476	9.53896	0.251651	0.013459	1.22258	1.19792
1076	73.3962	72.068	68.3966	3.52542	9.51784	0.074698	0.069368	1.31403	1.08605
1075	73.4221	72.1556	68.3846	3.72056	9.46904	0.133284	0.190935	1.35416	1.04847
1074	73.3658	72.0944	68.3918	3.64234	9.43969	0.31671	0.242949	1.31333	1.23145
1073	73.266	72.1136	68.339	3.70096	9.30866	0.143209	0.122454	1.42911	1.22246
1072	73.1758	72.1886	68.3933	3.71071	9.55072	0.228232	0.112582	1.24815	1.20999
1071	73.2434	72.2379	68.5118	3.61262	9.45514	0.285228	0.025774	1.23139	1.14109
1070	73.1711	72.2185	68.4847	3.67328	9.46771	0.236354	0.139611	1.35947	1.14983
1069	73.2937	72.3614	68.5885	3.59606	9.51382	0.226108	0.134943	1.36965	1.053
1068	73.1668	72.3124	68.5689	3.61341	9.40361	0.182944	0.20721	1.44839	1.16884
1067	73.1442	72.4681	68.5562	3.72994	9.48406	0.086802	0.174324	1.34502	0.999615
1066	73.1146	72.4145	68.599	3.60531	9.21891	0.177198	0.097202	1.24579	1.12355
1065	73.0392	72.4525	68.545	3.57494	9.31654	0.210958	0.144184	1.30675	1.21682
1064	73.1426	72.5222	68.6795	3.6628	9.27362	0.270871	0.145354	1.22163	1.26022
1063	73.1017	72.3979	68.6276	3.60345	9.2731	0.105006	0.115363	1.32753	1.16696
1062	73.0155	72.5595	68.6124	3.58567	9.30864	0.27291	0.105146	1.34194	1.20435
1061	73.0176	72.6111	68.5945	3.68928	9.28064	0.189161	0.171056	1.24856	1.24711
1060	72.9072	72.5115	68.5964	3.66237	9.33358	0.247572	0.155959	1.35206	1.16091
1059	72.8844	72.6647	68.7783	3.61895	9.26585	0.166043	-0.035799	1.26682	1.15169
1058	72.9173	72.7034	68.7238	3.57889	9.17166	0.184529	0.062859	1.20528	1.09018
1057	72.9373	72.8165	68.7514	3.49633	9.25542	0.106954	0.11747	1.26476	1.19007
1056	72.8872	72.7724	68.7573	3.64273	9.19797	0.248832	0.12536	1.27563	1.1482
1055	72.7678	72.6841	68.7642	3.50339	9.15	0.157301	0.146701	1.29282	1.06832
1054	72.7508	72.6837	68.6362	3.56643	9.23447	0.17593	0.082346	1.38434	1.17586
1053	72.7703	72.7764	68.8692	3.64162	9.18849	0.293116	0.147232	1.19458	1.13139
1052	72.7045	72.7171	68.7924	3.57862	9.24109	0.197734	0.188031	1.19593	1.20096
1051	72.7923	72.8966	68.9531	3.62271	9.24745	0.200483	0.10141	1.23445	1.08413
1050	72.6947	72.8037	68.8649	3.51489	9.13141	0.007633	0.064208	1.13104	1.02948
1049	72.6698	73.0099	68.9186	3.51194	9.12225	0.140032	0.06575	1.14307	1.15448
1048	72.6316	72.9511	68.9673	3.52022	9.10275	0.195289	0.116545	1.22121	1.0612
1047	72.4241	72.8713	68.8319	3.50585	9.25406	0.168921	0.165418	1.23579	1.19313
1046	72.5353	72.9082	68.9553	3.58072	9.08	0.205515	0.091539	1.25337	1.14505
1045	72.5525	72.9658	68.9172	3.56514	9.14468	0.228895	0.049888	1.2665	1.06264
1044	72.5767	73.1358	69.0295	3.60316	9.02977	0.169194	0.050983	1.15833	0.881334
1043	72.5384	73.1111	68.9693	3.50189	9.12189	0.109725	0.211203	1.23826	1.0614
1042	72.3949	73.1421	68.9702	3.56777	9.06641	0.178128	0.21248	1.26116	1.1268
1041	72.3656	73.1479	68.9929	3.45058	9.02851	0.154584	0.200914	1.10243	1.02697
1040	72.2724	73.1618	68.9841	3.53642	9.10563	0.236675	0.11135	1.215	1.15408
1039	72.3177	73.1755	69.0556	3.50738	9.0895	0.31286	0.051233	1.26729	1.13966
1038	72.3402	73.2933	69.1349	3.53165	9.06283	0.130441	0.037243	1.13726	0.95534
1037	72.3861	73.3316	69.1897	3.51741	9.02337	0.08943	0.189334	1.17065	1.04147
1036	72.2926	73.284	69.1029	3.51138	9.05697	0.169525	0.110334	1.08725	1.03145
1035	72.1868	73.2877	69.0907	3.47948	8.90971	0.070024	0.172154	1.08265	1.09159
1034	72.1445	73.2958	69.1668	3.46258	9.07331	0.065796	0.186915	1.10797	1.04316
1033	72.0811	73.331	69.2205	3.4599	9.05694	0.174188	0.140243	1.20806	0.967411
1032	72.0795	73.3486	69.2539	3.4075	9.04398	0.116406	0.088801	1.18854	1.1604
1031	71.9849	73.3087	69.1767	3.47633	8.93866	0.069421	0.177529	1.0909	1.05123
1030	71.9947	73.4597	69.212	3.58528	8.94354	0.089773	-0.01849	1.10282	0.914877
1029	71.9479	73.3773	69.2578	3.50184	8.88565	0.140709	-8.9e-05	1.14407	0.986483
1028	71.9313	73.3592	69.2118	3.45501	8.85253	0.211286	0.094262	1.14748	1.02679
1027	71.8826	73.3934	69.1607	3.44365	8.99143	0.198602	0.128323	1.16795	1.01971
1026	71.8604	73.4376	69.2234	3.50614	8.98012	0.123632	0.093192	1.07984	1.06618
1025	71.829	73.5097	69.2615	3.49104	8.90643	0.122989	0.039153	1.09298	1.00531
1024	71.6709	73.5337	69.2046	3.43102	8.87717	0.084695	0.087904	1.107	1.04994
1023	71.6797	73.5203	69.2167	3.51018	8.7901	0.221592	0.225158	1.12445	1.08363
1022	71.6896	73.5825	69.2958	3.56693	8.9222	0.138595	0.21685	1.10332	1.06821
1021	71.6691	73.5606	69.3057	3.42038	8.84343	0.14243	0.09635	1.03231	1.04942
1020	71.5781	73.5273	69.279	3.44423	8.81269	0.169445	0.057462	1.00215	1.03609
1019	71.4428	73.5176	69.2414	3.47879	8.7973	0.178103	0.140345	1.01991	0.998088
1018	71.5465	73.707	69.3485	3.46925	8.84186	0.148158	0.21823	1.15642	1.13255
1017	71.461	73.68	69.3813	3.39484	8.76953	0.231198	0.143131	1.1108	1.01837
1016	71.3863	73.6231	69.3148	3.3918	8.80733	0.181046	-0.003911	1.1109	1.06921
1015	71.2924	73.5412	69.3623	3.50829	8.68309	0.163654	0.028268	1.13233	1.04726
1014	71.2517	73.5756	69.3825	3.50491	8.70175	0.207394	0.097832	1.03022	1.11437
1013	71.2946	73.6702	69.4105	3.54449	8.7825	0.074523	0.13963	1.1213	1.05797
1012	71.2271	73.7025	69.4213	3.43457	8.7443	0.173038	0.125095	1.14761	0.977412
1011	71.1756	73.7596	69.3768	3.4392	8.74166	0.044733	0.142986	1.09773	1.03099
1010	71.2171	73.8486	69.461	3.43002	8.74425	0.169574	0.135216	1.0613	1.06104
1009	71.0368	73.7158	69.4376	3.46252	8.75466	0.207629	0.156964	1.05979	1.02829
1008	70.9471	73.6573	69.381	3.43368	8.73069	0.124766	0.164847	1.06109	0.916723
1007	70.9444	73.6122	69.3263	3.43649	8.64741	0.202683	0.172538	1.04214	0.9463
1006	70.8916	73.8065	69.4086	3.47255	8.80577	0.175334	0.101495	1.01513	0.972138
1005	70.8536	73.7759	69.4122	3.48961	8.64935	0.192267	0.132106	1.04799	1.00041
1004	70.7297	73.7533	69.4225	3.39377	8.69319	0.200759	0.247626	1.03303	0.931234
1003	70.6669	73.7972	69.48	3.32559	8.67747	0.150612	0.129185	1.10245	1.01479
1002	70.6463	73.8822	69.4765	3.41924	8.63781	0.17121	0.045567	0.99576	1.01071
1001	70.63	73.8581	69.5254	3.41278	8.65012	0.216732	0.205232	1.03218	0.983964
1000	70.6183	73.9241	69.5491	3.47764	8.67932	0.175576	0.195566	1.03267	0.99154
999	70.5621	73.9361	69.4947	3.40708	8.54865	0.05648	0.15185	1.05641	0.94398
998	70.4326	73.9142	69.4782	3.40854	8.56756	0.129376	0.179095	1.06812	0.948901
997	70.2665	73.7137	69.3602	3.36693	8.6217	0.160481	0.205197	0.978972	0.953168
996	70.2681	73.7605	69.3712	3.42416	8.58165	0.197646	0.13762	0.9591	0.97649
995	70.1903	73.8216	69.4476	3.44125	8.56691	0.177151	0.102816	1.02666	1.01202
994	70.1559	73.8721	69.4193	3.47599	8.61289	0.12499	0.121021	1.07966	0.956081
993	70.1535	73.8606	69.3238	3.44482	8.55703	0.123077	0.106678	1.06334	0.928541
992	70.0704	73.9364	69.4099	3.35337	8.4942	0.14748	0.079114	0.933953	0.972365
991	69.9978	73.9406	69.4461	3.34014	8.50962	0.155781	0.085116	0.927904	0.975043
990	69.8943	73.8413	69.379	3.43278	8.56829	0.19745	0.137361	0.948308	0.851125
989	69.803	73.8686	69.3898	3.43067	8.60918	0.149259	0.240224	0.971813	0.905505
988	69.8334	73.9367	69.4683	3.31663	8.51881	0.141845	0.081393	1.05741	0.937037
987	69.7939	73.9444	69.4341	3.34255	8.44894	0.129793	-0.008788	1.04546	0.983686
986	69.6746	73.8673	69.4169	3.38988	8.52934	0.068295	0.145292	1.08507	0.942332
985	69.6678	73.9107	69.4352	3.35202	8.47921	0.119985	0.191747	1.0254	0.975864
984	69.6282	73.9058	69.4043	3.36363	8.42671	0.179676	0.113054	1.01907	0.983697
983	69.5136	73.933	69.4189	3.31814	8.57969	0.166346	0.05422	0.894634	0.867787
982	69.431	73.8803	69.3915	3.31464	8.47136	0.083342	0.033249	0.833156	0.85465
981	69.3728	73.8949	69.457	3.43169	8.44136	0.08515	0.07603	0.932528	0.964799
980	69.3326	73.9072	69.3599	3.47535	8.43399	0.112139	0.103115	1.0245	0.88406
979	69.2841	73.8701	69.4288	3.43539	8.46551	0.126024	0.067172	0.939003	0.952403
978	69.2127	73.9444	69.4842	3.36455	8.49095	0.198775	0.097636	0.995189	0.839759
977	69.1318	73.9564	69.3886	3.33249	8.39095	0.168143	0.149237	0.984	0.814019
976	69.0795	73.93	69.3804	3.29107	8.38882	0.191641	0.124786	1.0269	0.933442
975	69.0337	73.894	69.3886	3.34367	8.34808	0.166453	0.093154	1.00012	0.992159
974	68.9724	73.864	69.3112	3.42649	8.31352	0.170284	0.101751	0.930533	0.916896
973	68.906	73.9052	69.3153	3.40562	8.41805	0.093955	0.126438	1.04215	0.900871
972	68.8831	73.9264	69.3521	3.3589	8.47611	0.150576	0.114197	1.01739	0.934424
971	68.7831	73.895	69.3411	3.37402	8.45562	0.211819	0.184786	1.02282	0.889308
970	68.6106	73.8753	69.3026	3.37325	8.46695	0.13678	0.127894	0.959554	0.872607
969	68.5911	73.8852	69.3146	3.36831	8.35784	0.156716	0.082757	1.02724	0.89134
968	68.5666	73.8284	69.2996	3.34984	8.26401	0.11109	0.07731	0.983439	0.887411
967	68.4533	73.7903	69.2567	3.36812	8.34083	0.113112	0.142086	0.926297	0.929952
966	68.3725	73.8313	69.2462	3.39056	8.31431	0.099925	0.162193	0.967763	0.892885
965	68.2871	73.8092	69.2351	3.39663	8.33351	0.103081	0.132458	0.987177	0.910779
964	68.21	73.8324	69.2597	3.34964	8.36128	0.143159	0.100072	0.96502	0.890139
963	68.1429	73.8543	69.2373	3.35024	8.34059	0.233278	0.056063	0.931896	0.807967
962	68.1031	73.7896	69.2004	3.34057	8.28024	0.184416	0.161678	0.825836	0.792511
961	68.0804	73.748	69.1873	3.34695	8.25626	0.110892	0.133694	0.86962	0.881931
960	67.9797	73.7666	69.1398	3.35636	8.29763	0.147989	0.019495	0.958291	0.843573
959	67.941	73.7929	69.2106	3.31985	8.28532	0.159223	0.093472	0.980892	0.745003
958	67.8218	73.7443	69.1938	3.37788	8.23426	0.158812	0.19092	0.883633	0.833783
957	67.6737	73.6976	69.1631	3.4366	8.15591	0.119762	0.190408	0.916068	0.938551
956	67.6238	73.7038	69.1465	3.3962	8.17724	0.150446	0.1022	0.929481	0.893426
955	67.5841	73.6635	69.0426	3.34167	8.21966	0.24517	0.076885	0.906903	0.885738
954	67.4884	73.6194	68.9678	3.26905	8.24153	0.215118	0.130469	0.97817	0.932178
953	67.4193	73.6115	68.9828	3.31357	8.23518	0.09952	0.149539	0.982178	0.811511
952	67.3593	73.634	69.0203	3.33089	8.22699	0.072559	0.17433	0.944295	0.816758
951	67.2802	73.6319	69.0396	3.34517	8.19496	0.198564	0.110351	0.8978	0.871354
950	67.1983	73.5839	69.0161	3.40497	8.20674	0.211046	0.095195	0.869662	0.82611
949	67.048	73.5397	68.9385	3.34201	8.22694	0.145361	0.130825	0.811785	0.826149
948	67.0615	73.5974	68.9805	3.30902	8.23976	0.111742	0.080884	0.75864	0.856543
947	67.0572	73.6034	68.9598	3.27147	8.17014	0.120402	0.042081	0.850717	0.875622
946	66.9946	73.5359	68.9036	3.23975	8.18542	0.223549	0.069398	0.958963	0.806613
945	66.876	73.4587	68.9045	3.37028	8.18972	0.280593	0.138497	0.871946	0.774672
944	66.7693	73.4356	68.8863	3.34053	8.15884	0.209415	0.079451	0.837916	0.82182
943	66.6851	73.454	68.8572	3.34194	8.22785	0.101037	0.089649	0.935108	0.855563
942	66.5957	73.4368	68.8567	3.40168	8.27804	0.004194	0.153649	0.942266	0.891592
941	66.5193	73.4025	68.7826	3.31612	8.18022	0.06944	0.099628	0.849362	0.87955
940	66.4701	73.4268	68.7743	3.30508	8.13738	0.185713	0.084912	0.875518	0.795988
939	66.4359	73.4141	68.8325	3.35271	8.15466	0.205888	0.140386	0.890673	0.764616
938	66.3751	73.418	68.8228	3.38673	8.1952	0.14977	0.214979	0.837243	0.817723
937	66.2649	73.3579	68.7767	3.35293	8.1875	0.131531	0.118838	0.852565	0.877014
936	66.1477	73.2487	68.7387	3.29761	8.10512	0.127165	0.018142	0.791439	0.819035
935	66.0926	73.2219	68.6879	3.33405	8.15637	0.127135	0.062759	0.797896	0.817822
934	66.045	73.2213	68.6175	3.38153	8.18144	0.108621	0.075363	0.898056	0.799983
933	65.9218	73.2206	68.6244	3.32649	8.17994	0.128007	0.117559	0.900977	0.778576
932	65.8358	73.1626	68.6022	3.26016	8.13402	0.207239	0.118047	0.854416	0.8175
931	65.7301	73.1197	68.5554	3.29911	8.08062	0.136227	0.02238	0.78786	0.83406
930	65.6512	73.1289	68.571	3.37289	8.16001	0.114193	0.070006	0.760753	0.837785
929	65.6246	73.1133	68.5411	3.382	8.21405	0.166426	0.112869	0.814786	0.800741
928	65.5875	73.0531	68.4546	3.36773	8.16627	0.141633	0.137659	0.857492	0.808026
927	65.5577	73.0802	68.5091	3.31897	8.12431	0.117092	0.107461	0.873377	0.881319
926	65.3809	72.998	68.4566	3.37241	8.06406	0.160068	0.109667	0.887805	0.826513
925	65.199	72.919	68.3372	3.34189	8.0145	0.18939	0.121341	0.880586	0.776447
924	65.1656	72.8761	68.302	3.32699	8.07736	0.142117	0.12729	0.862559	0.793649
923	65.1613	72.8132	68.2646	3.32795	8.09105	0.051756	0.125056	0.87581	0.787362
922	65.1084	72.8146	68.2774	3.28716	8.11916	0.095096	0.071217	0.795074	0.774978
921	64.9658	72.7404	68.2333	3.29463	8.11274	0.191237	0.106457	0.749235	0.906022
920	64.806	72.6786	68.1343	3.35463	8.05318	0.180456	0.076127	0.83958	0.869376
919	64.735	72.7307	68.0905	3.3818	8.01899	0.093385	0.117108	0.865695	0.744815
918	64.7075	72.6832	68.1435	3.40286	8.05981	0.062514	0.191977	0.805483	0.736358
917	64.6021	72.5887	68.0812	3.36772	8.12542	0.074611	0.071182	0.74143	0.849416
916	64.4664	72.5097	67.9664	3.2751	8.13444	0.124721	0.042967	0.806508	0.854406
915	64.4524	72.5434	68.025	3.28124	8.06925	0.135034	0.078833	0.837179	0.731456
914	64.3992	72.5239	67.9815	3.39913	8.04656	0.066511	0.038638	0.884581	0.751477
913	64.3496	72.5068	67.8901	3.40904	8.05132	0.096405	0.142523	0.910262	0.798596
912	64.2147	72.4262	67.8428	3.31204	8.03275	0.142424	0.190037	0.880764	0.802851
911	64.0501	72.3029	67.8191	3.33324	8.06146	0.123789	0.139418	0.857627	0.809159
910	63.979	72.267	67.8099	3.32784	7.99089	0.078273	0.105278	0.777742	0.769682
909	63.9825	72.3075	67.8301	3.29733	7.99275	0.146408	0.090966	0.764741	0.842593
908	63.8898	72.2052	67.7847	3.36327	8.02455	0.174049	0.082676	0.829821	0.922023
907	63.8243	72.1656	67.6738	3.43088	8.05028	0.209307	0.123531	0.837808	0.826548
906	63.7223	72.1669	67.644	3.49481	8.07127	0.144104	0.123258	0.834512	0.768085
905	63.6824	72.1246	67.5618	3.3973	8.07074	0.141317	0.128515	0.812632	0.715833
904	63.6017	72.0502	67.5627	3.31693	7.95423	0.112931	0.13621	0.800917	0.711513
903	63.5241	71.9642	67.525	3.26299	8.01929	0.093351	-0.00668	0.754971	0.776577
902	63.3476	71.8964	67.4446	3.43234	8.06108	0.083107	0.011366	0.74442	0.770283
901	63.3149	71.9757	67.5002	3.36062	8.01445	0.126692	0.135577	0.823168	0.783597
900	63.1862	71.8903	67.3806	3.32782	8.00927	0.23877	0.265062	0.87086	0.857221
899	63.0832	71.8375	67.3087	3.41156	7.97627	0.292687	0.148025	0.817914	0.752927
898	62.9306	71.7377	67.2576	3.38142	7.95396	0.169313	0.123808	0.799501	0.773838
897	62.9048	71.7051	67.2287	3.33758	7.93088	0.1433	0.173434	0.772265	0.778734
896	62.8738	71.5795	67.1502	3.299	8.00033	0.116311	0.136842	0.716517	0.776881
895	62.8414	71.5855	67.1571	3.31228	8.00154	0.008495	0.092464	0.784718	0.745429
894	62.7429	71.5774	67.1182	3.37789	8.03971	0.038601	0.01877	0.77537	0.728445
893	62.6251	71.4652	66.9995	3.37415	7.98807	0.151361	0.131707	0.860214	0.813485
892	62.5827	71.4058	66.9572	3.45432	7.88835	0.187512	0.188979	0.862052	0.78141
891	62.4757	71.422	66.9299	3.34536	7.98633	0.077676	0.105383	0.822101	0.718668
890	62.412	71.3535	66.844	3.36342	8.01083	0.082017	0.025336	0.845262	0.753825
889	62.2721	71.1954	66.7531	3.3478	7.96908	0.106253	0.082083	0.807445	0.811582
888	62.2478	71.1403	66.7401	3.35324	8.01984	0.154725	0.105877	0.830735	0.751104
887	62.1549	71.089	66.7458	3.37878	8.00609	0.138154	0.037208	0.787751	0.686158
886	62.0249	71.0371	66.6858	3.43176	7.95746	0.157477	0.097524	0.871495	0.725411
885	61.9479	70.9668	66.6247	3.50256	7.91621	0.127913	0.165601	0.790076	0.689198
884	61.7924	70.9063	66.5194	3.35327	7.93311	0.235194	0.141181	0.715984	0.743397
883	61.7314	70.8158	66.4602	3.3547	7.91887	0.137552	0.125721	0.737906	0.720118
882	61.6968	70.803	66.4513	3.42596	7.96162	0.210555	0.092535	0.750007	0.707478
881	61.6032	70.6996	66.3616	3.44493	7.91022	0.188438	0.084187	0.710895	0.80383
880	61.4897	70.6567	66.262	3.27722	7.93426	0.136725	0.069566	0.76362	0.784241
879	61.3921	70.5766	66.2163	3.33791	7.94146	0.23276	0.169986	0.728467	0.758733
878	61.3081	70.4938	66.0959	3.55686	7.99371	0.148066	0.175968	0.743846	0.70699
877	61.2889	70.4117	66.175	3.44035	7.93909	0.106415	0.148997	0.7779	0.723094
876	61.1428	70.3931	66.0609	3.44464	7.95088	0.083025	0.125296	0.768843	0.749622
875	61.0377	70.2824	65.9668	3.47097	8.00112	0.182913	0.206335	0.798175	0.743524
874	60.9943	70.2321	65.9427	3.52511	7.95747	0.161795	0.088737	0.655776	0.685142
873	60.1026	69.0901	63.9152	3.55947	7.5164	0.069591	0.029028	0.56819	0.623267
872	59.4581	68.2545	63.1817	3.55904	7.33513	0.044284	0.019247	0.559904	0.590805
871	59.4766	68.4719	63.5435	3.56162	7.34579	0.050523	0.015187	0.563268	0.599581
870	59.3943	68.5432	63.4239	3.59116	7.38909	0.055706	0.021981	0.562858	0.604712
869	59.5431	68.9189	63.4056	3.57029	7.4721	0.049807	0.023143	0.559035	0.594686
868	59.2912	68.437	63.3333	3.60358	7.3951	0.056211	0.023234	0.54847	0.60708
867	59.0447	68.4238	63.4905	3.59578	7.31867	0.05232	0.023312	0.548838	0.608279
866	59.0718	67.9128	63.2998	3.58512	7.38168	0.048009	0.02393	0.566013	0.580969
865	59.2735	67.984	63.1246	3.59452	7.39832	0.047606	0.023579	0.552612	0.589697
864	59.0775	67.9694	63.2456	3.61154	7.36771	0.051563	0.024182	0.546877	0.602978
863	58.5924	67.8625	62.9101	3.61289	7.33769	0.052571	0.020924	0.550359	0.593697
862	58.5912	67.7276	62.8802	3.60756	7.37294	0.056794	0.023342	0.547278	0.592847
861	58.7666	67.706	63.0429	3.60769	7.40883	0.051983	0.023689	0.550425	0.597507
860	58.6999	67.5378	62.8274	3.60631	7.38737	0.047837	0.023881	0.54764	0.587615
859	58.7343	67.6412	62.8097	3.60879	7.41697	0.049862	0.024672	0.53976	0.581275
858	58.5076	67.4976	62.565	3.58081	7.36427	0.047945	0.023345	0.53796	0.583246
857	58.3526	67.2549	62.5444	3.62676	7.36974	0.043894	0.019952	0.531083	0.583475
856	58.3899	67.2903	62.5691	3.62464	7.42455	0.047725	0.022606	0.534058	0.58725
855	58.3726	67.0598	62.5231	3.61061	7.38127	0.0479	0.024687	0.542078	0.590567
854	58.2323	67.2485	62.4481	3.6372	7.39919	0.050244	0.02663	0.538265	0.582624
853	58.2843	67.188	62.597	3.65266	7.39865	0.050698	0.02958	0.543547	0.592994
852	58.2113	66.9941	62.4931	3.62616	7.41769	0.047722	0.026325	0.540535	0.578845
851	58.0524	66.8575	62.4043	3.632	7.41683	0.052347	0.024629	0.536039	0.582946
850	58.0283	66.7647	62.3217	3.63581	7.43609	0.049649	0.021813	0.530566	0.58822
849	57.8545	66.5883	62.0372	3.63485	7.37884	0.049432	0.022775	0.533868	0.582715
848	57.876	66.7046	62.0631	3.64882	7.41725	0.051506	0.023006	0.534112	0.581369
847	57.7033	66.5756	61.9872	3.65431	7.40644	0.049782	0.02189	0.531718	0.578645
846	57.8239	66.6079	62.0113	3.65899	7.42365	0.050619	0.026187	0.533696	0.573123
845	57.7164	66.4403	61.9825	3.65311	7.45585	0.051177	0.025077	0.535534	0.577207
844	57.7214	66.368	61.9169	3.66865	7.44549	0.05198	0.024199	0.535738	0.569222
843	57.677	66.2837	61.8492	3.66546	7.44582	0.050021	0.025521	0.530689	0.564158
842	57.4817	66.2093	61.7871	3.67708	7.46252	0.050684	0.021763	0.533789	0.567822
841	57.3519	66.007	61.6438	3.6782	7.44185	0.049538	0.022106	0.534848	0.560894
840	57.3647	66.0236	61.5574	3.6852	7.44945	0.049522	0.022391	0.533219	0.571291
839	57.3333	65.9813	61.6279	3.6973	7.45718	0.050094	0.021542	0.531753	0.562203
838	57.3926	65.7873	61.5221	3.68453	7.4482	0.049675	0.022248	0.530592	0.559405
837	57.2117	65.7278	61.2683	3.69304	7.45565	0.047725	0.022296	0.534519	0.568182
836	57.1646	65.6637	61.4213	3.70554	7.48136	0.050375	0.020747	0.526243	0.56002
835	57.0628	65.4777	61.2542	3.71635	7.46945	0.050289	0.022188	0.531283	0.566317
834	57.124	65.5241	61.3059	3.70916	7.45273	0.05051	0.022595	0.530317	0.563043
833	56.9172	65.3476	61.0902	3.72717	7.47631	0.050064	0.021685	0.522255	0.560312
832	56.9001	65.242	61.0863	3.71641	7.46281	0.04764	0.020396	0.529938	0.562353
831	56.896	65.2876	61.0909	3.71463	7.4602	0.047671	0.022562	0.527802	0.556769
830	56.8092	65.1189	61.069	3.72417	7.50265	0.047411	0.021921	0.524721	0.55997
829	56.8315	65.0453	60.9287	3.73493	7.5038	0.049599	0.021267	0.524978	0.56001
828	56.7878	64.9688	60.822	3.74044	7.49293	0.048251	0.021356	0.526966	0.56217
827	56.7908	64.9577	60.7948	3.75471	7.49176	0.05024	0.020052	0.524127	0.555554
826	56.6838	64.854	60.696	3.76551	7.49993	0.04833	0.023254	0.524851	0.552041
825	56.6295	64.7991	60.695	3.7599	7.51718	0.046193	0.021893	0.521919	0.557677
824	56.5428	64.6833	60.5821	3.74983	7.54111	0.048222	0.021156	0.523215	0.547727
823	56.5086	64.5875	60.4658	3.77185	7.51741	0.048802	0.023378	0.526448	0.551507
822	56.41	64.4351	60.3547	3.78248	7.52324	0.047687	0.021543	0.528577	0.550339
821	56.4474	64.4715	60.3904	3.78508	7.54309	0.047262	0.022353	0.522588	0.549105
820	56.3391	64.3613	60.2517	3.80355	7.52977	0.048122	0.021209	0.522616	0.553039
819	56.222	64.1299	60.1851	3.78654	7.55007	0.049662	0.021253	0.525253	0.547309
818	56.327	64.1938	60.1968	3.81182	7.55206	0.047289	0.020026	0.524122	0.548095
817	56.3341	64.085	60.1651	3.80486	7.55083	0.047279	0.020932	0.521972	0.548173
816	56.2675	64.0608	60.0837	3.81244	7.5834	0.049077	0.020552	0.522588	0.540361
815	56.2071	63.9725	59.9867	3.7953	7.56731	0.048115	0.020725	0.521282	0.550063
814	56.1056	63.8585	59.9063	3.83919	7.56312	0.047368	0.020018	0.522949	0.54436
813	56.0774	63.7164	59.9018	3.85257	7.58218	0.047336	0.021063	0.522165	0.54587
812	56.1512	63.7399	59.8589	3.86045	7.5996	0.04734	0.019523	0.517804	0.541658
811	56.056	63.6676	59.833	3.86547	7.62708	0.048704	0.020789	0.512604	0.540813
810	56.0745	63.5748	59.7821	3.86521	7.60009	0.047362	0.021401	0.523849	0.542602
809	55.9686	63.3974	59.6854	3.86456	7.61315	0.048557	0.018319	0.525006	0.541927
808	56.1139	63.3912	59.6291	3.86165	7.62576	0.048112	0.022143	0.51981	0.548206
807	55.9344	63.3237	59.591	3.88229	7.62385	0.051279	0.02144	0.518458	0.542698
806	55.9029	63.2244	59.3847	3.89041	7.64019	0.047794	0.019767	0.518137	0.54196
805	55.9303	63.1441	59.2941	3.89887	7.63994	0.050821	0.020683	0.523203	0.537976
804	55.8238	63.0482	59.4271	3.9115	7.64075	0.047779	0.020086	0.523055	0.542846
803	55.8068	63.0502	59.2917	3.90655	7.65616	0.048777	0.021137	0.520736	0.538547
802	55.7168	62.9162	59.2246	3.93104	7.67821	0.050076	0.020297	0.52002	0.538983
801	55.7322	62.7531	59.0622	3.96125	7.66607	0.050163	0.020451	0.525193	0.539271
800	55.7073	62.7202	59.0696	3.93432	7.699	0.049868	0.020525	0.516687	0.53736
799	55.6335	62.5403	58.9715	3.93285	7.69128	0.048537	0.020082	0.515977	0.535688
798	55.6419	62.5767	58.9949	3.97012	7.6937	0.050289	0.02169	0.522495	0.531855
797	55.7175	62.531	58.9425	3.96972	7.69989	0.049492	0.020882	0.513948	0.532006
796	55.6559	62.462	58.8923	3.96672	7.70558	0.049552	0.020386	0.523425	0.535404
795	55.5512	62.2869	58.803	3.99519	7.72989	0.050282	0.019637	0.518366	0.534283
794	55.6574	62.2658	58.7264	3.98876	7.76441	0.049445	0.01951	0.521335	0.533994
793	55.6246	62.2267	58.7858	3.99251	7.73648	0.051709	0.021384	0.52164	0.529985
792	55.4915	62.1033	58.5991	3.99866	7.7503	0.050596	0.018759	0.522029	0.53593
791	55.595	62.1443	58.5914	4.01596	7.76702	0.049976	0.020917	0.515899	0.535098
790	55.6071	61.9989	58.5012	4.02438	7.78377	0.051428	0.020481	0.5228	0.531097
789	55.5953	61.9152	58.4681	4.04011	7.78687	0.049409	0.020855	0.516814	0.534605
788	55.5048	61.8205	58.3646	4.05015	7.8011	0.049528	0.020487	0.522224	0.534006
787	55.4992	61.7535	58.3815	4.05977	7.8086	0.051407	0.020638	0.527949	0.5293
786	55.5646	61.7346	58.32	4.06279	7.84873	0.052077	0.020336	0.519048	0.531204
785	55.4972	61.5831	58.2299	4.06767	7.8388	0.050524	0.021127	0.520508	0.531861
784	55.6012	61.5932	58.1418	4.07429	7.83391	0.05081	0.020173	0.526091	0.527597
783	55.5132	61.405	58.0842	4.08899	7.86701	0.051477	0.021976	0.51959	0.527342
782	55.5969	61.4596	58.0681	4.11457	7.87836	0.052452	0.020423	0.521434	0.52784
781	55.5278	61.3073	58.0533	4.12411	7.87742	0.051722	0.01998	0.520462	0.530264
780	55.496	61.2799	57.968	4.11834	7.88155	0.051881	0.020843	0.528556	0.528027
779	55.5274	61.3177	57.9937	4.13648	7.90954	0.05324	0.020239	0.522809	0.530814
778	55.4933	61.0821	57.8359	4.15271	7.91432	0.050379	0.021785	0.525045	0.532307
777	55.5403	61.0987	57.7929	4.15428	7.93405	0.050187	0.020589	0.526997	0.525331
776	55.5088	61.0092	57.7537	4.16638	7.94473	0.051256	0.019988	0.524753	0.5218
775	55.5541	60.9924	57.745	4.15792	7.95097	0.052792	0.021359	0.519361	0.523527
774	55.5462	60.8297	57.6843	4.19417	7.95899	0.050626	0.020342	0.525391	0.528503
773	55.5037	60.7663	57.5797	4.19918	7.96847	0.052874	0.021195	0.525325	0.5273
772	55.5763	60.7811	57.63	4.21603	7.99294	0.051698	0.020603	0.529522	0.528154
771	55.5472	60.662	57.5554	4.20841	8.00456	0.05124	0.020755	0.526698	0.526469
770	55.5319	60.554	57.421	4.22917	8.00784	0.051894	0.02199	0.525859	0.525327
769	55.5853	60.5844	57.4213	4.24743	8.02502	0.051351	0.020266	0.524557	0.526234
768	55.6407	60.5317	57.3948	4.2513	8.05014	0.052343	0.020343	0.525793	0.527089
767	55.6375	60.4605	57.3458	4.26108	8.04941	0.053881	0.020682	0.527436	0.527283
766	55.654	60.3652	57.3307	4.27181	8.05862	0.05318	0.020019	0.529583	0.52454
765	55.6552	60.283	57.2178	4.28638	8.07605	0.053512	0.021328	0.53359	0.526022
764	55.6777	60.1496	57.1338	4.29369	8.0953	0.051501	0.02135	0.533985	0.526485
763	55.7089	60.1275	57.0808	4.31399	8.10361	0.053905	0.020903	0.534377	0.52741
762	55.7611	60.0623	57.078	4.31756	8.11226	0.051705	0.021295	0.536123	0.52448
761	55.7345	60.0597	57.043	4.33685	8.13012	0.053856	0.020253	0.532037	0.524902
760	55.8218	59.9778	57.0064	4.35187	8.1426	0.055276	0.019961	0.533111	0.52574
759	55.8383	59.8948	56.9733	4.36729	8.15997	0.052641	0.020365	0.531637	0.52449
758	55.8351	59.8524	56.9381	4.37037	8.18409	0.055227	0.019691	0.532346	0.523808
757	55.8762	59.8416	56.9168	4.37584	8.19001	0.053836	0.021996	0.538818	0.52136
756	55.908	59.7868	56.8189	4.39892	8.2287	0.053737	0.020941	0.537451	0.521438
755	55.9526	59.7171	56.813	4.41536	8.22874	0.055446	0.020976	0.540815	0.522307
754	56.0285	59.6871	56.783	4.4215	8.25716	0.054685	0.021905	0.539364	0.520853
753	55.9875	59.6067	56.7635	4.43873	8.26597	0.056001	0.020595	0.539106	0.520439
752	56.0463	59.5663	56.6445	4.44739	8.27889	0.054498	0.02061	0.543824	0.523445
751	56.131	59.532	56.6973	4.46208	8.30587	0.05526	0.020095	0.542167	0.524623
750	56.183	59.4661	56.6572	4.48117	8.31119	0.055403	0.021047	0.544748	0.519058
749	56.2078	59.3544	56.5458	4.49442	8.33219	0.0541	0.021981	0.543788	0.519176
748	56.2131	59.3237	56.5584	4.49831	8.34164	0.056442	0.02075	0.542817	0.522997
747	56.2528	59.2624	56.5302	4.51918	8.34813	0.057097	0.021227	0.545946	0.519295
746	56.3031	59.2286	56.4597	4.53084	8.37991	0.055351	0.021939	0.54677	0.51987
745	56.3264	59.1933	56.4599	4.54281	8.38536	0.056629	0.021255	0.5455	0.522383
744	56.4094	59.1489	56.4053	4.56064	8.42799	0.055313	0.021985	0.547221	0.524537
743	56.468	59.0943	56.3901	4.57537	8.43697	0.057201	0.020829	0.548849	0.523979
742	56.5205	59.0255	56.3045	4.59202	8.43765	0.057306	0.022938	0.553931	0.524073
741	56.5689	58.9514	56.2809	4.60241	8.45912	0.056159	0.022246	0.553035	0.521845
740	56.6475	58.9215	56.2595	4.61684	8.49244	0.058132	0.020778	0.550501	0.51945
739	56.6844	58.9142	56.256	4.63168	8.51716	0.057699	0.021647	0.553245	0.521942
738	56.7701	58.8781	56.2308	4.64993	8.53587	0.05813	0.020883	0.557377	0.523325
737	56.7914	58.8098	56.1786	4.67366	8.54742	0.057865	0.021056	0.556191	0.523359
736	56.8285	58.7821	56.0963	4.68208	8.55917	0.058365	0.020834	0.557277	0.523413
735	56.9174	58.7185	56.099	4.69699	8.58029	0.057335	0.022809	0.560927	0.523042
734	56.9551	58.6615	56.0744	4.70585	8.60041	0.058372	0.022896	0.563715	0.521128
733	57.0347	58.7434	56.0916	4.72595	8.62219	0.060439	0.021736	0.564199	0.521822
732	57.1625	58.6641	56.0603	4.73609	8.63121	0.059066	0.02214	0.561011	0.522598
731	57.2242	58.5881	56.0583	4.74904	8.65468	0.05897	0.022084	0.565262	0.521015
730	57.3222	58.5108	56.026	4.77356	8.68796	0.059691	0.021777	0.567065	0.521004
729	57.387	58.5333	55.9868	4.79052	8.70774	0.059945	0.022803	0.568265	0.519917
728	57.4499	58.5154	55.9735	4.80791	8.72768	0.059949	0.022412	0.57026	0.523476
727	57.5348	58.4998	55.9268	4.82571	8.7371	0.0592	0.02219	0.5713	0.522215
726	57.6139	58.4471	55.9365	4.8463	8.75264	0.059879	0.02221	0.573445	0.521884
725	57.7008	58.4585	55.9461	4.85943	8.79084	0.061276	0.021839	0.575445	0.521397
724	57.7486	58.3742	55.8885	4.87835	8.80796	0.0616	0.022629	0.57593	0.520144
723	57.8581	58.3671	55.8547	4.88934	8.83865	0.060846	0.021619	0.579771	0.52144
722	57.9355	58.3518	55.8485	4.90447	8.85016	0.060826	0.021954	0.580088	0.521937
721	58.0323	58.3104	55.8435	4.92371	8.88125	0.062745	0.023303	0.58234	0.523768
720	58.1184	58.2622	55.876	4.94708	8.90206	0.062545	0.022056	0.584808	0.523681
719	58.2211	58.2523	55.8568	4.96896	8.92154	0.062721	0.022614	0.584422	0.525168
718	58.3047	58.2245	55.8182	4.97795	8.93986	0.063137	0.023174	0.586991	0.522041
717	58.418	58.1951	55.8178	4.99989	8.95291	0.062163	0.02272	0.588579	0.523181
716	58.4895	58.1886	55.8064	5.01628	8.98222	0.063527	0.022964	0.588632	0.524237
715	58.6007	58.1453	55.7918	5.02868	9.00731	0.063529	0.023676	0.594019	0.521572
714	58.7524	58.1632	55.8244	5.04784	9.02981	0.06455	0.02386	0.597618	0.523746
713	58.839	58.1568	55.7785	5.06975	9.04496	0.064821	0.023952	0.597859	0.524184
712	58.919	58.1366	55.7678	5.09033	9.07294	0.064101	0.023345	0.602629	0.52365
711	59.0586	58.1376	55.8337	5.11116	9.1099	0.064849	0.023992	0.602402	0.524648
710	59.1761	58.1391	55.8322	5.12878	9.14199	0.065493	0.023124	0.602818	0.521486
709	59.2955	58.1369	55.8243	5.14078	9.16787	0.06619	0.023436	0.604099	0.523816
708	59.3721	58.0835	55.7829	5.15914	9.19136	0.066098	0.024093	0.607247	0.524822
707	59.5177	58.0991	55.8174	5.17831	9.2122	0.065917	0.024431	0.60975	0.523765
706	59.6381	58.0713	55.8117	5.20408	9.23126	0.067366	0.024756	0.613276	0.522186
705	59.7748	58.0826	55.8129	5.22438	9.25424	0.067074	0.024289	0.615175	0.523573
704	59.8818	58.0635	55.8207	5.24555	9.27475	0.067099	0.025013	0.615404	0.525992
703	59.9626	58.0203	55.813	5.25903	9.2995	0.069032	0.024864	0.620807	0.526117
702	60.1374	58.047	55.8403	5.27672	9.33891	0.067868	0.023682	0.620113	0.525542
701	60.294	58.0521	55.8669	5.29799	9.36521	0.068704	0.02481	0.622311	0.524424
700	60.4233	58.0543	55.8439	5.32377	9.38283	0.068999	0.024194	0.627201	0.52605
699	60.5345	58.0921	55.8259	5.34952	9.41132	0.069574	0.024279	0.627435	0.526259
698	60.6843	58.0901	55.8648	5.36924	9.43711	0.069579	0.025077	0.632424	0.526224
697	60.8507	58.0984	55.9201	5.38591	9.46847	0.069139	0.024852	0.633163	0.527065
696	60.9927	58.1004	55.8957	5.4083	9.49194	0.070869	0.024872	0.632641	0.529327
695	61.1191	58.0936	55.9039	5.42891	9.5155	0.071472	0.024329	0.636785	0.5287
694	61.2612	58.1044	55.9508	5.44331	9.54923	0.07162	0.024804	0.640357	0.529098
693	61.4628	58.1213	55.9823	5.46695	9.57328	0.071741	0.025935	0.644635	0.527886
692	61.6142	58.1467	56.0222	5.48682	9.60516	0.072084	0.024986	0.646677	0.527336
691	61.7458	58.1381	56.0335	5.51251	9.63283	0.072992	0.025156	0.647267	0.52508
690	61.9151	58.1378	56.0541	5.53605	9.66947	0.072726	0.026213	0.64886	0.525066
689	62.0733	58.187	56.0738	5.55287	9.70795	0.074056	0.026392	0.653551	0.528471
688	62.2483	58.2376	56.1068	5.57745	9.74074	0.075134	0.027285	0.659004	0.529059
687	62.3821	58.248	56.1444	5.60508	9.76051	0.07465	0.026164	0.661609	0.528791
686	62.5327	58.237	56.1808	5.62833	9.7691	0.074909	0.02617	0.662815	0.531164
685	62.6935	58.2467	56.2358	5.65159	9.81066	0.07593	0.027152	0.66519	0.532793
684	62.8493	58.2878	56.2219	5.67678	9.84919	0.076385	0.028294	0.669832	0.533573
683	63.0226	58.3399	56.2678	5.69928	9.87398	0.076326	0.028061	0.672664	0.533962
682	63.2176	58.3779	56.3382	5.72396	9.9017	0.077319	0.027832	0.675181	0.532894
681	63.4215	58.4383	56.3835	5.7467	9.93876	0.077909	0.027521	0.679514	0.534127
680	63.5912	58.4751	56.4263	5.76708	9.97193	0.078094	0.027128	0.681096	0.535101
679	63.784	58.4896	56.4855	5.7854	10.0052	0.077806	0.028103	0.684593	0.53412
678	63.9594	58.5325	56.5059	5.8165	10.0381	0.078586	0.027642	0.689276	0.53572
677	64.1478	58.5623	56.5495	5.84475	10.0684	0.079594	0.027898	0.692144	0.537619
676	64.353	58.6192	56.6268	5.86256	10.0982	0.079776	0.028468	0.693937	0.538004
675	64.5353	58.6762	56.6759	5.88494	10.1333	0.081653	0.027754	0.696742	0.537217
674	64.7484	58.7426	56.7183	5.91246	10.1725	0.081611	0.028411	0.701099	0.536911
673	64.9365	58.7845	56.762	5.93312	10.2012	0.082312	0.028592	0.705287	0.538891
672	65.1318	58.8044	56.8327	5.95736	10.226	0.083408	0.028609	0.708526	0.538809
671	65.3499	58.8552	56.8925	5.98878	10.2669	0.083208	0.028945	0.71299	0.538996
670	65.5214	58.9003	56.9308	6.016	10.2931	0.083384	0.029112	0.716265	0.540223
669	65.7226	58.9936	57.0205	6.0439	10.3169	0.083586	0.029852	0.719029	0.541128
668	65.9536	59.0574	57.0823	6.06696	10.3572	0.08411	0.029463	0.724055	0.543162
667	66.1412	59.1018	57.1031	6.09067	10.3937	0.084724	0.029237	0.728109	0.542831
666	66.3486	59.1924	57.196	6.11854	10.4365	0.085478	0.030297	0.733268	0.541307
665	66.5869	59.2605	57.2869	6.14353	10.4709	0.087206	0.030308	0.739836	0.541582
664	66.7741	59.2994	57.3416	6.16869	10.5045	0.087672	0.030329	0.742141	0.54407
663	66.9968	59.3831	57.4181	6.19586	10.5408	0.08833	0.030252	0.743846	0.546236
662	67.2449	59.4933	57.4899	6.228	10.577	0.089265	0.030591	0.750215	0.545949
661	67.4701	59.5788	57.5726	6.24482	10.6112	0.088727	0.03052	0.755719	0.546368
660	67.6878	59.6633	57.6712	6.26748	10.6448	0.089664	0.030455	0.758944	0.548594
659	67.9156	59.734	57.7778	6.30333	10.686	0.09077	0.031445	0.762387	0.550294
658	68.1543	59.8299	57.8785	6.33602	10.7244	0.091267	0.031611	0.766045	0.550522
657	68.3854	59.9282	57.9687	6.36238	10.7595	0.091527	0.031617	0.769993	0.551107
656	68.6143	59.9951	58.0291	6.38761	10.7954	0.092239	0.031639	0.774661	0.550351
655	68.86	60.0915	58.1267	6.41124	10.8344	0.093607	0.031744	0.780195	0.551738
654	69.114	60.2058	58.2644	6.43809	10.8715	0.094177	0.032394	0.785895	0.553374
653	69.33	60.3133	58.3578	6.46875	10.9093	0.094213	0.03265	0.78968	0.552686
652	69.5705	60.4126	58.4438	6.49872	10.9539	0.094687	0.033161	0.794967	0.554063
651	69.8186	60.515	58.5781	6.52938	10.9982	0.095506	0.033244	0.798676	0.554099
650	70.0654	60.6517	58.7033	6.56377	11.047	0.097086	0.032931	0.802135	0.555518
649	70.3093	60.755	58.802	6.59962	11.0858	0.097717	0.033928	0.807856	0.557745
648	70.5629	60.8301	58.9116	6.62578	11.1189	0.098393	0.034181	0.81335	0.558293
647	70.8225	60.9548	59.0336	6.65414	11.1602	0.100052	0.034517	0.819139	0.561886
646	71.0627	61.0683	59.1382	6.68764	11.1949	0.100428	0.034779	0.82444	0.562414
645	71.2995	61.2077	59.2694	6.71806	11.2376	0.101303	0.034311	0.830558	0.562996
644	71.5501	61.3676	59.4064	6.74204	11.2788	0.1018	0.035292	0.835429	0.563854
643	71.7882	61.4746	59.5216	6.77535	11.3142	0.101771	0.035473	0.839528	0.564959
642	72.0562	61.5924	59.6758	6.80704	11.3673	0.102314	0.035084	0.847148	0.565581
641	72.3165	61.7209	59.799	6.83642	11.4143	0.103201	0.035162	0.851391	0.565364
640	72.5501	61.8483	59.9203	6.86688	11.452	0.105293	0.035587	0.855727	0.568743
639	72.8267	62.0243	60.0827	6.90293	11.4886	0.105861	0.036349	0.864939	0.571044
638	73.0777	62.1775	60.2122	6.93774	11.5309	0.106716	0.036198	0.870312	0.572718
637	73.358	62.3272	60.3539	6.95958	11.5778	0.106667	0.036618	0.874342	0.57216
636	73.6307	62.462	60.4978	6.99958	11.6203	0.10721	0.037045	0.882542	0.571706
635	73.8649	62.6229	60.6727	7.03331	11.6673	0.108211	0.036725	0.887854	0.574835
634	74.1298	62.799	60.8628	7.06747	11.7166	0.109997	0.038384	0.892089	0.577484
633	74.4109	62.9641	61.0042	7.10607	11.7692	0.111593	0.03848	0.898554	0.578104
632	74.6583	63.11	61.1682	7.14011	11.8076	0.111683	0.038319	0.906076	0.579296
631	74.9061	63.2809	61.3418	7.1723	11.8477	0.112641	0.039076	0.914151	0.579096
630	75.1714	63.4606	61.514	7.20464	11.9	0.114086	0.03893	0.920148	0.580184
629	75.429	63.6401	61.6763	7.23562	11.9494	0.11461	0.039843	0.927377	0.583955
628	75.6831	63.8352	61.849	7.27066	11.9965	0.116512	0.039603	0.933574	0.584857
627	75.9404	63.9949	62.0322	7.31053	12.0493	0.11845	0.039866	0.939973	0.584622
626	76.2266	64.1899	62.241	7.34004	12.1021	0.117825	0.041026	0.946623	0.586665
625	76.4688	64.3812	62.4457	7.37744	12.1474	0.11888	0.040885	0.953911	0.59095
624	76.6756	64.5768	62.6221	7.41598	12.1808	0.119937	0.041814	0.959908	0.59221
623	76.9515	64.7774	62.8137	7.44828	12.2294	0.121894	0.041919	0.967015	0.593443
622	77.2069	64.9691	62.9967	7.48037	12.2807	0.123788	0.042002	0.976	0.593294
621	77.4323	65.1562	63.1913	7.51884	12.3301	0.123723	0.042995	0.983373	0.59494
620	77.6196	65.3303	63.3574	7.55764	12.3794	0.124938	0.043099	0.990457	0.597877
619	77.8694	65.5618	63.5822	7.59908	12.4339	0.124779	0.043706	0.99749	0.598955
618	78.1337	65.8007	63.8249	7.62715	12.4896	0.127274	0.043632	1.00609	0.600889
617	78.3783	66.0111	64.0388	7.66282	12.5398	0.128235	0.043898	1.01353	0.602631
616	78.5897	66.1966	64.2188	7.70485	12.5825	0.128836	0.044648	1.01932	0.604555
615	78.8241	66.4226	64.439	7.73842	12.6314	0.130347	0.044328	1.02893	0.605182
614	79.0454	66.6676	64.6806	7.78039	12.6783	0.131548	0.046569	1.03837	0.606968
613	79.2456	66.8736	64.9078	7.81837	12.735	0.133141	0.046166	1.0455	0.609562
612	79.4594	67.0512	65.1325	7.85675	12.7871	0.134261	0.046266	1.0543	0.609866
611	79.717	67.3406	65.3491	7.89548	12.8426	0.136156	0.047201	1.06152	0.611381
610	79.9129	67.5912	65.6127	7.93201	12.8956	0.137001	0.046795	1.07207	0.613285
609	80.0905	67.7892	65.8223	7.96985	12.9491	0.136739	0.047149	1.07946	0.615822
608	80.2789	68.0294	66.0531	8.01348	13.0011	0.138914	0.047323	1.08711	0.619662
607	80.4952	68.2938	66.307	8.04514	13.0599	0.140085	0.04865	1.0973	0.621049
606	80.6437	68.5388	66.55	8.08709	13.1074	0.140976	0.048672	1.10673	0.621829
605	80.802	68.754	66.7969	8.13541	13.1503	0.143456	0.049197	1.11499	0.623848
604	80.9546	69.0242	67.0555	8.17266	13.2079	0.143142	0.050278	1.12463	0.625988
603	81.1255	69.2868	67.3229	8.20918	13.2649	0.145546	0.050031	1.1317	0.62841
602	81.2774	69.5085	67.5524	8.24724	13.314	0.146446	0.050801	1.14129	0.628809
601	81.4304	69.7628	67.7908	8.29137	13.3731	0.148715	0.05109	1.14973	0.633365
600	81.5801	69.9962	68.0243	8.33206	13.4199	0.149959	0.051753	1.16026	0.63536
599	81.7287	70.2955	68.2822	8.36839	13.47	0.152348	0.053268	1.17099	0.637229
598	81.8285	70.5146	68.5645	8.41135	13.5347	0.154945	0.053195	1.1799	0.640411
597	81.9504	70.7768	68.8226	8.4491	13.5888	0.154694	0.05394	1.19273	0.63974
596	82.0452	71.0711	69.0859	8.48758	13.6467	0.155733	0.054121	1.20351	0.642161
595	82.1218	71.2978	69.364	8.52612	13.6862	0.156931	0.055158	1.21381	0.645972
594	82.2249	71.5598	69.6396	8.57782	13.7448	0.158423	0.056016	1.22415	0.647882
593	82.3634	71.871	69.9043	8.62702	13.8049	0.160622	0.056114	1.23434	0.648631
592	82.41	72.1183	70.1985	8.66095	13.8555	0.162462	0.056617	1.24308	0.652919
591	82.4668	72.3921	70.4623	8.70144	13.9104	0.164921	0.056884	1.25509	0.656445
590	82.5537	72.6719	70.7412	8.74836	13.9684	0.165045	0.05806	1.26412	0.656191
589	82.5973	72.9582	71.0368	8.79506	14.017	0.166021	0.058997	1.27607	0.658851
588	82.6298	73.2167	71.3037	8.83488	14.0775	0.168778	0.059002	1.28557	0.66298
587	82.6771	73.5311	71.6322	8.878	14.148	0.169174	0.059606	1.29694	0.663975
586	82.6714	73.7797	71.8954	8.93034	14.1936	0.171483	0.059961	1.30583	0.666389
585	82.6777	74.0379	72.1513	8.97146	14.2347	0.174094	0.060388	1.31922	0.669011
584	82.7592	74.3526	72.4606	9.02573	14.2951	0.176445	0.062005	1.33224	0.671822
583	82.7048	74.6088	72.733	9.0596	14.3599	0.176936	0.06167	1.342	0.674371
582	82.6711	74.8708	72.9937	9.10623	14.4142	0.177687	0.063252	1.35741	0.677374
581	82.6353	75.1594	73.3312	9.15712	14.4807	0.180854	0.063948	1.36823	0.680035
580	82.6422	75.4884	73.6455	9.20392	14.5435	0.182852	0.063561	1.37751	0.682592
579	82.5791	75.7854	73.9253	9.23868	14.5965	0.184144	0.066242	1.39183	0.684164
578	82.5136	76.0168	74.2151	9.28267	14.648	0.186937	0.064924	1.40257	0.685991
577	82.454	76.3273	74.5122	9.33954	14.7124	0.188729	0.065968	1.41609	0.6907
576	82.3774	76.6086	74.7989	9.39265	14.7552	0.190248	0.067559	1.42624	0.693685
575	82.3282	76.8766	75.0833	9.4364	14.8261	0.191682	0.067731	1.44054	0.695078
574	82.194	77.1367	75.3781	9.47957	14.8749	0.192463	0.068826	1.45628	0.699691
573	82.103	77.4092	75.6813	9.53416	14.9432	0.196592	0.069538	1.46613	0.702054
572	81.9258	77.6699	75.9247	9.56869	14.9958	0.197769	0.070542	1.48139	0.703168
571	81.8305	77.945	76.2325	9.61901	15.0431	0.200563	0.070974	1.49312	0.707481
570	81.6625	78.1296	76.4483	9.67519	15.1003	0.202382	0.071247	1.50555	0.709132
569	81.5293	78.4616	76.7484	9.72214	15.1608	0.203953	0.073276	1.51791	0.712372
568	81.296	78.6768	77.0374	9.77642	15.2196	0.207086	0.073738	1.53187	0.714726
567	81.1757	78.9622	77.3318	9.81973	15.2854	0.206618	0.074586	1.54875	0.717601
566	81.0032	79.1887	77.5657	9.86636	15.3379	0.207919	0.075858	1.5614	0.721025
565	80.7577	79.3739	77.7992	9.92232	15.3956	0.210608	0.076113	1.57529	0.725167
564	80.5346	79.6007	78.0339	9.98085	15.4377	0.213228	0.078108	1.58954	0.728005
563	80.3462	79.8563	78.3135	10.0207	15.4985	0.216739	0.076934	1.60005	0.730835
562	80.1337	80.0969	78.6086	10.0679	15.5563	0.216423	0.078113	1.61677	0.731234
561	79.852	80.3119	78.8147	10.1216	15.6124	0.219737	0.078747	1.62989	0.731926
560	79.6468	80.5607	79.0564	10.1739	15.6696	0.220794	0.079268	1.64687	0.736708
559	79.3374	80.7387	79.2868	10.2401	15.7098	0.224812	0.080745	1.65552	0.745465
558	79.0681	80.9117	79.5493	10.2904	15.7691	0.22566	0.083063	1.67348	0.748821
557	78.7669	81.0906	79.7187	10.3522	15.7954	0.229247	0.085434	1.68832	0.754664
556	78.4629	81.3189	79.9282	10.4172	15.8549	0.231899	0.085035	1.69777	0.755515
555	78.1487	81.4527	80.1089	10.4527	15.9053	0.234413	0.086156	1.71548	0.758889
554	77.8798	81.6579	80.321	10.5099	15.9671	0.23892	0.087657	1.73202	0.765115
553	77.5122	81.8027	80.5342	10.5685	16.0228	0.237922	0.088278	1.74602	0.766834
552	77.2043	81.9317	80.6959	10.6207	16.0737	0.242091	0.08939	1.75854	0.770801
551	76.9002	82.1176	80.8761	10.6706	16.1331	0.243815	0.090246	1.77598	0.774388
550	76.5684	82.2585	81.0411	10.7256	16.1738	0.246944	0.091964	1.79171	0.776912
549	76.1956	82.3808	81.2048	10.7815	16.2281	0.250381	0.092131	1.80393	0.78093
548	75.8533	82.4935	81.3031	10.8407	16.28	0.250051	0.093927	1.8207	0.784317
547	75.4569	82.5944	81.4569	10.8923	16.322	0.254608	0.095447	1.83548	0.786994
546	75.0987	82.6738	81.5769	10.9516	16.3861	0.257134	0.095366	1.85308	0.790208
545	74.7286	82.7541	81.6992	11.0155	16.4243	0.258477	0.098367	1.86797	0.796263
544	74.3436	82.8635	81.7741	11.0648	16.4756	0.262111	0.097473	1.88448	0.801614
543	73.9628	82.9248	81.8892	11.1209	16.5218	0.264473	0.098936	1.89835	0.802659
542	73.5587	82.9584	81.9229	11.1764	16.5545	0.266161	0.100734	1.9132	0.808228
541	73.1605	83.0119	81.9975	11.2364	16.6019	0.270135	0.100944	1.93011	0.808557
540	72.75	83.0421	82.0205	11.2959	16.6449	0.271789	0.102478	1.94624	0.814274
539	72.3525	83.0715	82.0866	11.3573	16.6982	0.275331	0.103123	1.96228	0.817337
538	71.9555	83.0635	82.1724	11.4203	16.7434	0.277935	0.105119	1.98289	0.821024
537	71.5947	83.0992	82.1447	11.4732	16.8015	0.280089	0.106589	1.99198	0.827575
536	71.1515	83.0296	82.1255	11.5423	16.8334	0.283672	0.107429	2.00867	0.829396
535	70.7404	83.0489	82.1591	11.6048	16.8902	0.286156	0.109633	2.02606	0.832973
534	70.3595	83.022	82.1439	11.6592	16.9349	0.289687	0.110389	2.04379	0.837508
533	69.9445	83.0008	82.1104	11.7246	16.9727	0.29133	0.112069	2.05809	0.842162
532	69.4821	82.9067	82.0726	11.7842	17.019	0.294385	0.113529	2.07568	0.84621
531	69.0812	82.808	82.0156	11.8503	17.0554	0.297821	0.113756	2.09333	0.846225
530	68.669	82.7628	81.9902	11.912	17.1084	0.299291	0.117139	2.10556	0.85425
529	68.2462	82.6641	81.8769	11.9717	17.1426	0.30386	0.116979	2.12651	0.856501
528	67.8174	82.5645	81.7266	12.0319	17.182	0.30557	0.119128	2.14126	0.860515
527	67.4076	82.4573	81.6582	12.0958	17.2352	0.308326	0.121393	2.16342	0.862219
526	66.9902	82.2696	81.5151	12.1561	17.2735	0.312675	0.121025	2.176	0.865378
525	66.5887	82.1827	81.4059	12.2241	17.3182	0.313969	0.124019	2.19416	0.87075
524	66.1801	82.011	81.2349	12.2912	17.3651	0.318242	0.125358	2.21429	0.872951
523	65.8056	81.8575	81.0729	12.3463	17.4013	0.319806	0.126	2.2303	0.878793
522	65.4205	81.6915	80.9208	12.4072	17.4617	0.323545	0.12908	2.24819	0.877831
521	64.9741	81.4703	80.7203	12.4762	17.4911	0.327656	0.130522	2.26573	0.880729
520	64.6511	81.3177	80.5273	12.5397	17.5387	0.328776	0.130784	2.28404	0.881043
519	64.2714	81.0855	80.3248	12.5958	17.5913	0.332805	0.131484	2.30194	0.882047
518	63.8882	80.8673	80.099	12.6617	17.6361	0.334324	0.133899	2.32201	0.883529
517	63.5367	80.6593	79.8127	12.7189	17.678	0.33694	0.135452	2.33905	0.884753
516	63.1551	80.4177	79.611	12.7782	17.7203	0.340974	0.136677	2.35991	0.88396
515	62.7751	80.1553	79.3042	12.8372	17.7695	0.343653	0.138969	2.38034	0.880728
514	62.4179	79.8781	79.0181	12.8834	17.8243	0.347599	0.140412	2.39981	0.879082
513	62.0964	79.6315	78.7138	12.9484	17.88	0.348282	0.139822	2.42287	0.87694
512	61.7452	79.3486	78.4004	13.0054	17.928	0.351428	0.142423	2.44242	0.870248
511	61.3977	79.0085	78.0429	13.0525	17.9685	0.35363	0.143152	2.4658	0.868093
510	61.0873	78.7098	77.7262	13.1047	18.0339	0.35579	0.146757	2.4873	0.860549
509	60.7402	78.4017	77.3972	13.1498	18.0759	0.358606	0.147105	2.50743	0.854948
508	60.4445	78.1203	77.0512	13.2009	18.137	0.359588	0.147484	2.52956	0.848246
507	60.1112	77.7312	76.6559	13.2507	18.1789	0.36305	0.14918	2.55321	0.841398
506	59.8219	77.4075	76.2693	13.3069	18.2382	0.365604	0.149317	2.57179	0.835936
505	59.5127	77.072	75.8812	13.3496	18.2915	0.367698	0.151199	2.59269	0.830013
504	59.2037	76.6768	75.4507	13.3919	18.3135	0.371094	0.151636	2.61109	0.826089
503	58.923	76.3099	75.0421	13.4472	18.3736	0.371904	0.153862	2.63174	0.823306
502	58.674	75.9787	74.6485	13.4998	18.4207	0.375318	0.157182	2.64794	0.817755
[truncated: 302 more rows]

## Sheet: Photocatalysis
Visible light photocatalysis photocatalysis
Table of dye absorbance maxima at 606 nm
	0 mins	30 mins	60 mins	90 mins	120 mins	150 mins	180 mins
Time	0	30	60	90	120	150	180
Blank	0.609379	0.603901	0.610202	0.616416	0.590815	0.625207	0.62368
67% Film	0.622463	0.622116	0.619512	0.629996	0.632391	0.624565	0.629621
69% Film	0.583835	0.577366	0.569934	0.579857	0.58106	0.577963	0.579062
UV Photocatalysis
Table of dye absorbance maxima at 606 nm
Raw Absorbance
	0 mins	30 mins	60 mins	90 mins	120 mins	150 mins	180 mins
Time	0	30	60	90	120	150	180
Blank	0.706464	0.711861	0.703132	0.705185	0.707318	0.700245	0.702543
67% Film	0.705849	0.696258	0.698487	0.689374	0.689119	0.682011	0.680118
69% Film	0.680334	0.665942	0.652935	0.633737	0.605962	0.585695	0.562576
Conversion to DCIP concentration
mol dm-3
Time	0	30	60	90	120	150	180
Blank	3.95718e-05	3.99239e-05	3.93544e-05	3.94883e-05	3.96275e-05	3.9166e-05	3.93159e-05
67% Film	3.95316e-05	3.89058e-05	3.90513e-05	3.84567e-05	3.844e-05	3.79762e-05	3.78527e-05
69% Film	3.88668e-05	3.79277e-05	3.7079e-05	3.58263e-05	3.4014e-05	3.26916e-05	3.11831e-05
	Sample size / cm2	Rate / mol dm-3 min-1	Rate mol dm-3 cm-2 min-1			FQE
Blank
67% Film	9.75	8.94e-09	9.16923e-10			0.318376
69% Film	12	4.36e-08	3.63333e-09			1.26157
